# Supplementary material for: Exploring α-electron-deficiency-induced [1,2]-fluorine migration
Source: Royal Society of Chemistry journal article supplement (doi:10.1039/d3ob01335a), 2023-01-01
Supplement: d3ob01335a1.pdf [file d3ob01335a1.pdf]

## Supplemental Information

### Exploring $\alpha$ Electron-Deficiency Induced [1,2]-Fluorine Migration

Ke Zhang<sup>1†</sup>, Xi Chen<sup>2†</sup>, Zhoujie Zhang<sup>3</sup>, Caijie Bu<sup>4</sup>, Yong Wu<sup>3\*</sup>, Jiawei Xu<sup>4\*</sup>

1. College of Paediatric, Chongqing Medical University, Chongqing 401331, Chongqing, China.

2. Department of Chemistry and Materials Science, College of Science, Nanjing Forestry University, Nanjing 210037, Jiangsu, China.

3. Jiangsu Key Laboratory of Numerical Simulation of Large-Scale Complex System (NSLSCS), School of Chemistry and Materials Science, Nanjing Normal University, Nanjing 210023, Jiangsu, China.

4. State Key Laboratory of Structural Chemistry, Fujian Institute of Research on the Structure of Matter, Chinese Academy of Sciences, Fuzhou 350002, Fujian, China.

<sup>†</sup>These authors contributed equally to this work.

\*Corresponding Authors: [wuyong@njnu.edu.cn](mailto:wuyong@njnu.edu.cn) (Y. Wu) and [xujiawei@fjirsm.ac.cn](mailto:xujiawei@fjirsm.ac.cn) (J. Xu)

# Menu

|                               |    |
|-------------------------------|----|
| Menu.....                     | 2  |
| 1. Geometric Structures ..... | 3  |
| 2. Thermodynamics Data .....  | 55 |

## 1. Geometric Structures

This part records all of the optimized geometric structures in Cartesian coordinate. The imaginary frequency of each transition state is attached to corresponding geometric structure.

### 1-IM1

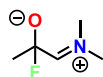

|    |   |           |           |           |
|----|---|-----------|-----------|-----------|
| 1  | C | -1.155012 | -0.027265 | -0.160966 |
| 2  | O | -1.203282 | 0.514636  | -1.313352 |
| 3  | C | 0.194174  | -0.753514 | 0.005922  |
| 4  | H | 0.220526  | -1.849498 | -0.010620 |
| 5  | N | 1.332866  | -0.163298 | 0.019250  |
| 6  | C | 1.456752  | 1.300289  | -0.003146 |
| 7  | H | 0.597223  | 1.703066  | -0.543787 |
| 8  | H | 1.475915  | 1.674951  | 1.027438  |
| 9  | H | 2.396145  | 1.549152  | -0.508259 |
| 10 | C | 2.593727  | -0.904715 | 0.045621  |
| 11 | H | 2.391620  | -1.976814 | 0.125335  |
| 12 | H | 3.151775  | -0.691181 | -0.874735 |
| 13 | H | 3.179886  | -0.567528 | 0.909497  |
| 14 | C | -2.309506 | -0.942541 | 0.242573  |
| 15 | H | -2.377591 | -1.782514 | -0.462658 |
| 16 | H | -2.195799 | -1.329937 | 1.264949  |
| 17 | H | -3.233897 | -0.353747 | 0.177102  |
| 18 | F | -1.110047 | 0.957392  | 0.943087  |

### 1-TS (Frequency: 248.8620 i cm<sup>-1</sup>)

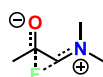

|    |   |           |           |           |
|----|---|-----------|-----------|-----------|
| 1  | C | -1.186804 | 0.222256  | -0.169410 |
| 2  | O | -1.243307 | 1.440907  | -0.033283 |
| 3  | C | 0.122306  | -0.532687 | -0.287466 |
| 4  | H | 0.046921  | -1.598831 | -0.508103 |
| 5  | N | 1.320771  | -0.068282 | -0.175119 |
| 6  | C | 1.653972  | 1.334858  | 0.082256  |
| 7  | H | 0.733355  | 1.916565  | 0.147196  |
| 8  | H | 2.218166  | 1.386043  | 1.022867  |
| 9  | H | 2.293074  | 1.694428  | -0.734667 |
| 10 | C | 2.476772  | -0.963710 | -0.214464 |
| 11 | H | 2.156172  | -1.976945 | -0.475134 |
| 12 | H | 3.188854  | -0.593709 | -0.962477 |
| 13 | H | 2.961497  | -0.968693 | 0.770713  |
| 14 | F | -0.992089 | -0.652413 | 1.376824  |
| 15 | C | -2.382626 | -0.544726 | -0.692921 |
| 16 | H | -2.551227 | -0.267960 | -1.743997 |
| 17 | H | -2.261664 | -1.630720 | -0.615478 |

|    |   |           |           |           |
|----|---|-----------|-----------|-----------|
| 18 | H | -3.257016 | -0.233691 | -0.108216 |
|----|---|-----------|-----------|-----------|

### 1-IM2

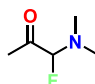

|    |   |           |           |           |
|----|---|-----------|-----------|-----------|
| 1  | C | 1.301496  | 0.336713  | 0.269970  |
| 2  | O | 1.378399  | 1.493876  | 0.595903  |
| 3  | C | -0.025320 | -0.422581 | 0.447395  |
| 4  | H | -0.064880 | -0.776485 | 1.491771  |
| 5  | N | -1.158568 | 0.355023  | 0.173149  |
| 6  | C | -1.230189 | 0.884014  | -1.179474 |
| 7  | H | -0.293403 | 1.394339  | -1.439144 |
| 8  | H | -1.425752 | 0.096722  | -1.930609 |
| 9  | H | -2.042064 | 1.621580  | -1.236573 |
| 10 | C | -2.408870 | -0.240492 | 0.612485  |
| 11 | H | -2.317993 | -0.567345 | 1.657302  |
| 12 | H | -3.210612 | 0.508311  | 0.553583  |
| 13 | H | -2.704022 | -1.111383 | -0.002260 |
| 14 | C | 2.455969  | -0.456466 | -0.270978 |
| 15 | H | 2.591388  | -1.377588 | 0.313311  |
| 16 | H | 2.226734  | -0.767386 | -1.300448 |
| 17 | H | 3.364768  | 0.154042  | -0.248333 |
| 18 | F | 0.044456  | -1.579789 | -0.346029 |

### 2-IM1

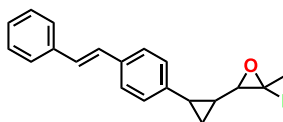

|    |   |           |           |           |
|----|---|-----------|-----------|-----------|
| 1  | C | 2.868523  | 0.704445  | -0.545242 |
| 2  | C | 3.733330  | -0.350849 | 0.107409  |
| 3  | H | 3.291923  | 1.712333  | -0.543412 |
| 4  | H | 3.197725  | -1.144312 | 0.636741  |
| 5  | C | 4.988888  | 0.096175  | 0.783861  |
| 6  | C | 6.323394  | -0.430437 | 0.490104  |
| 7  | H | 4.865196  | 0.539002  | 1.779359  |
| 8  | O | 5.944640  | 0.791290  | -0.031513 |
| 9  | C | 1.387233  | 0.661875  | -0.417306 |
| 10 | C | 0.672183  | -0.547530 | -0.425042 |
| 11 | C | 0.661784  | 1.850324  | -0.280479 |
| 12 | C | -0.710579 | -0.566191 | -0.300957 |
| 13 | H | 1.202961  | -1.496948 | -0.529468 |
| 14 | C | -0.725346 | 1.832589  | -0.156630 |
| 15 | H | 1.192515  | 2.804518  | -0.271329 |
| 16 | C | -1.442936 | 0.627236  | -0.164662 |

|    |   |           |           |           |
|----|---|-----------|-----------|-----------|
| 17 | H | -1.225170 | -1.528078 | -0.310172 |
| 18 | H | -1.268394 | 2.774510  | -0.051751 |
| 19 | C | -2.906140 | 0.668159  | -0.032854 |
| 20 | C | -3.737811 | -0.388408 | -0.042252 |
| 21 | H | -3.322112 | 1.673798  | 0.080430  |
| 22 | H | -3.322299 | -1.393901 | -0.158269 |
| 23 | C | -5.202553 | -0.345641 | 0.088815  |
| 24 | C | -5.917859 | -1.553816 | 0.055203  |
| 25 | C | -5.927391 | 0.849485  | 0.246376  |
| 26 | C | -7.306667 | -1.573346 | 0.173818  |
| 27 | H | -5.370303 | -2.491113 | -0.066253 |
| 28 | C | -7.313385 | 0.830627  | 0.364824  |
| 29 | H | -5.405782 | 1.807131  | 0.277132  |
| 30 | C | -8.011047 | -0.380173 | 0.329229  |
| 31 | H | -7.839616 | -2.525006 | 0.144445  |
| 32 | H | -7.856305 | 1.769367  | 0.486127  |
| 33 | H | -9.097954 | -0.390371 | 0.422345  |
| 34 | C | 3.615424  | -0.303777 | -1.379442 |
| 35 | H | 4.477307  | 0.068951  | -1.935798 |
| 36 | H | 3.033214  | -1.083811 | -1.873553 |
| 37 | C | 6.681933  | -1.549553 | -0.434558 |
| 38 | H | 6.797308  | -2.477705 | 0.138991  |
| 39 | H | 5.904482  | -1.685620 | -1.192768 |
| 40 | H | 7.635423  | -1.316749 | -0.928104 |
| 41 | F | 7.240767  | -0.303718 | 1.487349  |

**2-TS (Frequency: 153.8032 i cm<sup>-1</sup>)**

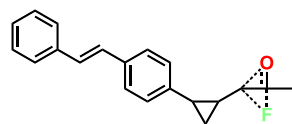

|    |   |           |           |           |
|----|---|-----------|-----------|-----------|
| 1  | C | 2.997511  | -0.336889 | -0.716492 |
| 2  | C | 3.751644  | -1.094718 | 0.549389  |
| 3  | H | 3.530088  | 0.552465  | -1.061225 |
| 4  | H | 3.039609  | -1.515440 | 1.260115  |
| 5  | C | 4.627553  | -0.118609 | 1.015823  |
| 6  | C | 5.732312  | 0.660333  | 0.341576  |
| 7  | H | 4.464005  | 0.255461  | 2.029288  |
| 8  | O | 5.677365  | 1.889808  | 0.508155  |
| 9  | C | 6.376103  | 0.103235  | -0.918598 |
| 10 | H | 5.771977  | 0.347200  | -1.805396 |
| 11 | H | 7.341082  | 0.615488  | -1.021165 |
| 12 | H | 6.552311  | -0.977160 | -0.862882 |
| 13 | F | 6.664612  | -0.138101 | 1.463063  |
| 14 | C | 1.537801  | -0.165395 | -0.570989 |
| 15 | C | 0.672680  | -1.243997 | -0.323948 |
| 16 | C | 0.994957  | 1.118661  | -0.695612 |
| 17 | C | -0.693417 | -1.041205 | -0.205964 |
| 18 | H | 1.063618  | -2.258051 | -0.220528 |
| 19 | C | -0.376281 | 1.318518  | -0.581275 |

|    |   |           |           |           |
|----|---|-----------|-----------|-----------|
| 20 | H | 1.653382  | 1.968554  | -0.884803 |
| 21 | C | -1.248806 | 0.246806  | -0.333537 |
| 22 | H | -1.335539 | -1.900945 | -0.013903 |
| 23 | H | -0.784050 | 2.325710  | -0.684184 |
| 24 | C | -2.687469 | 0.518518  | -0.220114 |
| 25 | C | -3.649377 | -0.395044 | 0.001084  |
| 26 | H | -2.961658 | 1.571063  | -0.333434 |
| 27 | H | -3.372130 | -1.447877 | 0.108497  |
| 28 | C | -5.091197 | -0.131245 | 0.116792  |
| 29 | C | -5.958622 | -1.217110 | 0.317649  |
| 30 | C | -5.646033 | 1.158618  | 0.036355  |
| 31 | C | -7.334620 | -1.026993 | 0.432406  |
| 32 | H | -5.541988 | -2.224557 | 0.383265  |
| 33 | C | -7.019136 | 1.348665  | 0.151180  |
| 34 | H | -5.001072 | 2.025153  | -0.115639 |
| 35 | C | -7.870353 | 0.257557  | 0.349248  |
| 36 | H | -7.989634 | -1.885551 | 0.587746  |
| 37 | H | -7.431009 | 2.356936  | 0.086658  |
| 38 | H | -8.946657 | 0.411392  | 0.438879  |
| 39 | C | 3.692743  | -1.618751 | -0.865717 |
| 40 | H | 4.616572  | -1.623774 | -1.440248 |
| 41 | H | 3.082706  | -2.517362 | -0.959382 |

**2-IM2**

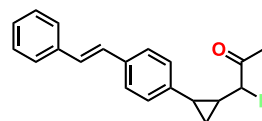

|    |   |           |           |           |
|----|---|-----------|-----------|-----------|
| 1  | C | -2.994183 | 0.423630  | 0.407098  |
| 2  | C | -3.778922 | -0.741073 | -0.137486 |
| 3  | H | -3.468501 | 1.399650  | 0.289578  |
| 4  | H | -3.182195 | -1.557974 | -0.553699 |
| 5  | C | -5.057948 | -0.544946 | -0.916951 |
| 6  | C | -6.029407 | 0.425155  | -0.247974 |
| 7  | H | -4.836699 | -0.167544 | -1.927883 |
| 8  | O | -5.752733 | 1.599488  | -0.184825 |
| 9  | C | -7.290909 | -0.164496 | 0.312591  |
| 10 | H | -7.868593 | 0.616536  | 0.817876  |
| 11 | H | -7.878673 | -0.614090 | -0.500375 |
| 12 | H | -7.042283 | -0.978983 | 1.008475  |
| 13 | F | -5.676154 | -1.774457 | -1.052657 |
| 14 | C | -1.508506 | 0.442948  | 0.301076  |
| 15 | C | -0.732464 | -0.720153 | 0.433943  |
| 16 | C | -0.843661 | 1.650740  | 0.065216  |
| 17 | C | 0.651618  | -0.676085 | 0.334020  |
| 18 | H | -1.214611 | -1.682991 | 0.619583  |
| 19 | C | 0.544929  | 1.696205  | -0.035174 |
| 20 | H | -1.423503 | 2.569793  | -0.040983 |
| 21 | C | 1.323551  | 0.536938  | 0.096854  |
| 22 | H | 1.215176  | -1.603732 | 0.442944  |

|    |   |           |           |           |
|----|---|-----------|-----------|-----------|
| 23 | H | 1.040079  | 2.652140  | -0.219750 |
| 24 | C | 2.785205  | 0.642735  | -0.016353 |
| 25 | C | 3.667606  | -0.365905 | 0.093085  |
| 26 | H | 3.152737  | 1.655433  | -0.207474 |
| 27 | H | 3.299489  | -1.378203 | 0.284992  |
| 28 | C | 5.130688  | -0.260903 | -0.019379 |
| 29 | C | 5.902377  | -1.425797 | 0.121723  |
| 30 | C | 5.799904  | 0.952257  | -0.262024 |
| 31 | C | 7.292412  | -1.386191 | 0.024750  |
| 32 | H | 5.398482  | -2.376338 | 0.310574  |
| 33 | C | 7.187142  | 0.992377  | -0.358982 |
| 34 | H | 5.233311  | 1.877453  | -0.376613 |
| 35 | C | 7.941327  | -0.175898 | -0.216283 |
| 36 | H | 7.869918  | -2.304990 | 0.138098  |
| 37 | H | 7.686446  | 1.944100  | -0.547658 |
| 38 | H | 9.028960  | -0.139881 | -0.292978 |
| 39 | C | -3.697836 | -0.529449 | 1.340498  |
| 40 | H | -4.577865 | -0.149825 | 1.865245  |
| 41 | H | -3.081967 | -1.218877 | 1.921069  |

### 3a-IM1

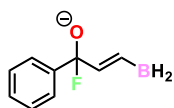

|    |   |           |           |           |
|----|---|-----------|-----------|-----------|
| 1  | C | 2.539297  | 1.023886  | 0.835988  |
| 2  | C | 1.243445  | 0.548024  | 1.040350  |
| 3  | C | 0.621581  | -0.254608 | 0.077185  |
| 4  | C | 1.319643  | -0.579782 | -1.086540 |
| 5  | C | 2.616196  | -0.106805 | -1.296532 |
| 6  | C | 3.228622  | 0.699192  | -0.335478 |
| 7  | H | 3.018246  | 1.645105  | 1.595545  |
| 8  | H | 0.707203  | 0.782011  | 1.961856  |
| 9  | H | 0.817655  | -1.226098 | -1.808372 |
| 10 | H | 3.153435  | -0.368912 | -2.210040 |
| 11 | H | 4.241999  | 1.071637  | -0.496000 |
| 12 | C | -0.821833 | -0.788650 | 0.237247  |
| 13 | O | -1.134897 | -1.786729 | -0.479763 |
| 14 | C | -1.781409 | 0.413567  | 0.200220  |
| 15 | C | -2.836880 | 0.476093  | -0.637477 |
| 16 | H | -1.569051 | 1.246689  | 0.883344  |
| 17 | H | -2.958501 | -0.404630 | -1.280101 |
| 18 | F | -0.876330 | -1.088030 | 1.717582  |
| 19 | B | -3.781324 | 1.680927  | -0.642457 |
| 20 | H | -3.552684 | 2.616951  | 0.087317  |
| 21 | H | -4.757506 | 1.733201  | -1.351175 |

### 3a-TS (Frequency: 216.2276 i cm<sup>-1</sup>)

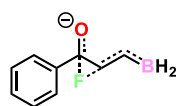

|    |   |           |           |           |
|----|---|-----------|-----------|-----------|
| 1  | C | 2.405531  | -1.574207 | 0.164436  |
| 2  | C | 1.063754  | -1.193690 | 0.216603  |
| 3  | C | 0.709499  | 0.158536  | 0.158193  |
| 4  | C | 1.720700  | 1.121259  | 0.063760  |
| 5  | C | 3.059244  | 0.743542  | -0.000634 |
| 6  | C | 3.405606  | -0.608804 | 0.049600  |
| 7  | H | 2.669975  | -2.631635 | 0.215973  |
| 8  | H | 0.298604  | -1.964143 | 0.314721  |
| 9  | H | 1.430796  | 2.172513  | 0.042415  |
| 10 | H | 3.837380  | 1.504007  | -0.086108 |
| 11 | H | 4.453814  | -0.908798 | 0.004117  |
| 12 | C | -0.712849 | 0.647473  | 0.253320  |
| 13 | O | -0.933215 | 1.796119  | 0.594276  |
| 14 | C | -1.831175 | -0.322920 | 0.038969  |
| 15 | C | -3.127678 | -0.027611 | 0.379453  |
| 16 | H | -1.573474 | -1.344766 | -0.235692 |
| 17 | H | -3.303434 | 0.998874  | 0.719535  |
| 18 | F | -1.136777 | 0.288860  | -1.744575 |
| 19 | B | -4.200716 | -1.078660 | 0.298634  |
| 20 | H | -3.922937 | -2.190574 | -0.098867 |
| 21 | H | -5.346226 | -0.872330 | 0.635504  |

### 3a-IM2

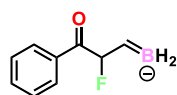

|    |   |           |           |           |
|----|---|-----------|-----------|-----------|
| 1  | C | -2.479213 | -1.436736 | -0.241516 |
| 2  | C | -1.132686 | -1.085820 | -0.150762 |
| 3  | C | -0.764653 | 0.259835  | -0.016932 |
| 4  | C | -1.762255 | 1.242671  | 0.026980  |
| 5  | C | -3.106044 | 0.891738  | -0.060586 |
| 6  | C | -3.465959 | -0.451254 | -0.196474 |
| 7  | H | -2.759381 | -2.486010 | -0.344588 |
| 8  | H | -0.368298 | -1.861914 | -0.163589 |
| 9  | H | -1.457793 | 2.285245  | 0.127301  |
| 10 | H | -3.876102 | 1.663809  | -0.025314 |
| 11 | H | -4.518691 | -0.729970 | -0.266918 |
| 12 | C | 0.671115  | 0.711035  | 0.049556  |
| 13 | O | 0.932484  | 1.890075  | 0.128319  |
| 14 | C | 1.773826  | -0.358217 | -0.006320 |
| 15 | C | 3.158803  | 0.134940  | 0.061373  |
| 16 | H | 1.619294  | -0.966570 | -0.914444 |
| 17 | H | 3.314376  | 0.872276  | 0.861569  |
| 18 | F | 1.433318  | -1.219389 | 1.087344  |
| 19 | B | 4.202968  | -0.284571 | -0.862947 |

|    |   |          |           |           |
|----|---|----------|-----------|-----------|
| 20 | H | 3.962709 | -1.085539 | -1.761851 |
| 21 | H | 5.351701 | 0.136282  | -0.801992 |

### 3b-IM1

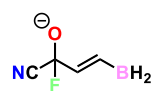

|    |   |           |           |           |
|----|---|-----------|-----------|-----------|
| 1  | C | 0.548706  | -0.426952 | -0.098147 |
| 2  | O | 0.580619  | -1.096683 | -1.158089 |
| 3  | C | -0.793617 | 0.141033  | 0.378201  |
| 4  | C | -1.911437 | 0.047881  | -0.363302 |
| 5  | H | -0.799567 | 0.630802  | 1.359774  |
| 6  | H | -1.788237 | -0.456776 | -1.328288 |
| 7  | F | 1.000007  | -1.161074 | 1.097415  |
| 8  | C | 1.565588  | 0.755439  | -0.075053 |
| 9  | N | 2.331677  | 1.616038  | -0.168143 |
| 10 | B | -3.253828 | 0.597830  | 0.149401  |
| 11 | H | -3.291113 | 1.154200  | 1.219597  |
| 12 | H | -4.274143 | 0.489075  | -0.483301 |

### 3b-TS (Frequency: 313.6585 i cm<sup>-1</sup>)

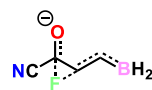

|    |   |           |           |           |
|----|---|-----------|-----------|-----------|
| 1  | C | -0.579514 | 0.548676  | -0.077219 |
| 2  | O | -0.640319 | 1.706390  | 0.249671  |
| 3  | C | 0.668136  | -0.245575 | -0.249241 |
| 4  | C | 1.913036  | 0.330481  | -0.096599 |
| 5  | H | 0.566645  | -1.192902 | -0.783288 |
| 6  | H | 1.920110  | 1.340709  | 0.326367  |
| 7  | F | -0.152617 | -0.910661 | 1.312249  |
| 8  | C | -1.848338 | -0.180510 | -0.385212 |
| 9  | N | -2.850278 | -0.682602 | -0.657100 |
| 10 | B | 3.147006  | -0.414381 | -0.504577 |
| 11 | H | 3.048724  | -1.533779 | -0.962954 |
| 12 | H | 4.257624  | 0.062492  | -0.415513 |

### 3b-IM2

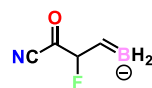

|   |   |           |           |           |
|---|---|-----------|-----------|-----------|
| 1 | C | 0.574649  | 0.677133  | 0.248581  |
| 2 | O | 0.765241  | 1.854771  | 0.409534  |
| 3 | C | -0.649096 | -0.107779 | 0.643253  |
| 4 | C | -1.392833 | -0.384268 | -0.603379 |
| 5 | H | -1.225807 | 0.501124  | 1.354794  |
| 6 | H | -0.834617 | -1.024046 | -1.302044 |
| 7 | F | -0.192612 | -1.262785 | 1.299966  |
| 8 | C | 1.594752  | -0.136832 | -0.493176 |

|    |   |           |           |           |
|----|---|-----------|-----------|-----------|
| 9  | N | 2.417761  | -0.744298 | -1.026548 |
| 10 | B | -2.696912 | 0.207402  | -0.909532 |
| 11 | H | -3.264752 | 0.923130  | -0.097349 |
| 12 | H | -3.267843 | 0.010234  | -1.969549 |

### 3c-IM1

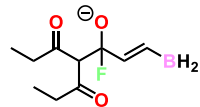

|    |   |           |           |           |
|----|---|-----------|-----------|-----------|
| 1  | C | -0.710501 | -0.918905 | -0.295738 |
| 2  | O | -0.562034 | -0.612455 | -1.513219 |
| 3  | C | -2.142685 | -0.967374 | 0.246863  |
| 4  | C | -3.209940 | -0.595618 | -0.485630 |
| 5  | H | -2.271672 | -1.326371 | 1.275326  |
| 6  | H | -2.976652 | -0.255198 | -1.501217 |
| 7  | F | -0.275123 | -2.334855 | 0.009485  |
| 8  | C | 0.189774  | -0.132675 | 0.746640  |
| 9  | H | -0.119207 | -0.383897 | 1.770211  |
| 10 | C | -0.092278 | 1.346565  | 0.568454  |
| 11 | O | -0.960195 | 1.880342  | 1.226602  |
| 12 | C | 1.664195  | -0.507576 | 0.655283  |
| 13 | O | 2.325944  | -0.527919 | 1.672130  |
| 14 | C | 0.669208  | 2.090033  | -0.499993 |
| 15 | H | 1.747387  | 1.998554  | -0.281135 |
| 16 | H | 0.495581  | 1.504419  | -1.418941 |
| 17 | C | 0.246988  | 3.541636  | -0.640709 |
| 18 | H | 0.402254  | 4.088309  | 0.299611  |
| 19 | H | 0.821098  | 4.041490  | -1.431719 |
| 20 | H | -0.820482 | 3.611752  | -0.890241 |
| 21 | C | 2.276982  | -0.871806 | -0.676994 |
| 22 | H | 1.763656  | -1.797532 | -0.980437 |
| 23 | H | 1.958914  | -0.139475 | -1.429965 |
| 24 | C | 3.785414  | -1.035244 | -0.608324 |
| 25 | H | 4.064381  | -1.801024 | 0.127638  |
| 26 | H | 4.189754  | -1.329303 | -1.585991 |
| 27 | H | 4.270105  | -0.096119 | -0.304264 |
| 28 | B | -4.630232 | -0.664239 | 0.089975  |
| 29 | H | -5.602129 | -0.351352 | -0.553025 |
| 30 | H | -4.788398 | -1.043336 | 1.225692  |

### 3c-TS (Frequency: 248.1467 i cm<sup>-1</sup>)

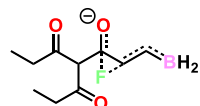

|   |   |           |          |           |
|---|---|-----------|----------|-----------|
| 1 | C | -0.950110 | 0.410996 | -0.315747 |
| 2 | O | -0.720740 | 0.571989 | -1.494643 |
| 3 | C | -2.345764 | 0.414333 | 0.233534  |
| 4 | C | -3.438256 | 0.655165 | -0.568419 |
| 5 | H | -2.440619 | 0.504949 | 1.316935  |

|    |   |           |           |           |
|----|---|-----------|-----------|-----------|
| 6  | H | -3.241305 | 0.665283  | -1.645983 |
| 7  | F | -1.813150 | -1.455586 | 0.419013  |
| 8  | C | 0.179521  | 0.197774  | 0.691970  |
| 9  | H | -0.212465 | 0.291240  | 1.710298  |
| 10 | C | 1.255388  | 1.280312  | 0.552097  |
| 11 | O | 1.302127  | 2.183464  | 1.353571  |
| 12 | C | 0.790115  | -1.210464 | 0.605922  |
| 13 | O | 1.251528  | -1.695340 | 1.612096  |
| 14 | C | 2.220449  | 1.180070  | -0.603384 |
| 15 | H | 2.760238  | 0.222094  | -0.498948 |
| 16 | H | 1.610327  | 1.076018  | -1.515189 |
| 17 | C | 3.183497  | 2.351902  | -0.678225 |
| 18 | H | 3.779260  | 2.426584  | 0.241310  |
| 19 | H | 3.867809  | 2.238351  | -1.528643 |
| 20 | H | 2.636241  | 3.296978  | -0.796316 |
| 21 | C | 0.829053  | -1.925418 | -0.722540 |
| 22 | H | -0.224811 | -2.192391 | -0.899279 |
| 23 | H | 1.090647  | -1.210969 | -1.515951 |
| 24 | C | 1.739477  | -3.141400 | -0.708630 |
| 25 | H | 1.437633  | -3.843218 | 0.079799  |
| 26 | H | 1.702701  | -3.664793 | -1.672941 |
| 27 | H | 2.782918  | -2.853701 | -0.513408 |
| 28 | B | -4.793912 | 0.882557  | 0.034749  |
| 29 | H | -5.776119 | 1.120230  | -0.634357 |
| 30 | H | -4.928063 | 0.850310  | 1.240143  |

### 3c-IM2

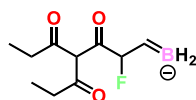

|    |   |           |           |           |
|----|---|-----------|-----------|-----------|
| 1  | C | 0.693457  | -0.948045 | -0.008029 |
| 2  | O | 0.426435  | -1.714491 | -0.900679 |
| 3  | C | 2.135670  | -0.689103 | 0.430127  |
| 4  | C | 3.128419  | -0.585885 | -0.657566 |
| 5  | H | 2.398311  | -1.510196 | 1.121538  |
| 6  | H | 2.808472  | 0.066413  | -1.483838 |
| 7  | F | 2.062542  | 0.479834  | 1.249861  |
| 8  | C | -0.398984 | -0.227726 | 0.785911  |
| 9  | H | -0.196452 | -0.370400 | 1.856239  |
| 10 | C | -1.766977 | -0.854747 | 0.499197  |
| 11 | O | -2.238956 | -1.644522 | 1.279272  |
| 12 | C | -0.421744 | 1.291412  | 0.550713  |
| 13 | O | -0.933135 | 2.007873  | 1.375240  |
| 14 | C | -2.461798 | -0.463272 | -0.782166 |
| 15 | H | -2.602086 | 0.632109  | -0.768072 |
| 16 | H | -1.749956 | -0.668086 | -1.598608 |
| 17 | C | -3.780842 | -1.187150 | -0.989614 |
| 18 | H | -4.475682 | -0.974446 | -0.166284 |
| 19 | H | -4.250194 | -0.875589 | -1.931240 |

|    |   |           |           |           |
|----|---|-----------|-----------|-----------|
| 20 | H | -3.624566 | -2.273759 | -1.021122 |
| 21 | C | 0.161478  | 1.813987  | -0.739191 |
| 22 | H | 1.247465  | 1.629180  | -0.670815 |
| 23 | H | -0.194303 | 1.175206  | -1.564644 |
| 24 | C | -0.140143 | 3.282415  | -0.980578 |
| 25 | H | 0.233848  | 3.894150  | -0.149322 |
| 26 | H | 0.331933  | 3.627872  | -1.908801 |
| 27 | H | -1.223385 | 3.450920  | -1.058366 |
| 28 | B | 4.386831  | -1.319955 | -0.658031 |
| 29 | H | 5.199591  | -1.236197 | -1.568681 |
| 30 | H | 4.674007  | -2.068110 | 0.269939  |

### 3d-IM1

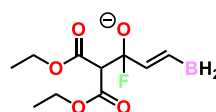

|    |   |           |           |           |
|----|---|-----------|-----------|-----------|
| 1  | C | -1.414509 | -0.819479 | -0.286703 |
| 2  | O | -1.258981 | -0.661016 | -1.522407 |
| 3  | C | -2.786285 | -0.475709 | 0.305641  |
| 4  | C | -3.796438 | 0.010140  | -0.440867 |
| 5  | H | -2.927122 | -0.662690 | 1.377740  |
| 6  | H | -3.552718 | 0.161023  | -1.498870 |
| 7  | F | -1.312646 | -2.266202 | 0.154246  |
| 8  | C | -0.279860 | -0.202046 | 0.654515  |
| 9  | H | -0.640869 | -0.160033 | 1.690552  |
| 10 | C | -0.048462 | 1.218490  | 0.214884  |
| 11 | O | -0.891186 | 2.076678  | 0.306281  |
| 12 | C | 0.943908  | -1.081953 | 0.683642  |
| 13 | O | 1.417451  | -1.523052 | 1.704448  |
| 14 | C | 1.474959  | 2.773522  | -0.703295 |
| 15 | H | 2.311150  | 2.660226  | -1.403397 |
| 16 | H | 0.608237  | 3.177240  | -1.242908 |
| 17 | C | 2.634581  | -2.129988 | -0.574414 |
| 18 | H | 2.550124  | -2.960317 | 0.139328  |
| 19 | H | 2.658603  | -2.537048 | -1.592474 |
| 20 | B | -5.167820 | 0.309479  | 0.175314  |
| 21 | H | -6.093492 | 0.721783  | -0.480129 |
| 22 | H | -5.336059 | 0.128292  | 1.357714  |
| 23 | C | 1.851464  | 3.654829  | 0.470326  |
| 24 | H | 2.144219  | 4.650779  | 0.111176  |
| 25 | H | 1.000243  | 3.767858  | 1.154460  |
| 26 | H | 2.697590  | 3.221135  | 1.020838  |
| 27 | C | 3.861521  | -1.286026 | -0.290126 |
| 28 | H | 3.920728  | -0.445069 | -0.994671 |
| 29 | H | 3.824684  | -0.889949 | 0.733465  |
| 30 | H | 4.770231  | -1.894297 | -0.395790 |
| 31 | O | 1.444709  | -1.341065 | -0.519874 |
| 32 | O | 1.172018  | 1.440806  | -0.273879 |

### 3d-TS (Frequency: 243.2318 i cm<sup>-1</sup>)

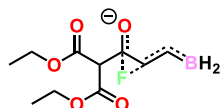

|    |   |           |           |           |
|----|---|-----------|-----------|-----------|
| 1  | C | 1.459890  | -0.494051 | -0.400669 |
| 2  | O | 1.354535  | -0.535335 | -1.602740 |
| 3  | C | 2.781884  | -0.545986 | 0.300953  |
| 4  | C | 3.964143  | -0.697694 | -0.386026 |
| 5  | H | 2.756029  | -0.734437 | 1.375860  |
| 6  | H | 3.893410  | -0.607836 | -1.475457 |
| 7  | F | 2.166709  | 1.293362  | 0.591943  |
| 8  | C | 0.209830  | -0.393572 | 0.484909  |
| 9  | H | 0.441660  | -0.733191 | 1.503595  |
| 10 | C | -0.876892 | -1.315236 | -0.043814 |
| 11 | O | -0.672386 | -2.437231 | -0.424383 |
| 12 | C | -0.272063 | 1.040159  | 0.621772  |
| 13 | O | -0.566295 | 1.553411  | 1.669123  |
| 14 | C | -3.200865 | -1.549700 | -0.414139 |
| 15 | H | -3.979231 | -0.822595 | -0.672670 |
| 16 | H | -2.915833 | -2.106858 | -1.316160 |
| 17 | C | -0.918173 | 2.960437  | -0.568785 |
| 18 | H | -0.433306 | 3.518938  | 0.243106  |
| 19 | H | -0.596910 | 3.379907  | -1.529727 |
| 20 | B | 5.245922  | -0.967108 | 0.348119  |
| 21 | H | 6.304078  | -1.129251 | -0.220033 |
| 22 | H | 5.238637  | -1.048206 | 1.558646  |
| 23 | C | -3.652669 | -2.480536 | 0.691695  |
| 24 | H | -4.547512 | -3.030546 | 0.370642  |
| 25 | H | -2.865412 | -3.207741 | 0.930043  |
| 26 | H | -3.900650 | -1.910781 | 1.597438  |
| 27 | C | -2.427491 | 2.985917  | -0.432828 |
| 28 | H | -2.894347 | 2.396359  | -1.234027 |
| 29 | H | -2.731702 | 2.570816  | 0.536958  |
| 30 | H | -2.794141 | 4.019202  | -0.501742 |
| 31 | O | -0.422301 | 1.619907  | -0.564907 |
| 32 | O | -2.082344 | -0.752869 | 0.003788  |

### 3d-IM2

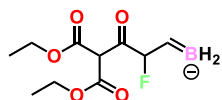

|   |   |           |           |           |
|---|---|-----------|-----------|-----------|
| 1 | C | 1.084007  | -1.196522 | -0.080958 |
| 2 | O | 0.830931  | -1.887192 | -1.033547 |
| 3 | C | 2.513803  | -0.832728 | 0.312248  |
| 4 | C | 3.335424  | -0.240616 | -0.764707 |
| 5 | H | 2.975809  | -1.766166 | 0.679656  |
| 6 | H | 2.846439  | 0.611305  | -1.257565 |
| 7 | F | 2.380904  | 0.007184  | 1.455299  |
| 8 | C | -0.031095 | -0.678714 | 0.841335  |

|    |   |           |           |           |
|----|---|-----------|-----------|-----------|
| 9  | H | 0.144759  | -1.047112 | 1.859716  |
| 10 | C | -1.363339 | -1.219840 | 0.359578  |
| 11 | O | -1.844266 | -2.253023 | 0.738792  |
| 12 | C | -0.043720 | 0.840038  | 0.891330  |
| 13 | O | -0.475810 | 1.480753  | 1.811143  |
| 14 | C | -3.176076 | -0.817634 | -1.102927 |
| 15 | H | -3.242594 | -0.284728 | -2.058177 |
| 16 | H | -3.149523 | -1.898200 | -1.294819 |
| 17 | C | 0.420778  | 2.785589  | -0.364042 |
| 18 | H | 0.709466  | 3.233992  | 0.595633  |
| 19 | H | 1.191663  | 3.008932  | -1.110527 |
| 20 | B | 4.631624  | -0.776752 | -1.155020 |
| 21 | H | 5.298813  | -0.298163 | -2.062758 |
| 22 | H | 5.104671  | -1.750664 | -0.578673 |
| 23 | C | -4.314243 | -0.445692 | -0.175764 |
| 24 | H | -5.273865 | -0.699885 | -0.645546 |
| 25 | H | -4.235545 | -0.994450 | 0.772025  |
| 26 | H | -4.303551 | 0.632852  | 0.032931  |
| 27 | C | -0.947139 | 3.257535  | -0.811530 |
| 28 | H | -1.231024 | 2.770088  | -1.754134 |
| 29 | H | -1.702719 | 3.025183  | -0.048967 |
| 30 | H | -0.934368 | 4.344325  | -0.969390 |
| 31 | O | 0.443716  | 1.357920  | -0.229702 |
| 32 | O | -1.911459 | -0.420544 | -0.550359 |

### 4a-IM1

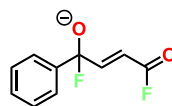

|    |   |           |           |           |
|----|---|-----------|-----------|-----------|
| 1  | C | -3.026704 | -1.282239 | 0.810717  |
| 2  | C | -1.873793 | -0.532101 | 1.044004  |
| 3  | C | -1.361265 | 0.308926  | 0.049770  |
| 4  | C | -2.022600 | 0.392739  | -1.175831 |
| 5  | C | -3.176640 | -0.355332 | -1.414471 |
| 6  | C | -3.680252 | -1.197008 | -0.421243 |
| 7  | H | -3.422127 | -1.932576 | 1.593514  |
| 8  | H | -1.369263 | -0.581870 | 2.010978  |
| 9  | H | -1.609861 | 1.069343  | -1.925784 |
| 10 | H | -3.687600 | -0.281094 | -2.376623 |
| 11 | H | -4.582256 | -1.783760 | -0.604424 |
| 12 | C | -0.075236 | 1.144464  | 0.246855  |
| 13 | O | 0.096328  | 2.114033  | -0.551395 |
| 14 | C | 1.106428  | 0.166390  | 0.389588  |
| 15 | C | 2.186688  | 0.299749  | -0.386158 |
| 16 | H | 1.041514  | -0.641548 | 1.125024  |
| 17 | H | 2.221526  | 1.115895  | -1.110299 |
| 18 | F | -0.197205 | 1.576499  | 1.682213  |
| 19 | C | 3.352127  | -0.581485 | -0.321420 |
| 20 | O | 4.352242  | -0.521047 | -0.962283 |



21 F 3.224648 -1.564599 0.591807

**4a-TS (Frequency: 166.3151 i cm<sup>-1</sup>)**

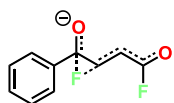

|    |   |           |           |           |
|----|---|-----------|-----------|-----------|
| 1  | C | 3.012609  | 1.566875  | 0.066534  |
| 2  | C | 1.748130  | 1.048377  | 0.337914  |
| 3  | C | 1.462013  | -0.289961 | 0.041523  |
| 4  | C | 2.456196  | -1.102365 | -0.512346 |
| 5  | C | 3.720337  | -0.581163 | -0.787740 |
| 6  | C | 3.998401  | 0.756037  | -0.502056 |
| 7  | H | 3.236346  | 2.607213  | 0.308912  |
| 8  | H | 0.977486  | 1.634024  | 0.837256  |
| 9  | H | 2.222016  | -2.146684 | -0.725260 |
| 10 | H | 4.489817  | -1.218677 | -1.226265 |
| 11 | H | 4.986781  | 1.166406  | -0.716180 |
| 12 | C | 0.103337  | -0.899486 | 0.266841  |
| 13 | O | -0.011396 | -2.097115 | 0.449818  |
| 14 | C | -1.093082 | -0.034230 | 0.035910  |
| 15 | C | -2.322552 | -0.587447 | -0.111472 |
| 16 | H | -0.931136 | 1.013271  | -0.211950 |
| 17 | H | -2.470030 | -1.655587 | 0.046396  |
| 18 | F | -0.418697 | 0.315253  | 1.926616  |
| 19 | C | -3.499033 | 0.186848  | -0.422330 |
| 20 | O | -4.626622 | -0.180862 | -0.567108 |
| 21 | F | -3.239666 | 1.511742  | -0.576754 |

**4a-IM2**

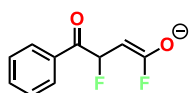

|    |   |           |           |           |
|----|---|-----------|-----------|-----------|
| 1  | C | -3.058090 | -1.560413 | -0.113363 |
| 2  | C | -1.753956 | -1.081593 | 0.004730  |
| 3  | C | -1.507188 | 0.297533  | -0.022481 |
| 4  | C | -2.581876 | 1.185229  | -0.164675 |
| 5  | C | -3.883531 | 0.706800  | -0.278833 |
| 6  | C | -4.122509 | -0.669411 | -0.254992 |
| 7  | H | -3.244321 | -2.634996 | -0.091218 |
| 8  | H | -0.930046 | -1.781537 | 0.138878  |
| 9  | H | -2.371153 | 2.255093  | -0.187495 |
| 10 | H | -4.714588 | 1.404933  | -0.388966 |
| 11 | H | -5.141879 | -1.048009 | -0.346342 |
| 12 | C | -0.122004 | 0.878776  | 0.058977  |
| 13 | O | 0.042186  | 2.074968  | -0.016215 |
| 14 | C | 1.055175  | -0.090424 | 0.230891  |
| 15 | C | 2.362820  | 0.544400  | 0.277197  |
| 16 | H | 1.010761  | -0.856267 | -0.557877 |
| 17 | H | 2.466501  | 1.522511  | 0.744873  |

18 F 0.703342 -0.800568 1.435597

19 C 3.514828 -0.049107 -0.215733

20 O 4.679305 0.307866 -0.248472

21 F 3.266746 -1.298892 -0.805005

**4b-IM1**

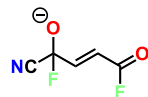

|    |   |           |           |           |
|----|---|-----------|-----------|-----------|
| 1  | C | 1.400689  | -0.447783 | 0.079498  |
| 2  | O | 1.507249  | -1.501638 | -0.591478 |
| 3  | C | -0.003268 | 0.129845  | 0.304668  |
| 4  | C | -1.048756 | -0.432576 | -0.303164 |
| 5  | H | -0.114046 | 0.995532  | 0.963876  |
| 6  | H | -0.892207 | -1.292929 | -0.956208 |
| 7  | F | 1.898193  | -0.548911 | 1.456502  |
| 8  | C | 2.286333  | 0.721039  | -0.440288 |
| 9  | N | 2.963791  | 1.528492  | -0.913952 |
| 10 | C | -2.430876 | 0.033492  | -0.139390 |
| 11 | O | -3.411161 | -0.417068 | -0.635574 |
| 12 | F | -2.535273 | 1.095966  | 0.676661  |

**4b-TS (Frequency: 291.9022 i cm<sup>-1</sup>)**

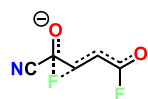

|    |   |           |           |           |
|----|---|-----------|-----------|-----------|
| 1  | C | -1.401383 | 0.575757  | -0.163063 |
| 2  | O | -1.573520 | 1.762557  | -0.065085 |
| 3  | C | -0.088555 | -0.119492 | -0.106263 |
| 4  | C | 1.060991  | 0.619539  | -0.017688 |
| 5  | H | -0.051207 | -1.148056 | -0.464150 |
| 6  | H | 1.021124  | 1.688486  | 0.186511  |
| 7  | F | -0.923409 | -0.591199 | 1.490009  |
| 8  | C | -2.580307 | -0.313329 | -0.384945 |
| 9  | N | -3.517017 | -0.949754 | -0.601269 |
| 10 | C | 2.362940  | 0.031483  | -0.124005 |
| 11 | O | 3.441081  | 0.548428  | -0.061196 |
| 12 | F | 2.321919  | -1.313665 | -0.348615 |

**4b-IM2**

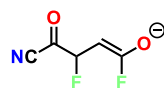

|   |   |           |           |           |
|---|---|-----------|-----------|-----------|
| 1 | C | 1.357648  | 0.535840  | -0.456295 |
| 2 | O | 1.593431  | 1.290906  | -1.362428 |
| 3 | C | 0.173783  | 0.579398  | 0.473131  |
| 4 | C | -0.692596 | -0.541918 | 0.119174  |
| 5 | H | -0.329814 | 1.545206  | 0.343430  |
| 6 | H | -0.276844 | -1.549606 | 0.077591  |

|    |   |           |           |           |
|----|---|-----------|-----------|-----------|
| 7  | F | 0.698221  | 0.523361  | 1.783581  |
| 8  | C | 2.268167  | -0.630503 | -0.212901 |
| 9  | N | 2.997691  | -1.503644 | -0.024009 |
| 10 | C | -2.057068 | -0.411558 | -0.148640 |
| 11 | O | -2.900545 | -1.227633 | -0.451894 |
| 12 | F | -2.500428 | 0.902879  | -0.048603 |

#### 4c-IMI

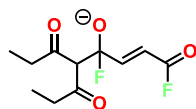

|    |   |           |           |           |
|----|---|-----------|-----------|-----------|
| 1  | C | -0.275211 | -0.755413 | -0.304994 |
| 2  | O | -0.093283 | -0.552834 | -1.538572 |
| 3  | C | -1.708802 | -0.609680 | 0.219834  |
| 4  | C | -2.683389 | -0.188442 | -0.589995 |
| 5  | H | -1.913096 | -0.862899 | 1.263898  |
| 6  | H | -2.453297 | 0.056260  | -1.628443 |
| 7  | F | -0.000875 | -2.176569 | 0.101841  |
| 8  | C | 0.695960  | 0.011159  | 0.687109  |
| 9  | H | 0.353349  | -0.121516 | 1.721785  |
| 10 | C | 0.554042  | 1.492845  | 0.383866  |
| 11 | O | -0.229859 | 2.155153  | 1.030745  |
| 12 | C | 2.104727  | -0.569170 | 0.651358  |
| 13 | O | 2.708043  | -0.699383 | 1.695769  |
| 14 | C | 1.345572  | 2.099927  | -0.749951 |
| 15 | H | 1.331218  | 1.383303  | -1.583002 |
| 16 | H | 0.812732  | 3.009655  | -1.059364 |
| 17 | C | 2.773220  | 2.459244  | -0.323071 |
| 18 | H | 3.344077  | 1.583188  | 0.017116  |
| 19 | H | 3.320295  | 2.906050  | -1.163822 |
| 20 | H | 2.758033  | 3.187696  | 0.499825  |
| 21 | C | 2.717045  | -1.019640 | -0.655961 |
| 22 | H | 2.064353  | -1.828617 | -1.017041 |
| 23 | H | 2.598362  | -0.225759 | -1.405808 |
| 24 | C | 4.163127  | -1.459924 | -0.505538 |
| 25 | H | 4.250283  | -2.275857 | 0.224122  |
| 26 | H | 4.564656  | -1.807752 | -1.466507 |
| 27 | H | 4.794053  | -0.632714 | -0.148540 |
| 28 | C | -4.078613 | -0.034357 | -0.170451 |
| 29 | O | -5.000752 | 0.327660  | -0.827063 |
| 30 | F | -4.281823 | -0.353998 | 1.120995  |

#### 4c-TS (Frequency: 234.6067 i cm<sup>-1</sup>)

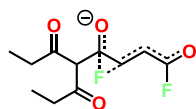

|   |   |           |          |           |
|---|---|-----------|----------|-----------|
| 1 | C | -0.389177 | 0.357035 | -0.412911 |
| 2 | O | -0.198208 | 0.438616 | -1.605420 |
| 3 | C | -1.759646 | 0.157225 | 0.157847  |

|    |   |           |           |           |
|----|---|-----------|-----------|-----------|
| 4  | C | -2.842888 | 0.139439  | -0.673990 |
| 5  | H | -1.896576 | 0.345193  | 1.221355  |
| 6  | H | -2.711823 | 0.092288  | -1.754373 |
| 7  | F | -0.945444 | -1.545160 | 0.541536  |
| 8  | C | 0.752530  | 0.431083  | 0.595948  |
| 9  | H | 0.349352  | 0.545417  | 1.607334  |
| 10 | C | 1.668021  | 1.640411  | 0.372495  |
| 11 | O | 1.734781  | 2.496780  | 1.222496  |
| 12 | C | 1.581653  | -0.868629 | 0.636093  |
| 13 | O | 2.109932  | -1.175247 | 1.677554  |
| 14 | C | 2.519456  | 1.708079  | -0.875156 |
| 15 | H | 2.028537  | 1.171605  | -1.696194 |
| 16 | H | 2.602345  | 2.769340  | -1.148704 |
| 17 | C | 3.918458  | 1.144536  | -0.592931 |
| 18 | H | 3.887972  | 0.081454  | -0.312708 |
| 19 | H | 4.551633  | 1.238063  | -1.484686 |
| 20 | H | 4.392834  | 1.697826  | 0.229134  |
| 21 | C | 1.737752  | -1.686252 | -0.621906 |
| 22 | H | 0.726922  | -2.080763 | -0.807710 |
| 23 | H | 1.958420  | -1.014770 | -1.465443 |
| 24 | C | 2.766375  | -2.794451 | -0.476899 |
| 25 | H | 2.504328  | -3.459359 | 0.356521  |
| 26 | H | 2.822332  | -3.392930 | -1.395392 |
| 27 | H | 3.767066  | -2.386878 | -0.271192 |
| 28 | C | -4.192877 | 0.119547  | -0.187818 |
| 29 | O | -5.222065 | 0.094855  | -0.798601 |
| 30 | F | -4.269757 | 0.152420  | 1.172820  |

#### 4c-IM2

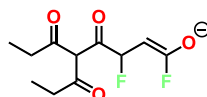

|    |   |           |           |           |
|----|---|-----------|-----------|-----------|
| 1  | C | 0.251953  | -0.936949 | -0.092824 |
| 2  | O | 0.214735  | -1.658612 | -1.058050 |
| 3  | C | 1.572330  | -0.402095 | 0.460193  |
| 4  | C | 2.498429  | 0.080586  | -0.557787 |
| 5  | H | 2.020158  | -1.217044 | 1.052035  |
| 6  | H | 2.118717  | 0.563988  | -1.458289 |
| 7  | F | 1.198272  | 0.579006  | 1.439746  |
| 8  | C | -1.006950 | -0.570059 | 0.689113  |
| 9  | H | -0.841840 | -0.825055 | 1.744916  |
| 10 | C | -2.210614 | -1.389556 | 0.214881  |
| 11 | O | -2.700020 | -2.211178 | 0.950995  |
| 12 | C | -1.328957 | 0.936531  | 0.673439  |
| 13 | O | -1.982017 | 1.407476  | 1.570667  |
| 14 | C | -2.789853 | -1.109718 | -1.153811 |
| 15 | H | -2.003715 | -0.761329 | -1.836130 |
| 16 | H | -3.172269 | -2.065616 | -1.537693 |
| 17 | C | -3.938175 | -0.096649 | -1.062307 |

|    |   |           |           |           |
|----|---|-----------|-----------|-----------|
| 18 | H | -3.598370 | 0.886182  | -0.704782 |
| 19 | H | -4.394543 | 0.045795  | -2.050240 |
| 20 | H | -4.712446 | -0.458561 | -0.372059 |
| 21 | C | -0.846047 | 1.749817  | -0.502208 |
| 22 | H | 0.256431  | 1.729189  | -0.454729 |
| 23 | H | -1.111726 | 1.211060  | -1.427527 |
| 24 | C | -1.372453 | 3.174201  | -0.499442 |
| 25 | H | -1.084414 | 3.688364  | 0.426690  |
| 26 | H | -0.970674 | 3.736648  | -1.351472 |
| 27 | H | -2.469759 | 3.188903  | -0.561165 |
| 28 | C | 3.877042  | -0.031989 | -0.436153 |
| 29 | O | 4.797140  | 0.314273  | -1.152380 |
| 30 | F | 4.255674  | -0.685995 | 0.742701  |

#### 4d-IM1

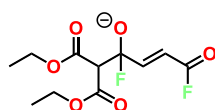

|    |   |           |           |           |
|----|---|-----------|-----------|-----------|
| 1  | C | -0.801583 | -0.820527 | -0.407005 |
| 2  | O | -0.573603 | -0.437197 | -1.581008 |
| 3  | C | -2.220575 | -0.604332 | 0.136399  |
| 4  | C | -3.142243 | 0.005229  | -0.613089 |
| 5  | H | -2.462789 | -0.974481 | 1.136911  |
| 6  | H | -2.871447 | 0.366351  | -1.606647 |
| 7  | F | -0.692806 | -2.311037 | -0.225062 |
| 8  | C | 0.241165  | -0.354590 | 0.707014  |
| 9  | H | -0.176605 | -0.536188 | 1.705878  |
| 10 | C | 0.410389  | 1.134705  | 0.565341  |
| 11 | O | -0.483697 | 1.916518  | 0.774411  |
| 12 | C | 1.509777  | -1.168114 | 0.639133  |
| 13 | O | 1.954368  | -1.778004 | 1.582810  |
| 14 | C | 1.846979  | 2.917792  | 0.034141  |
| 15 | H | 1.612559  | 3.422863  | 0.982484  |
| 16 | H | 1.144609  | 3.294797  | -0.723193 |
| 17 | C | 3.305991  | -1.888706 | -0.701874 |
| 18 | H | 3.225532  | -2.842244 | -0.163197 |
| 19 | H | 3.391388  | -2.092652 | -1.775964 |
| 20 | C | -4.523047 | 0.228041  | -0.181204 |
| 21 | O | -5.400723 | 0.755478  | -0.785192 |
| 22 | F | -4.773530 | -0.239770 | 1.056577  |
| 23 | C | 4.481985  | -1.073712 | -0.201299 |
| 24 | H | 5.418849  | -1.621821 | -0.370778 |
| 25 | H | 4.538812  | -0.113882 | -0.732586 |
| 26 | H | 4.382722  | -0.878981 | 0.874965  |
| 27 | C | 3.285509  | 3.121329  | -0.376697 |
| 28 | H | 3.492521  | 2.609724  | -1.326423 |
| 29 | H | 3.488294  | 4.192392  | -0.506335 |
| 30 | H | 3.966501  | 2.727805  | 0.390226  |
| 31 | O | 2.081155  | -1.165831 | -0.560072 |

|    |   |          |          |          |
|----|---|----------|----------|----------|
| 32 | O | 1.632499 | 1.511648 | 0.197283 |
|----|---|----------|----------|----------|

#### 4d-TS (Frequency: 225.5265 i cm<sup>-1</sup>)

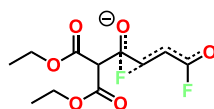

|    |   |           |           |           |
|----|---|-----------|-----------|-----------|
| 1  | C | 0.913809  | -0.429107 | -0.441028 |
| 2  | O | 0.756487  | -0.591558 | -1.625720 |
| 3  | C | 2.262148  | -0.223669 | 0.171948  |
| 4  | C | 3.379137  | -0.288983 | -0.608872 |
| 5  | H | 2.349552  | -0.323509 | 1.252575  |
| 6  | H | 3.295237  | -0.323107 | -1.694514 |
| 7  | F | 1.443175  | 1.521660  | 0.390101  |
| 8  | C | -0.284381 | -0.419921 | 0.514520  |
| 9  | H | 0.045300  | -0.648052 | 1.537282  |
| 10 | C | -1.275806 | -1.504218 | 0.122676  |
| 11 | O | -0.958717 | -2.607689 | -0.231948 |
| 12 | C | -0.936609 | 0.951037  | 0.582687  |
| 13 | O | -1.234107 | 1.503252  | 1.608335  |
| 14 | C | -3.554774 | -2.078086 | -0.016522 |
| 15 | H | -3.385379 | -2.957109 | 0.621502  |
| 16 | H | -3.447880 | -2.399849 | -1.062311 |
| 17 | C | -1.840357 | 2.700727  | -0.698228 |
| 18 | H | -1.356787 | 3.361780  | 0.033593  |
| 19 | H | -1.621021 | 3.068298  | -1.707810 |
| 20 | C | 4.708494  | -0.255860 | -0.067096 |
| 21 | O | 5.761958  | -0.296329 | -0.633415 |
| 22 | F | 4.727640  | -0.184927 | 1.293627  |
| 23 | C | -3.333443 | 2.606408  | -0.458005 |
| 24 | H | -3.794745 | 3.597137  | -0.569918 |
| 25 | H | -3.796147 | 1.923494  | -1.183765 |
| 26 | H | -3.535872 | 2.239018  | 0.556672  |
| 27 | C | -4.893763 | -1.433405 | 0.246972  |
| 28 | H | -5.039613 | -0.560597 | -0.403210 |
| 29 | H | -5.697387 | -2.154034 | 0.047632  |
| 30 | H | -4.967351 | -1.109387 | 1.293794  |
| 31 | O | -1.220674 | 1.413557  | -0.630294 |
| 32 | O | -2.536443 | -1.108008 | 0.266869  |

#### 4d-IM2

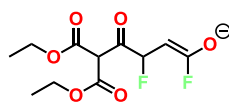

|   |   |          |           |           |
|---|---|----------|-----------|-----------|
| 1 | C | 0.548144 | -1.150733 | 0.076128  |
| 2 | O | 0.349486 | -1.839665 | -0.889697 |
| 3 | C | 1.939889 | -0.650450 | 0.450056  |
| 4 | C | 2.616823 | 0.082908  | -0.614931 |
| 5 | H | 2.524342 | -1.535917 | 0.744726  |
| 6 | H | 2.050583 | 0.778068  | -1.233901 |

|    |   |           |           |           |
|----|---|-----------|-----------|-----------|
| 7  | F | 1.760919  | 0.090400  | 1.663055  |
| 8  | C | -0.593296 | -0.769585 | 1.029302  |
| 9  | H | -0.377196 | -1.169472 | 2.027914  |
| 10 | C | -1.879195 | -1.397485 | 0.525951  |
| 11 | O | -2.266616 | -2.487594 | 0.846913  |
| 12 | C | -0.719839 | 0.740393  | 1.148432  |
| 13 | O | -1.191762 | 1.306949  | 2.096398  |
| 14 | C | -3.709829 | -1.111724 | -0.924994 |
| 15 | H | -4.406254 | -1.382053 | -0.118716 |
| 16 | H | -3.463022 | -2.030288 | -1.476483 |
| 17 | C | -0.357780 | 2.770470  | -0.004972 |
| 18 | H | -0.086242 | 3.177215  | 0.978033  |
| 19 | H | 0.401798  | 3.067064  | -0.737552 |
| 20 | C | 3.981416  | -0.013067 | -0.846539 |
| 21 | O | 4.720361  | 0.525838  | -1.649785 |
| 22 | F | 4.609316  | -0.923957 | 0.014696  |
| 23 | C | -1.745478 | 3.207077  | -0.425678 |
| 24 | H | -1.780049 | 4.300667  | -0.520912 |
| 25 | H | -2.009751 | 2.762886  | -1.394928 |
| 26 | H | -2.488718 | 2.898872  | 0.321988  |
| 27 | C | -4.270104 | -0.039387 | -1.826929 |
| 28 | H | -3.548594 | 0.220465  | -2.613129 |
| 29 | H | -5.190774 | -0.399967 | -2.303530 |
| 30 | H | -4.506564 | 0.865984  | -1.251835 |
| 31 | O | -0.271596 | 1.340036  | 0.051814  |
| 32 | O | -2.504395 | -0.603318 | -0.335192 |

#### 5a-IMI1

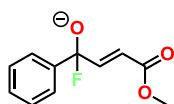

|    |   |           |           |           |
|----|---|-----------|-----------|-----------|
| 1  | C | 3.154609  | 1.656837  | 0.615736  |
| 2  | C | 2.109119  | 0.796440  | 0.951965  |
| 3  | C | 1.753497  | -0.256155 | 0.101095  |
| 4  | C | 2.465049  | -0.438247 | -1.085078 |
| 5  | C | 3.511709  | 0.419893  | -1.427300 |
| 6  | C | 3.857642  | 1.471901  | -0.577525 |
| 7  | H | 3.427873  | 2.472489  | 1.288235  |
| 8  | H | 1.567844  | 0.926178  | 1.891284  |
| 9  | H | 2.177377  | -1.278490 | -1.719154 |
| 10 | H | 4.062264  | 0.267743  | -2.358037 |
| 11 | H | 4.675472  | 2.144894  | -0.841607 |
| 12 | C | 0.586014  | -1.221937 | 0.413303  |
| 13 | O | 0.579371  | -2.319781 | -0.222333 |
| 14 | C | -0.720477 | -0.408946 | 0.389357  |
| 15 | C | -1.743634 | -0.786152 | -0.380437 |
| 16 | H | -0.793211 | 0.492678  | 1.005789  |
| 17 | H | -1.640082 | -1.688631 | -0.987045 |
| 18 | F | 0.729764  | -1.408233 | 1.902146  |

|    |   |           |           |           |
|----|---|-----------|-----------|-----------|
| 19 | C | -3.034980 | -0.076332 | -0.472890 |
| 20 | O | -3.959195 | -0.434853 | -1.165599 |
| 21 | O | -3.100866 | 1.022048  | 0.292209  |
| 22 | C | -4.323183 | 1.742624  | 0.245892  |
| 23 | H | -5.158267 | 1.110795  | 0.577051  |
| 24 | H | -4.204789 | 2.596034  | 0.920172  |
| 25 | H | -4.529032 | 2.091532  | -0.774924 |

#### 5a-TS (Frequency: 219.4071 i cm<sup>-1</sup>)

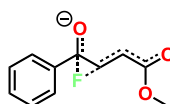

|    |   |           |           |           |
|----|---|-----------|-----------|-----------|
| 1  | C | 3.196899  | 1.716730  | 0.237587  |
| 2  | C | 2.003281  | 1.030003  | 0.452555  |
| 3  | C | 1.862258  | -0.285208 | -0.007625 |
| 4  | C | 2.928408  | -0.907208 | -0.666154 |
| 5  | C | 4.118705  | -0.215911 | -0.886945 |
| 6  | C | 4.252291  | 1.099018  | -0.437826 |
| 7  | H | 3.310063  | 2.737610  | 0.606444  |
| 8  | H | 1.181887  | 1.456986  | 1.027300  |
| 9  | H | 2.806688  | -1.937291 | -1.005310 |
| 10 | H | 4.943869  | -0.702220 | -1.409769 |
| 11 | H | 5.183478  | 1.642010  | -0.608768 |
| 12 | C | 0.587104  | -1.065970 | 0.161477  |
| 13 | O | 0.617480  | -2.279638 | 0.207612  |
| 14 | C | -0.703676 | -0.309180 | 0.150076  |
| 15 | C | -1.880414 | -0.976844 | -0.029037 |
| 16 | H | -0.661013 | 0.755224  | -0.075470 |
| 17 | H | -1.910934 | -2.063944 | 0.044393  |
| 18 | F | -0.155246 | 0.031290  | 1.964968  |
| 19 | C | -3.150854 | -0.315889 | -0.243569 |
| 20 | O | -4.222349 | -0.872370 | -0.397787 |
| 21 | O | -3.063902 | 1.037122  | -0.280673 |
| 22 | C | -4.273821 | 1.729226  | -0.521640 |
| 23 | H | -5.012501 | 1.518045  | 0.264192  |
| 24 | H | -4.027512 | 2.796186  | -0.524528 |
| 25 | H | -4.707730 | 1.442277  | -1.489796 |

#### 5a-IM2

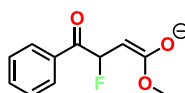

|   |   |          |           |           |
|---|---|----------|-----------|-----------|
| 1 | C | 3.242014 | 1.720355  | 0.114587  |
| 2 | C | 2.003854 | 1.088064  | 0.221452  |
| 3 | C | 1.887410 | -0.280498 | -0.056342 |
| 4 | C | 3.026014 | -1.002802 | -0.437102 |
| 5 | C | 4.261522 | -0.371177 | -0.543835 |
| 6 | C | 4.370209 | 0.994105  | -0.268575 |
| 7 | H | 3.326803 | 2.785353  | 0.335234  |

|    |   |           |           |           |
|----|---|-----------|-----------|-----------|
| 8  | H | 1.130660  | 1.652508  | 0.546015  |
| 9  | H | 2.917341  | -2.066869 | -0.650672 |
| 10 | H | 5.142551  | -0.940740 | -0.843307 |
| 11 | H | 5.337323  | 1.492737  | -0.351892 |
| 12 | C | 0.575260  | -1.017380 | 0.009845  |
| 13 | O | 0.540424  | -2.208896 | -0.200955 |
| 14 | C | -0.684597 | -0.210489 | 0.342580  |
| 15 | C | -1.923752 | -0.953672 | 0.284782  |
| 16 | H | -0.722917 | 0.692143  | -0.284956 |
| 17 | H | -1.926629 | -2.012554 | 0.540450  |
| 18 | F | -0.348242 | 0.317020  | 1.664551  |
| 19 | C | -3.156503 | -0.368681 | -0.034368 |
| 20 | O | -4.267414 | -0.906065 | -0.101117 |
| 21 | O | -3.069791 | 0.991572  | -0.322528 |
| 22 | C | -4.262200 | 1.601709  | -0.747259 |
| 23 | H | -5.058896 | 1.509802  | 0.005928  |
| 24 | H | -4.035431 | 2.662705  | -0.911101 |
| 25 | H | -4.637766 | 1.161639  | -1.684438 |

#### 5b-IM1

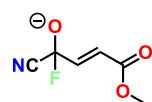

|    |   |           |           |           |
|----|---|-----------|-----------|-----------|
| 1  | C | 1.873121  | -0.341712 | 0.209267  |
| 2  | O | 2.162414  | -1.510313 | -0.144105 |
| 3  | C | 0.399443  | 0.077074  | 0.227880  |
| 4  | C | -0.537623 | -0.750505 | -0.233123 |
| 5  | H | 0.144797  | 1.062939  | 0.627368  |
| 6  | H | -0.243212 | -1.725070 | -0.628164 |
| 7  | F | 2.294615  | -0.000048 | 1.576812  |
| 8  | C | 2.642871  | 0.757134  | -0.583127 |
| 9  | N | 3.246174  | 1.492725  | -1.239515 |
| 10 | C | -1.987885 | -0.450482 | -0.241120 |
| 11 | O | -2.830679 | -1.211677 | -0.652036 |
| 12 | O | -2.283987 | 0.755108  | 0.254588  |
| 13 | C | -3.662020 | 1.101085  | 0.278745  |
| 14 | H | -4.226724 | 0.391381  | 0.897754  |
| 15 | H | -3.719929 | 2.106091  | 0.706579  |
| 16 | H | -4.079112 | 1.095513  | -0.736950 |

#### 5b-TS (Frequency: 286.1846 i cm<sup>-1</sup>)

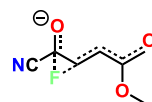

|   |   |           |           |           |
|---|---|-----------|-----------|-----------|
| 1 | C | 1.873121  | -0.341712 | 0.209267  |
| 2 | O | 2.162414  | -1.510313 | -0.144105 |
| 3 | C | 0.399443  | 0.077074  | 0.227880  |
| 4 | C | -0.537623 | -0.750505 | -0.233123 |
| 5 | H | 0.144797  | 1.062939  | 0.627368  |

|    |   |           |           |           |
|----|---|-----------|-----------|-----------|
| 6  | H | -0.243212 | -1.725070 | -0.628164 |
| 7  | F | 2.294615  | -0.000048 | 1.576812  |
| 8  | C | 2.642871  | 0.757134  | -0.583127 |
| 9  | N | 3.246174  | 1.492725  | -1.239515 |
| 10 | C | -1.987885 | -0.450482 | -0.241120 |
| 11 | O | -2.830679 | -1.211677 | -0.652036 |
| 12 | O | -2.283987 | 0.755108  | 0.254588  |
| 13 | C | -3.662020 | 1.101085  | 0.278745  |
| 14 | H | -4.226724 | 0.391381  | 0.897754  |
| 15 | H | -3.719929 | 2.106091  | 0.706579  |
| 16 | H | -4.079112 | 1.095513  | -0.736950 |

#### 5b-IM2

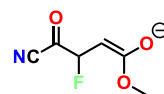

|    |   |           |           |           |
|----|---|-----------|-----------|-----------|
| 1  | C | -1.691554 | 0.616177  | 0.450697  |
| 2  | O | -1.830910 | 1.418447  | 1.341598  |
| 3  | C | -0.563732 | 0.542513  | -0.535943 |
| 4  | C | 0.187791  | -0.652530 | -0.180111 |
| 5  | H | 0.041899  | 1.451808  | -0.438888 |
| 6  | H | -0.326526 | -1.613227 | -0.125474 |
| 7  | F | -1.141325 | 0.529734  | -1.831843 |
| 8  | C | -2.688812 | -0.494338 | 0.304490  |
| 9  | N | -3.498025 | -1.308008 | 0.183341  |
| 10 | C | 1.580503  | -0.665405 | 0.064681  |
| 11 | O | 2.275315  | -1.633761 | 0.364691  |
| 12 | O | 2.173763  | 0.574016  | -0.052032 |
| 13 | C | 3.560823  | 0.614703  | 0.191476  |
| 14 | H | 4.113688  | -0.021359 | -0.515369 |
| 15 | H | 3.871851  | 1.658518  | 0.067176  |
| 16 | H | 3.801731  | 0.276360  | 1.209964  |

#### 5c-IM1

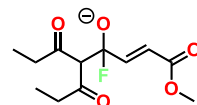

|    |   |           |           |           |
|----|---|-----------|-----------|-----------|
| 1  | C | 0.092596  | -0.746295 | -0.402120 |
| 2  | O | 0.364977  | -0.534658 | -1.617904 |
| 3  | C | -1.369729 | -0.595025 | 0.027772  |
| 4  | C | -2.290980 | -0.155275 | -0.830587 |
| 5  | H | -1.642379 | -0.859058 | 1.053542  |
| 6  | H | -1.992494 | 0.099442  | -1.849604 |
| 7  | F | 0.338718  | -2.176466 | 0.008282  |
| 8  | C | 1.003823  | -0.001279 | 0.664799  |
| 9  | H | 0.593438  | -0.150728 | 1.672052  |
| 10 | C | 0.896724  | 1.486315  | 0.384286  |
| 11 | O | 0.098324  | 2.152482  | 1.009650  |
| 12 | C | 2.407822  | -0.590955 | 0.709517  |

|    |   |           |           |           |
|----|---|-----------|-----------|-----------|
| 13 | O | 2.942062  | -0.746708 | 1.787938  |
| 14 | C | 1.748039  | 2.100715  | -0.701720 |
| 15 | H | 1.777222  | 1.391852  | -1.540743 |
| 16 | H | 1.235700  | 3.015627  | -1.030249 |
| 17 | C | 3.150878  | 2.451047  | -0.192826 |
| 18 | H | 3.697740  | 1.569346  | 0.171773  |
| 19 | H | 3.746688  | 2.902318  | -0.997352 |
| 20 | H | 3.091882  | 3.172610  | 0.634223  |
| 21 | C | 3.099868  | -1.022189 | -0.564027 |
| 22 | H | 2.470311  | -1.826749 | -0.973184 |
| 23 | H | 3.023187  | -0.219802 | -1.309947 |
| 24 | C | 4.534779  | -1.463773 | -0.332724 |
| 25 | H | 4.578752  | -2.286740 | 0.392833  |
| 26 | H | 4.993063  | -1.802168 | -1.271454 |
| 27 | H | 5.143533  | -0.640293 | 0.068913  |
| 28 | C | -3.724542 | 0.013805  | -0.510459 |
| 29 | O | -4.551389 | 0.406016  | -1.299911 |
| 30 | O | -4.033807 | -0.309573 | 0.750909  |
| 31 | C | -5.398776 | -0.164587 | 1.115768  |
| 32 | H | -5.471444 | -0.464743 | 2.165204  |
| 33 | H | -5.722233 | 0.877945  | 0.995517  |
| 34 | H | -6.035775 | -0.806165 | 0.492412  |

**5c-TS (Frequency: 270.2855 i cm<sup>-1</sup>)**

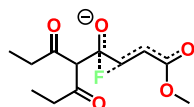

|    |   |           |           |           |
|----|---|-----------|-----------|-----------|
| 1  | C | 0.002830  | 0.416243  | -0.518220 |
| 2  | O | 0.269191  | 0.556367  | -1.689782 |
| 3  | C | -1.388049 | 0.121924  | -0.033291 |
| 4  | C | -2.419486 | 0.088033  | -0.943240 |
| 5  | H | -1.613972 | 0.402251  | 0.996021  |
| 6  | H | -2.208761 | 0.009398  | -2.009407 |
| 7  | F | -0.701763 | -1.480067 | 0.468754  |
| 8  | C | 1.079928  | 0.464856  | 0.563900  |
| 9  | H | 0.612630  | 0.605949  | 1.544175  |
| 10 | C | 2.050314  | 1.638356  | 0.389391  |
| 11 | O | 2.076886  | 2.511493  | 1.224389  |
| 12 | C | 1.855066  | -0.863921 | 0.672092  |
| 13 | O | 2.310051  | -1.176168 | 1.745599  |
| 14 | C | 2.998850  | 1.653091  | -0.788076 |
| 15 | H | 2.549931  | 1.128142  | -1.639870 |
| 16 | H | 3.147665  | 2.706359  | -1.064428 |
| 17 | C | 4.346778  | 1.035201  | -0.393528 |
| 18 | H | 4.251225  | -0.023409 | -0.111362 |
| 19 | H | 5.050954  | 1.095661  | -1.233388 |
| 20 | H | 4.778382  | 1.575484  | 0.460207  |
| 21 | C | 2.049351  | -1.702820 | -0.566498 |
| 22 | H | 1.036005  | -2.058940 | -0.809455 |

|    |   |           |           |           |
|----|---|-----------|-----------|-----------|
| 23 | H | 2.348527  | -1.050565 | -1.401379 |
| 24 | C | 3.018769  | -2.852150 | -0.351478 |
| 25 | H | 2.680255  | -3.493660 | 0.472652  |
| 26 | H | 3.100816  | -3.464377 | -1.258772 |
| 27 | H | 4.022601  | -2.484877 | -0.092753 |
| 28 | C | -3.808642 | 0.074412  | -0.563331 |
| 29 | O | -4.760664 | 0.041935  | -1.324830 |
| 30 | O | -4.008538 | 0.123525  | 0.782225  |
| 31 | C | -5.356151 | 0.160810  | 1.206276  |
| 32 | H | -5.338536 | 0.197425  | 2.300794  |
| 33 | H | -5.872919 | 1.047138  | 0.811553  |
| 34 | H | -5.901688 | -0.732791 | 0.871834  |

**5c-IM2**

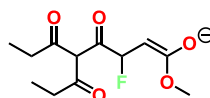

|    |   |           |           |           |
|----|---|-----------|-----------|-----------|
| 1  | C | 0.078765  | -0.924132 | 0.161203  |
| 2  | O | 0.137804  | -1.637877 | 1.132285  |
| 3  | C | -1.245896 | -0.358411 | -0.344063 |
| 4  | C | -2.096072 | 0.202137  | 0.691291  |
| 5  | H | -1.756636 | -1.171227 | -0.886920 |
| 6  | H | -1.652489 | 0.670627  | 1.570625  |
| 7  | F | -0.871256 | 0.563503  | -1.399174 |
| 8  | C | 1.319771  | -0.605698 | -0.671591 |
| 9  | H | 1.115271  | -0.896038 | -1.711189 |
| 10 | C | 2.518996  | -1.433554 | -0.203327 |
| 11 | O | 2.964568  | -2.298496 | -0.917829 |
| 12 | C | 1.670373  | 0.892700  | -0.724407 |
| 13 | O | 2.301910  | 1.316266  | -1.660516 |
| 14 | C | 3.149633  | -1.111425 | 1.133102  |
| 15 | H | 2.394497  | -0.716671 | 1.825120  |
| 16 | H | 3.523375  | -2.059213 | 1.544607  |
| 17 | C | 4.315959  | -0.129731 | 0.962418  |
| 18 | H | 3.985832  | 0.844506  | 0.573593  |
| 19 | H | 4.807343  | 0.043885  | 1.928366  |
| 20 | H | 5.059389  | -0.538286 | 0.264277  |
| 21 | C | 1.244037  | 1.760261  | 0.433970  |
| 22 | H | 0.140284  | 1.757862  | 0.425217  |
| 23 | H | 1.532548  | 1.253126  | 1.370321  |
| 24 | C | 1.795757  | 3.172950  | 0.357228  |
| 25 | H | 1.487427  | 3.655582  | -0.579399 |
| 26 | H | 1.431659  | 3.776754  | 1.197916  |
| 27 | H | 2.894624  | 3.169786  | 0.383922  |
| 28 | C | -3.496869 | 0.177172  | 0.622212  |
| 29 | O | -4.311358 | 0.617901  | 1.438218  |
| 30 | O | -3.981340 | -0.440964 | -0.524593 |
| 31 | C | -5.379813 | -0.561725 | -0.606880 |
| 32 | H | -5.599966 | -1.056798 | -1.560697 |

|    |   |           |           |           |
|----|---|-----------|-----------|-----------|
| 33 | H | -5.787537 | -1.163652 | 0.219715  |
| 34 | H | -5.874827 | 0.420337  | -0.580378 |

### 5d-IMI

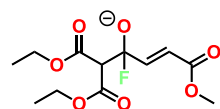

|    |   |           |           |           |
|----|---|-----------|-----------|-----------|
| 1  | C | -0.605550 | 0.691168  | 1.597382  |
| 2  | O | -0.195963 | 1.589985  | 2.369957  |
| 3  | C | 0.408821  | -0.330556 | 1.081196  |
| 4  | C | 1.712273  | -0.116265 | 1.264767  |
| 5  | H | 0.045310  | -1.177159 | 0.493749  |
| 6  | H | 2.030007  | 0.755580  | 1.840719  |
| 7  | F | -1.642546 | -0.188338 | 2.226521  |
| 8  | C | -1.444560 | 1.234633  | 0.314580  |
| 9  | H | -1.870121 | 2.174963  | 0.684230  |
| 10 | C | -2.579359 | 0.319705  | -0.049737 |
| 11 | O | -3.747076 | 0.603777  | 0.061434  |
| 12 | C | -0.526196 | 1.526978  | -0.843889 |
| 13 | O | -0.557301 | 0.982825  | -1.920952 |
| 14 | C | -3.180466 | -1.846406 | -0.735845 |
| 15 | H | -3.865101 | -1.452613 | -1.501430 |
| 16 | H | -3.767350 | -2.001342 | 0.181994  |
| 17 | C | 1.357255  | 2.771606  | -1.521236 |
| 18 | H | 0.876519  | 2.822020  | -2.507178 |
| 19 | H | 1.729007  | 3.768182  | -1.255261 |
| 20 | C | 2.790474  | -0.945202 | 0.687903  |
| 21 | O | 3.968963  | -0.713197 | 0.828567  |
| 22 | O | 2.344160  | -1.973728 | -0.042684 |
| 23 | C | 3.338136  | -2.784487 | -0.652919 |
| 24 | H | 2.804577  | -3.565840 | -1.202007 |
| 25 | H | 3.951819  | -2.187951 | -1.341244 |
| 26 | H | 3.992406  | -3.232456 | 0.106672  |
| 27 | C | -2.496156 | -3.114095 | -1.189661 |
| 28 | H | -1.824172 | -3.492673 | -0.407225 |
| 29 | H | -3.244049 | -3.886906 | -1.410288 |
| 30 | H | -1.906507 | -2.928942 | -2.097834 |
| 31 | C | 2.475245  | 1.746936  | -1.513624 |
| 32 | H | 3.218393  | 2.005830  | -2.280638 |
| 33 | H | 2.978795  | 1.719536  | -0.537598 |
| 34 | H | 2.080904  | 0.744878  | -1.735110 |
| 35 | O | -2.167902 | -0.875550 | -0.473856 |
| 36 | O | 0.361740  | 2.474119  | -0.535431 |

### 5d-TS (Frequency: 261.8994 i cm<sup>-1</sup>)

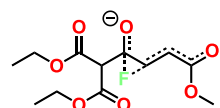

|   |   |          |           |          |
|---|---|----------|-----------|----------|
| 1 | C | 0.574071 | -0.090566 | 1.804505 |
|---|---|----------|-----------|----------|

|    |   |           |           |           |
|----|---|-----------|-----------|-----------|
| 2  | O | 0.552416  | -0.314883 | 2.988997  |
| 3  | C | -0.647076 | 0.221291  | 0.994692  |
| 4  | C | -1.897154 | -0.037305 | 1.507886  |
| 5  | H | -0.519247 | 0.190146  | -0.086037 |
| 6  | H | -2.039955 | -0.202512 | 2.575426  |
| 7  | F | -0.062000 | 1.937176  | 1.103516  |
| 8  | C | 1.911918  | -0.133653 | 1.041355  |
| 9  | H | 2.716973  | -0.223770 | 1.781632  |
| 10 | C | 2.142231  | 1.143580  | 0.245668  |
| 11 | O | 2.832249  | 2.055064  | 0.610158  |
| 12 | C | 1.985933  | -1.331916 | 0.104089  |
| 13 | O | 2.907133  | -1.540667 | -0.638311 |
| 14 | C | 1.223910  | 2.363258  | -1.540461 |
| 15 | H | 2.140022  | 2.724777  | -2.030669 |
| 16 | H | 0.936643  | 3.063459  | -0.745774 |
| 17 | C | 0.764088  | -3.180087 | -0.733269 |
| 18 | H | 1.742455  | -3.651414 | -0.890907 |
| 19 | H | 0.093175  | -3.895171 | -0.244319 |
| 20 | C | -3.083172 | -0.027671 | 0.692320  |
| 21 | O | -4.222685 | -0.238062 | 1.072118  |
| 22 | O | -2.839694 | 0.226083  | -0.626649 |
| 23 | C | -3.967036 | 0.206227  | -1.478465 |
| 24 | H | -3.602008 | 0.441585  | -2.484179 |
| 25 | H | -4.448021 | -0.782275 | -1.478032 |
| 26 | H | -4.712250 | 0.951852  | -1.167721 |
| 27 | C | 0.094928  | 2.144215  | -2.519791 |
| 28 | H | -0.795568 | 1.788721  | -1.981625 |
| 29 | H | -0.151451 | 3.085801  | -3.028186 |
| 30 | H | 0.371567  | 1.399958  | -3.279537 |
| 31 | C | 0.176917  | -2.650699 | -2.025393 |
| 32 | H | 0.011009  | -3.476227 | -2.730295 |
| 33 | H | -0.784716 | -2.154945 | -1.831817 |
| 34 | H | 0.861566  | -1.927889 | -2.490584 |
| 35 | O | 1.491032  | 1.104289  | -0.913527 |
| 36 | O | 0.912108  | -2.107666 | 0.209985  |

### 5d-IM2

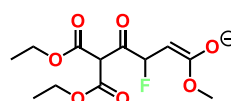

|   |   |           |           |           |
|---|---|-----------|-----------|-----------|
| 1 | C | -0.628076 | 0.144098  | 1.804471  |
| 2 | O | -0.565807 | 0.386611  | 2.980678  |
| 3 | C | 0.479802  | -0.538361 | 1.009584  |
| 4 | C | 1.804549  | -0.428329 | 1.556164  |
| 5 | H | 0.439927  | -0.241630 | -0.043901 |
| 6 | H | 1.948264  | -0.381538 | 2.635028  |
| 7 | F | -0.090538 | -1.913635 | 0.972263  |
| 8 | C | -1.907441 | 0.489663  | 1.011995  |
| 9 | H | -2.685542 | 0.787209  | 1.726369  |

|    |   |           |           |           |
|----|---|-----------|-----------|-----------|
| 10 | C | -2.391028 | -0.736189 | 0.250011  |
| 11 | O | -3.193121 | -1.522078 | 0.674499  |
| 12 | C | -1.649778 | 1.640838  | 0.046258  |
| 13 | O | -2.439057 | 2.014671  | -0.777043 |
| 14 | C | -1.787818 | -2.129617 | -1.558837 |
| 15 | H | -2.741342 | -2.234636 | -2.096811 |
| 16 | H | -1.737946 | -2.902996 | -0.781271 |
| 17 | C | 0.053636  | 3.088381  | -0.745778 |
| 18 | H | -0.764676 | 3.747701  | -1.061714 |
| 19 | H | 0.811513  | 3.679135  | -0.219387 |
| 20 | C | 2.953711  | -0.412255 | 0.745891  |
| 21 | O | 4.132780  | -0.314645 | 1.091467  |
| 22 | O | 2.674622  | -0.502166 | -0.615992 |
| 23 | C | 3.782927  | -0.394354 | -1.475375 |
| 24 | H | 3.402069  | -0.508642 | -2.497923 |
| 25 | H | 4.280285  | 0.583173  | -1.378520 |
| 26 | H | 4.531243  | -1.174277 | -1.271785 |
| 27 | C | -0.594022 | -2.186225 | -2.482360 |
| 28 | H | 0.328194  | -2.052578 | -1.899396 |
| 29 | H | -0.556804 | -3.158836 | -2.990280 |
| 30 | H | -0.649837 | -1.396414 | -3.244018 |
| 31 | C | 0.646656  | 2.314308  | -1.905444 |
| 32 | H | 1.100153  | 3.004363  | -2.629548 |
| 33 | H | 1.416668  | 1.618446  | -1.540545 |
| 34 | H | -0.135250 | 1.736254  | -2.418816 |
| 35 | O | -1.759498 | -0.851763 | -0.911354 |
| 36 | O | -0.443768 | 2.165150  | 0.235581  |

**6a-IMI**

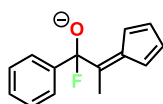

|    |   |           |           |           |
|----|---|-----------|-----------|-----------|
| 1  | C | 2.437753  | -2.108232 | -0.091686 |
| 2  | C | 1.393334  | -1.324129 | 0.394925  |
| 3  | C | 1.434991  | 0.070754  | 0.293159  |
| 4  | C | 2.550467  | 0.669768  | -0.298484 |
| 5  | C | 3.604252  | -0.112038 | -0.781228 |
| 6  | C | 3.550334  | -1.502022 | -0.682276 |
| 7  | H | 2.389642  | -3.195838 | -0.007866 |
| 8  | H | 0.522553  | -1.783985 | 0.868687  |
| 9  | H | 2.590401  | 1.757231  | -0.365783 |
| 10 | H | 4.473632  | 0.368813  | -1.234477 |
| 11 | H | 4.372008  | -2.112451 | -1.061249 |
| 12 | C | 0.238102  | 0.862094  | 0.891994  |
| 13 | O | -0.118814 | 0.496762  | 2.052215  |
| 14 | C | -0.843643 | 0.927442  | -0.226645 |
| 15 | F | 0.744362  | 2.276846  | 0.882743  |
| 16 | C | -2.991949 | 0.033811  | -1.228110 |
| 17 | C | -2.321209 | -0.850161 | 0.842043  |

|    |   |           |           |           |
|----|---|-----------|-----------|-----------|
| 18 | C | -3.899834 | -0.894826 | -0.830643 |
| 19 | H | -3.030609 | 0.614650  | -2.147444 |
| 20 | C | -3.480048 | -1.447383 | 0.459645  |
| 21 | H | -1.739331 | -1.002802 | 1.745275  |
| 22 | H | -4.795936 | -1.191196 | -1.376147 |
| 23 | H | -4.022402 | -2.214273 | 1.013063  |
| 24 | C | -1.940453 | 0.121579  | -0.199612 |
| 25 | C | -0.575911 | 1.870773  | -1.358571 |
| 26 | H | -0.625506 | 2.902352  | -0.981581 |
| 27 | H | 0.452223  | 1.733490  | -1.726184 |
| 28 | H | -1.272528 | 1.753728  | -2.195768 |

**6a-TS (Frequency: 222.4965 i cm<sup>-1</sup>)**

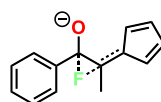

|    |   |           |           |           |
|----|---|-----------|-----------|-----------|
| 1  | C | 3.678751  | -1.047846 | -1.002619 |
| 2  | C | 2.317065  | -1.190115 | -0.733893 |
| 3  | C | 1.659267  | -0.280213 | 0.102231  |
| 4  | C | 2.386285  | 0.760301  | 0.692222  |
| 5  | C | 3.751045  | 0.889463  | 0.435986  |
| 6  | C | 4.399115  | -0.007002 | -0.416298 |
| 7  | H | 4.179130  | -1.756384 | -1.664863 |
| 8  | H | 1.755969  | -2.016446 | -1.175482 |
| 9  | H | 1.841870  | 1.432886  | 1.353932  |
| 10 | H | 4.315112  | 1.696804  | 0.906827  |
| 11 | H | 5.465893  | 0.102543  | -0.618801 |
| 12 | C | 0.191350  | -0.550555 | 0.375912  |
| 13 | O | -0.097468 | -1.625953 | 0.861297  |
| 14 | C | -0.844507 | 0.417925  | -0.149955 |
| 15 | F | -0.196203 | 1.126224  | 1.631889  |
| 16 | C | -3.238388 | 0.895874  | -0.790434 |
| 17 | C | -2.868749 | -1.061254 | 0.413077  |
| 18 | C | -4.438355 | 0.262329  | -0.610213 |
| 19 | H | -3.089595 | 1.833107  | -1.323916 |
| 20 | C | -4.207279 | -0.955115 | 0.143290  |
| 21 | H | -2.372958 | -1.854854 | 0.961416  |
| 22 | H | -5.407233 | 0.608624  | -0.970853 |
| 23 | H | -4.978612 | -1.665315 | 0.443214  |
| 24 | C | -2.192107 | 0.094108  | -0.165222 |
| 25 | C | -0.345466 | 1.582476  | -0.956556 |
| 26 | H | 0.570218  | 1.992026  | -0.524879 |
| 27 | H | -0.126388 | 1.257601  | -1.987155 |
| 28 | H | -1.095994 | 2.378756  | -1.001988 |

**6a-IM2**

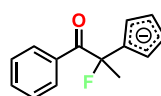



|    |   |           |           |           |
|----|---|-----------|-----------|-----------|
| 1  | C | 3.828455  | 0.066199  | 0.686565  |
| 2  | C | 2.632046  | -0.612638 | 0.897932  |
| 3  | C | 1.485339  | -0.289159 | 0.159063  |
| 4  | C | 1.553461  | 0.735376  | -0.796478 |
| 5  | C | 2.749616  | 1.422773  | -0.997635 |
| 6  | C | 3.888007  | 1.088187  | -0.263080 |
| 7  | H | 4.715598  | -0.198224 | 1.263904  |
| 8  | H | 2.562643  | -1.406659 | 1.642279  |
| 9  | H | 0.667080  | 1.000001  | -1.369035 |
| 10 | H | 2.793289  | 2.224486  | -1.736269 |
| 11 | H | 4.823175  | 1.625271  | -0.430291 |
| 12 | C | 0.235411  | -1.069070 | 0.473483  |
| 13 | O | 0.200533  | -1.782980 | 1.453638  |
| 14 | C | -0.993623 | -0.987013 | -0.443983 |
| 15 | F | -0.503916 | -0.833055 | -1.770731 |
| 16 | C | -3.276675 | 0.199462  | -0.135893 |
| 17 | C | -1.440782 | 1.396663  | 0.531688  |
| 18 | C | -3.717167 | 1.440969  | 0.352712  |
| 19 | H | -3.913626 | -0.597171 | -0.522878 |
| 20 | C | -2.583422 | 2.179329  | 0.768504  |
| 21 | H | -0.414561 | 1.683260  | 0.763597  |
| 22 | H | -4.755322 | 1.775334  | 0.401981  |
| 23 | H | -2.591526 | 3.180727  | 1.203024  |
| 24 | C | -1.860532 | 0.161352  | -0.037768 |
| 25 | C | -1.713984 | -2.326264 | -0.450306 |
| 26 | H | -1.028225 | -3.120931 | -0.776304 |
| 27 | H | -2.088474 | -2.565612 | 0.550343  |
| 28 | H | -2.555974 | -2.276141 | -1.151682 |

**6b-IM1**

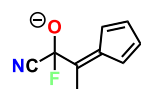

|    |   |           |           |           |
|----|---|-----------|-----------|-----------|
| 1  | C | 1.372892  | -0.395374 | 0.413556  |
| 2  | O | 1.141499  | -1.543429 | 0.858100  |
| 3  | C | 0.220778  | 0.612572  | 0.165728  |
| 4  | F | 2.292346  | 0.380337  | 1.264612  |
| 5  | C | 2.198470  | -0.404739 | -0.916864 |
| 6  | N | 2.784147  | -0.532614 | -1.905495 |
| 7  | C | -2.234129 | 1.066640  | -0.216392 |
| 8  | C | -1.595139 | -1.176270 | 0.108781  |
| 9  | C | -3.335951 | 0.280216  | -0.280396 |
| 10 | H | -2.208848 | 2.148893  | -0.323764 |
| 11 | C | -2.936029 | -1.119287 | -0.081551 |
| 12 | H | -0.970491 | -2.044842 | 0.284724  |
| 13 | H | -4.357337 | 0.618507  | -0.453936 |
| 14 | H | -3.620707 | -1.967257 | -0.092158 |
| 15 | C | -1.065203 | 0.200964  | 0.036867  |
| 16 | C | 0.638298  | 2.045801  | 0.040827  |

|    |   |           |          |           |
|----|---|-----------|----------|-----------|
| 17 | H | 1.504947  | 2.128593 | -0.633289 |
| 18 | H | -0.161165 | 2.693617 | -0.333137 |
| 19 | H | 0.977535  | 2.412066 | 1.020374  |

**6b-TS (Frequency: 325.1692 i cm<sup>-1</sup>)**

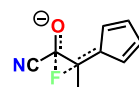

|    |   |           |           |           |
|----|---|-----------|-----------|-----------|
| 1  | C | 1.311125  | -0.653421 | -0.216183 |
| 2  | O | 1.107963  | -1.836122 | -0.310352 |
| 3  | C | 0.290041  | 0.438281  | -0.100080 |
| 4  | F | 1.146087  | 0.301865  | 1.596540  |
| 5  | C | 2.742017  | -0.205793 | -0.273439 |
| 6  | N | 3.866883  | 0.033957  | -0.359184 |
| 7  | C | -2.132180 | 1.112256  | -0.156512 |
| 8  | C | -1.712986 | -1.167650 | 0.026433  |
| 9  | C | -3.333292 | 0.450270  | -0.111871 |
| 10 | H | -1.994538 | 2.188901  | -0.248407 |
| 11 | C | -3.071238 | -0.967761 | 0.006758  |
| 12 | H | -1.196290 | -2.119013 | 0.110666  |
| 13 | H | -4.320977 | 0.909419  | -0.159436 |
| 14 | H | -3.832458 | -1.746009 | 0.069396  |
| 15 | C | -1.066121 | 0.128940  | -0.081838 |
| 16 | C | 0.735995  | 1.844394  | -0.388345 |
| 17 | H | 0.501003  | 2.114384  | -1.428364 |
| 18 | H | 0.206059  | 2.536395  | 0.276087  |
| 19 | H | 1.810379  | 1.973322  | -0.221231 |

**6b-IM2**

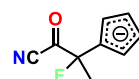

|    |   |           |           |           |
|----|---|-----------|-----------|-----------|
| 1  | C | 1.380678  | 0.090793  | -0.618104 |
| 2  | O | 1.705624  | 0.572199  | -1.672744 |
| 3  | C | 0.551752  | 0.763616  | 0.460478  |
| 4  | F | 1.045696  | 0.294499  | 1.679335  |
| 5  | C | 1.748427  | -1.328412 | -0.314765 |
| 6  | N | 2.129975  | -2.398595 | -0.113762 |
| 7  | C | -1.849704 | 0.858162  | -0.535007 |
| 8  | C | -1.276950 | -1.061118 | 0.600056  |
| 9  | C | -2.935562 | -0.027925 | -0.586498 |
| 10 | H | -1.803002 | 1.852284  | -0.981542 |
| 11 | C | -2.584058 | -1.209839 | 0.117391  |
| 12 | H | -0.712836 | -1.779568 | 1.195713  |
| 13 | H | -3.891282 | 0.164318  | -1.076912 |
| 14 | H | -3.225035 | -2.079973 | 0.267757  |
| 15 | C | -0.819687 | 0.230876  | 0.213678  |
| 16 | C | 0.697057  | 2.266824  | 0.408671  |
| 17 | H | 0.430712  | 2.633006  | -0.589723 |

|    |   |          |          |          |
|----|---|----------|----------|----------|
| 18 | H | 0.027926 | 2.721401 | 1.149619 |
| 19 | H | 1.735726 | 2.552749 | 0.623955 |

**6c-IM1**

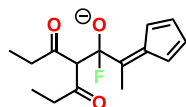

|    |   |           |           |           |
|----|---|-----------|-----------|-----------|
| 1  | C | 0.117664  | -0.966981 | -0.293097 |
| 2  | O | 0.165491  | -0.554693 | -1.486628 |
| 3  | C | -1.258246 | -1.025856 | 0.430365  |
| 4  | F | 0.547621  | -2.393237 | -0.186734 |
| 5  | C | 1.156464  | -0.291270 | 0.720935  |
| 6  | H | 1.138687  | -0.819947 | 1.679791  |
| 7  | C | 0.799379  | 1.155217  | 1.027126  |
| 8  | O | 0.834377  | 1.540487  | 2.178458  |
| 9  | C | 2.568758  | -0.509108 | 0.198323  |
| 10 | O | 3.272674  | -1.351828 | 0.711918  |
| 11 | C | 0.343264  | 2.078741  | -0.081018 |
| 12 | H | 0.952500  | 1.911665  | -0.977474 |
| 13 | H | -0.656257 | 1.713299  | -0.373298 |
| 14 | C | 0.302392  | 3.535963  | 0.347001  |
| 15 | H | 1.303738  | 3.891681  | 0.630116  |
| 16 | H | -0.070319 | 4.170567  | -0.467740 |
| 17 | H | -0.352038 | 3.667090  | 1.218471  |
| 18 | C | 3.047796  | 0.311583  | -0.972990 |
| 19 | H | 2.243301  | 0.242083  | -1.723316 |
| 20 | H | 3.072661  | 1.366866  | -0.649034 |
| 21 | C | 4.401707  | -0.130224 | -1.500694 |
| 22 | H | 4.364670  | -1.174688 | -1.840147 |
| 23 | H | 4.714544  | 0.496397  | -2.346256 |
| 24 | H | 5.169049  | -0.065987 | -0.717328 |
| 25 | C | -3.725679 | -0.497241 | 0.516769  |
| 26 | C | -2.568987 | 0.147101  | -1.426973 |
| 27 | C | -4.591592 | 0.116028  | -0.327313 |
| 28 | H | -3.964156 | -0.899321 | 1.499119  |
| 29 | C | -3.869349 | 0.516764  | -1.540348 |
| 30 | H | -1.758624 | 0.279403  | -2.134985 |
| 31 | H | -5.651642 | 0.291411  | -0.144555 |
| 32 | H | -4.320169 | 1.028906  | -2.390451 |
| 33 | C | -2.392909 | -0.516631 | -0.118829 |
| 34 | C | -1.259184 | -1.636080 | 1.804130  |
| 35 | H | -0.898217 | -0.903127 | 2.544769  |
| 36 | H | -2.255211 | -1.967252 | 2.117231  |
| 37 | H | -0.570299 | -2.489679 | 1.825374  |

**6c-TS (Frequency: 262.9840 i cm<sup>-1</sup>)**

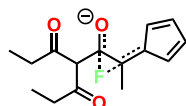

|    |   |           |           |           |
|----|---|-----------|-----------|-----------|
| 1  | C | -0.088685 | -0.518981 | 0.109141  |
| 2  | O | -0.035755 | -1.261968 | -0.850111 |
| 3  | C | -1.380173 | 0.059977  | 0.634181  |
| 4  | F | -0.789794 | -1.377010 | 1.853098  |
| 5  | C | 1.220329  | -0.031608 | 0.748723  |
| 6  | H | 1.120065  | -0.087617 | 1.835492  |
| 7  | C | 1.579459  | 1.403426  | 0.357190  |
| 8  | O | 2.315411  | 2.050884  | 1.064161  |
| 9  | C | 2.345624  | -1.011367 | 0.389321  |
| 10 | O | 2.635626  | -1.892831 | 1.160174  |
| 11 | C | 1.007931  | 1.951312  | -0.930035 |
| 12 | H | 1.183750  | 1.205474  | -1.722567 |
| 13 | H | -0.090827 | 1.972722  | -0.812751 |
| 14 | C | 1.555605  | 3.319119  | -1.294355 |
| 15 | H | 2.644528  | 3.275832  | -1.435115 |
| 16 | H | 1.099502  | 3.686148  | -2.222257 |
| 17 | H | 1.352303  | 4.042653  | -0.493988 |
| 18 | C | 3.041598  | -0.840203 | -0.939230 |
| 19 | H | 2.249590  | -0.881354 | -1.704375 |
| 20 | H | 3.453027  | 0.183810  | -0.977294 |
| 21 | C | 4.120740  | -1.879773 | -1.186622 |
| 22 | H | 3.694319  | -2.891580 | -1.164787 |
| 23 | H | 4.594806  | -1.722653 | -2.163793 |
| 24 | H | 4.896480  | -1.829458 | -0.410698 |
| 25 | C | -3.844850 | 0.462977  | 0.348648  |
| 26 | C | -2.882124 | -1.034149 | -1.150787 |
| 27 | C | -4.817613 | 0.016424  | -0.505804 |
| 28 | H | -3.982556 | 1.176900  | 1.159493  |
| 29 | C | -4.217283 | -0.918156 | -1.437382 |
| 30 | H | -2.156535 | -1.658863 | -1.660727 |
| 31 | H | -5.867103 | 0.311552  | -0.494506 |
| 32 | H | -4.747806 | -1.440928 | -2.233848 |
| 33 | C | -2.583421 | -0.165567 | -0.019354 |
| 34 | C | -1.330766 | 1.130576  | 1.694279  |
| 35 | H | -0.362858 | 1.194876  | 2.197824  |
| 36 | H | -1.569870 | 2.115029  | 1.264306  |
| 37 | H | -2.083144 | 0.907828  | 2.460421  |

**6c-IM2**

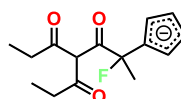

|   |   |           |           |           |
|---|---|-----------|-----------|-----------|
| 1 | C | 0.389421  | 0.851751  | -0.475075 |
| 2 | O | 0.725317  | 0.853304  | -1.638605 |
| 3 | C | -0.625914 | 1.844177  | 0.086215  |
| 4 | F | -0.183578 | 2.197389  | 1.366539  |
| 5 | C | 0.916191  | -0.218022 | 0.486361  |
| 6 | H | 0.868765  | 0.156681  | 1.517183  |
| 7 | C | 2.375838  | -0.468615 | 0.107863  |

|    |   |           |           |           |
|----|---|-----------|-----------|-----------|
| 8  | O | 2.715171  | -1.464749 | -0.483415 |
| 9  | C | 0.160050  | -1.556062 | 0.447548  |
| 10 | O | 0.203172  | -2.271362 | 1.420121  |
| 11 | C | 3.348053  | 0.612335  | 0.517900  |
| 12 | H | 2.890054  | 1.589767  | 0.293138  |
| 13 | H | 3.404674  | 0.568237  | 1.619517  |
| 14 | C | 4.719665  | 0.459870  | -0.115545 |
| 15 | H | 4.651028  | 0.525125  | -1.210162 |
| 16 | H | 5.400935  | 1.244598  | 0.236860  |
| 17 | H | 5.152896  | -0.517507 | 0.134079  |
| 18 | C | -0.521265 | -1.942514 | -0.835202 |
| 19 | H | -1.341539 | -1.216103 | -0.988154 |
| 20 | H | 0.201368  | -1.766701 | -1.648706 |
| 21 | C | -1.042728 | -3.368174 | -0.817777 |
| 22 | H | -1.760223 | -3.500595 | 0.003396  |
| 23 | H | -1.548505 | -3.610340 | -1.761748 |
| 24 | H | -0.225753 | -4.088115 | -0.666708 |
| 25 | C | -2.828235 | 0.847054  | -0.861376 |
| 26 | C | -2.212948 | 0.166152  | 1.242847  |
| 27 | C | -3.733557 | -0.142668 | -0.435056 |
| 28 | H | -2.833463 | 1.354442  | -1.827461 |
| 29 | C | -3.357727 | -0.557596 | 0.865567  |
| 30 | H | -1.669104 | 0.082025  | 2.184521  |
| 31 | H | -4.589242 | -0.511218 | -1.003577 |
| 32 | H | -3.878219 | -1.295850 | 1.478167  |
| 33 | C | -1.888986 | 1.048546  | 0.180519  |
| 34 | C | -0.705137 | 3.098932  | -0.754240 |
| 35 | H | 0.269248  | 3.607365  | -0.772088 |
| 36 | H | -0.983005 | 2.842348  | -1.782933 |
| 37 | H | -1.463315 | 3.770789  | -0.332267 |

**6d-IM1**

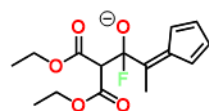

|    |   |           |           |           |
|----|---|-----------|-----------|-----------|
| 1  | C | -0.046496 | -1.479111 | 0.589590  |
| 2  | O | -0.408931 | -0.886220 | 1.635957  |
| 3  | C | 1.443782  | -1.464370 | 0.167565  |
| 4  | F | -0.355246 | -2.924814 | 0.637732  |
| 5  | C | -0.899482 | -1.072797 | -0.760119 |
| 6  | H | -0.904199 | -1.933576 | -1.434656 |
| 7  | C | -0.206799 | 0.053009  | -1.474502 |
| 8  | O | 0.361175  | -0.097307 | -2.533395 |
| 9  | C | -2.304903 | -0.879986 | -0.268295 |
| 10 | O | -3.081280 | -1.794218 | -0.129784 |
| 11 | C | 0.687840  | 2.215287  | -1.311970 |
| 12 | H | 0.451203  | 2.383542  | -2.372202 |
| 13 | H | 1.726884  | 1.851581  | -1.248541 |
| 14 | C | -3.888519 | 0.589613  | 0.642213  |

|    |   |           |           |           |
|----|---|-----------|-----------|-----------|
| 15 | H | -3.946518 | -0.017822 | 1.557634  |
| 16 | H | -4.677186 | 0.235452  | -0.037933 |
| 17 | C | 3.669009  | -0.258167 | 0.109673  |
| 18 | C | 1.960732  | 0.694367  | 1.416570  |
| 19 | C | 4.130094  | 0.887111  | 0.672439  |
| 20 | H | 4.228802  | -0.919485 | -0.548167 |
| 21 | C | 3.064290  | 1.480085  | 1.488813  |
| 22 | H | 0.989203  | 0.835871  | 1.877127  |
| 23 | H | 5.127286  | 1.308396  | 0.544791  |
| 24 | H | 3.157070  | 2.409500  | 2.051150  |
| 25 | C | 2.270193  | -0.451190 | 0.539191  |
| 26 | C | 1.876946  | -2.553390 | -0.765267 |
| 27 | H | 1.694202  | -3.529878 | -0.297824 |
| 28 | H | 1.263809  | -2.521215 | -1.679924 |
| 29 | H | 2.929912  | -2.473993 | -1.054953 |
| 30 | C | 0.477554  | 3.458376  | -0.481020 |
| 31 | H | 0.726517  | 3.260343  | 0.570093  |
| 32 | H | 1.123964  | 4.267047  | -0.847599 |
| 33 | H | -0.567659 | 3.792245  | -0.542431 |
| 34 | C | -4.013980 | 2.065826  | 0.936196  |
| 35 | H | -3.950634 | 2.651655  | 0.008973  |
| 36 | H | -4.979444 | 2.274191  | 1.415494  |
| 37 | H | -3.210306 | 2.391530  | 1.610481  |
| 38 | O | -0.169737 | 1.194671  | -0.797079 |
| 39 | O | -2.614634 | 0.376820  | 0.034607  |

**6d-TS (Frequency: 238.9347 i cm<sup>-1</sup>)**

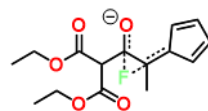

|    |   |           |           |           |
|----|---|-----------|-----------|-----------|
| 1  | C | 0.259813  | -0.842039 | -0.234676 |
| 2  | O | 0.091832  | -1.515120 | 0.757357  |
| 3  | C | 1.594718  | -0.287473 | -0.660470 |
| 4  | F | 1.190193  | -1.851899 | -1.828421 |
| 5  | C | -0.970767 | -0.446521 | -1.074173 |
| 6  | H | -0.804004 | -0.784295 | -2.101140 |
| 7  | C | -1.231589 | 1.048401  | -1.057999 |
| 8  | O | -1.911207 | 1.627824  | -1.863149 |
| 9  | C | -2.167318 | -1.197668 | -0.523253 |
| 10 | O | -2.519848 | -2.282237 | -0.899379 |
| 11 | C | -0.746099 | 3.064124  | 0.066887  |
| 12 | H | -1.805920 | 3.305485  | 0.233725  |
| 13 | H | -0.446246 | 3.514558  | -0.890651 |
| 14 | C | -3.873221 | -1.151222 | 1.098524  |
| 15 | H | -3.519647 | -2.095280 | 1.537715  |
| 16 | H | -4.631427 | -1.398193 | 0.341746  |
| 17 | C | 3.993677  | 0.223781  | -0.108680 |
| 18 | C | 2.870786  | -1.141547 | 1.405659  |
| 19 | C | 4.852214  | -0.095977 | 0.909196  |

|    |   |           |           |           |
|----|---|-----------|-----------|-----------|
| 20 | H | 4.222921  | 0.854680  | -0.966260 |
| 21 | C | 4.152860  | -0.949585 | 1.849659  |
| 22 | H | 2.095808  | -1.733353 | 1.881401  |
| 23 | H | 5.886993  | 0.234005  | 1.004037  |
| 24 | H | 4.583148  | -1.366898 | 2.760587  |
| 25 | C | 2.708061  | -0.408022 | 0.157090  |
| 26 | C | 1.654642  | 0.661047  | -1.828637 |
| 27 | H | 0.788616  | 0.572635  | -2.490702 |
| 28 | H | 1.731529  | 1.701581  | -1.479191 |
| 29 | H | 2.542529  | 0.435014  | -2.430382 |
| 30 | C | 0.130541  | 3.515713  | 1.209712  |
| 31 | H | 1.179531  | 3.250268  | 1.018750  |
| 32 | H | 0.060662  | 4.604900  | 1.325671  |
| 33 | H | -0.185282 | 3.042372  | 2.148968  |
| 34 | C | -4.400655 | -0.199669 | 2.144767  |
| 35 | H | -4.741057 | 0.735655  | 1.680357  |
| 36 | H | -5.248787 | -0.656996 | 2.670441  |
| 37 | H | -3.619751 | 0.036320  | 2.880040  |
| 38 | O | -0.615125 | 1.640840  | -0.041139 |
| 39 | O | -2.766569 | -0.514486 | 0.447440  |

#### 6d-IM2

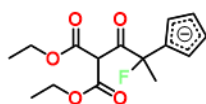

|    |   |           |           |           |
|----|---|-----------|-----------|-----------|
| 1  | C | 0.470052  | -0.091382 | 0.585988  |
| 2  | O | 0.182594  | -0.494872 | 1.682273  |
| 3  | C | 1.653156  | 0.833742  | 0.316154  |
| 4  | F | 1.317103  | 1.517540  | -0.891429 |
| 5  | C | -0.329794 | -0.494783 | -0.658853 |
| 6  | H | 0.365296  | -0.768073 | -1.462429 |
| 7  | C | -1.161924 | 0.678514  | -1.154412 |
| 8  | O | -1.508850 | 0.823141  | -2.294607 |
| 9  | C | -1.181761 | -1.700374 | -0.316140 |
| 10 | O | -0.775845 | -2.831070 | -0.347431 |
| 11 | C | -2.262628 | 2.653812  | -0.510360 |
| 12 | H | -3.183655 | 2.308010  | -1.000893 |
| 13 | H | -1.699081 | 3.253904  | -1.239588 |
| 14 | C | -3.285412 | -2.411079 | 0.466356  |
| 15 | H | -2.821401 | -2.936948 | 1.312930  |
| 16 | H | -3.380066 | -3.126888 | -0.362422 |
| 17 | C | 4.213044  | 0.422787  | 0.320069  |
| 18 | C | 2.905945  | -1.355251 | -0.308189 |
| 19 | C | 5.057625  | -0.653525 | -0.001534 |
| 20 | H | 4.531297  | 1.412561  | 0.651283  |
| 21 | C | 4.251502  | -1.752862 | -0.383377 |
| 22 | H | 2.040133  | -1.989753 | -0.512354 |
| 23 | H | 6.148399  | -0.642665 | 0.040842  |
| 24 | H | 4.609511  | -2.741057 | -0.677461 |

|    |   |           |           |           |
|----|---|-----------|-----------|-----------|
| 25 | C | 2.873504  | -0.001544 | 0.127937  |
| 26 | C | 1.751806  | 1.899502  | 1.390908  |
| 27 | H | 0.831283  | 2.499789  | 1.406700  |
| 28 | H | 1.888989  | 1.425654  | 2.369922  |
| 29 | H | 2.606184  | 2.555589  | 1.183122  |
| 30 | C | -2.549163 | 3.418257  | 0.758943  |
| 31 | H | -1.616815 | 3.759754  | 1.228305  |
| 32 | H | -3.165355 | 4.297460  | 0.530678  |
| 33 | H | -3.093076 | 2.786636  | 1.474093  |
| 34 | C | -4.608837 | -1.788213 | 0.837559  |
| 35 | H | -5.045570 | -1.265494 | -0.023955 |
| 36 | H | -5.308152 | -2.568958 | 1.163243  |
| 37 | H | -4.480140 | -1.069612 | 1.658032  |
| 38 | O | -1.475014 | 1.506771  | -0.164790 |
| 39 | O | -2.405935 | -1.353143 | 0.056620  |

#### 7a-IM1

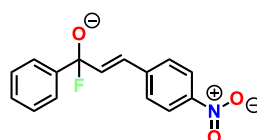

|    |   |           |           |           |
|----|---|-----------|-----------|-----------|
| 1  | C | 5.175487  | 1.870450  | -0.915084 |
| 2  | C | 4.847769  | 0.772103  | -1.712012 |
| 3  | C | 3.971162  | -0.202466 | -1.231622 |
| 4  | C | 3.410946  | -0.092291 | 0.041781  |
| 5  | C | 3.748659  | 1.008007  | 0.838169  |
| 6  | C | 4.625127  | 1.984567  | 0.364043  |
| 7  | H | 5.861061  | 2.634144  | -1.286913 |
| 8  | H | 5.280534  | 0.675007  | -2.709944 |
| 9  | H | 3.706716  | -1.080574 | -1.823249 |
| 10 | H | 3.329565  | 1.083043  | 1.843475  |
| 11 | H | 4.886082  | 2.836338  | 0.995522  |
| 12 | C | 2.422399  | -1.188010 | 0.507060  |
| 13 | O | 2.493835  | -2.299437 | -0.103483 |
| 14 | C | 1.024219  | -0.552642 | 0.617206  |
| 15 | C | -0.020190 | -1.097192 | -0.015413 |
| 16 | H | 0.193314  | -2.005395 | -0.588499 |
| 17 | C | -1.407370 | -0.614438 | -0.019926 |
| 18 | C | -2.366952 | -1.313836 | -0.774217 |
| 19 | C | -1.823755 | 0.522971  | 0.699604  |
| 20 | C | -3.693607 | -0.903615 | -0.818648 |
| 21 | H | -2.058586 | -2.196851 | -1.336134 |
| 22 | C | -3.143372 | 0.947929  | 0.667502  |
| 23 | H | -1.102967 | 1.083318  | 1.295361  |
| 24 | C | -4.061297 | 0.225689  | -0.094055 |
| 25 | H | -4.439520 | -1.441103 | -1.401471 |
| 26 | H | -3.472443 | 1.825468  | 1.221158  |
| 27 | H | 0.929858  | 0.358986  | 1.217470  |
| 28 | F | 2.763171  | -1.305021 | 1.970666  |

|    |   |           |          |           |
|----|---|-----------|----------|-----------|
| 29 | N | -5.458183 | 0.670072 | -0.131635 |
| 30 | O | -6.240540 | 0.027477 | -0.795116 |
| 31 | O | -5.757072 | 1.656828 | 0.502641  |

**7a-TS (Frequency: 272.1695 i cm<sup>-1</sup>)**

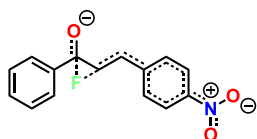

|    |   |           |           |           |
|----|---|-----------|-----------|-----------|
| 1  | C | 5.732604  | 1.412376  | -0.728046 |
| 2  | C | 5.730371  | 0.051263  | -1.039276 |
| 3  | C | 4.630970  | -0.735705 | -0.701337 |
| 4  | C | 3.523383  | -0.164675 | -0.064474 |
| 5  | C | 3.532878  | 1.198334  | 0.257331  |
| 6  | C | 4.637503  | 1.981407  | -0.073929 |
| 7  | H | 6.593163  | 2.030247  | -0.990408 |
| 8  | H | 6.587265  | -0.395823 | -1.545740 |
| 9  | H | 4.612371  | -1.802339 | -0.931125 |
| 10 | H | 2.686179  | 1.591416  | 0.819858  |
| 11 | H | 4.649812  | 3.041009  | 0.186993  |
| 12 | C | 2.350700  | -1.054293 | 0.242168  |
| 13 | O | 2.519541  | -2.245929 | 0.410163  |
| 14 | C | 0.986208  | -0.443370 | 0.241871  |
| 15 | C | -0.112109 | -1.258478 | 0.196027  |
| 16 | H | 0.038153  | -2.336730 | 0.284230  |
| 17 | C | -1.460412 | -0.763023 | 0.089864  |
| 18 | C | -2.530489 | -1.635589 | -0.231829 |
| 19 | C | -1.777025 | 0.601654  | 0.318267  |
| 20 | C | -3.828477 | -1.175397 | -0.362160 |
| 21 | H | -2.317585 | -2.694276 | -0.390584 |
| 22 | C | -3.069450 | 1.075572  | 0.183240  |
| 23 | H | -0.986726 | 1.276899  | 0.647512  |
| 24 | C | -4.088817 | 0.183683  | -0.163128 |
| 25 | H | -4.646557 | -1.846630 | -0.618661 |
| 26 | H | -3.310564 | 2.122528  | 0.360796  |
| 27 | H | 0.911002  | 0.587754  | -0.103727 |
| 28 | F | 1.490535  | 0.233900  | 1.973673  |
| 29 | N | -5.448220 | 0.675020  | -0.298832 |
| 30 | O | -6.320332 | -0.117757 | -0.592883 |
| 31 | O | -5.654311 | 1.857830  | -0.114521 |

**7a-IM2**

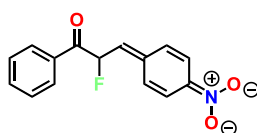

|   |   |           |           |           |
|---|---|-----------|-----------|-----------|
| 1 | C | -6.006078 | -1.237712 | -0.154780 |
| 2 | C | -6.013106 | 0.157787  | -0.219538 |
| 3 | C | -4.810511 | 0.857009  | -0.207535 |
| 4 | C | -3.590945 | 0.171880  | -0.121925 |

|    |   |           |           |           |
|----|---|-----------|-----------|-----------|
| 5  | C | -3.590293 | -1.228023 | -0.053595 |
| 6  | C | -4.795906 | -1.927523 | -0.074652 |
| 7  | H | -6.947562 | -1.789210 | -0.166850 |
| 8  | H | -6.958623 | 0.698200  | -0.282040 |
| 9  | H | -4.792609 | 1.945894  | -0.266825 |
| 10 | H | -2.651590 | -1.774869 | 0.026832  |
| 11 | H | -4.789999 | -3.017102 | -0.024861 |
| 12 | C | -2.331262 | 0.987773  | -0.152229 |
| 13 | O | -2.370210 | 2.173488  | -0.387293 |
| 14 | C | -1.001208 | 0.268272  | 0.104490  |
| 15 | C | 0.154194  | 1.176314  | 0.199895  |
| 16 | H | -0.047317 | 2.239541  | 0.331600  |
| 17 | C | 1.452261  | 0.724761  | 0.129099  |
| 18 | C | 2.579696  | 1.639932  | 0.184201  |
| 19 | C | 1.801088  | -0.681274 | 0.003347  |
| 20 | C | 3.872699  | 1.214692  | 0.082294  |
| 21 | H | 2.369087  | 2.705421  | 0.301293  |
| 22 | C | 3.098137  | -1.100083 | -0.104528 |
| 23 | H | 1.004535  | -1.426871 | 0.022352  |
| 24 | C | 4.165215  | -0.166971 | -0.074516 |
| 25 | H | 4.701383  | 1.921341  | 0.117622  |
| 26 | H | 3.337528  | -2.158812 | -0.200696 |
| 27 | H | -0.868258 | -0.488981 | -0.690763 |
| 28 | F | -1.198016 | -0.495921 | 1.284337  |
| 29 | N | 5.491999  | -0.604483 | -0.179351 |
| 30 | O | 6.405918  | 0.223520  | -0.145807 |
| 31 | O | 5.724004  | -1.809618 | -0.305825 |

**7b-IM1**

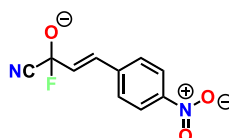

|    |   |           |           |           |
|----|---|-----------|-----------|-----------|
| 1  | C | -3.652282 | 0.233528  | 0.246814  |
| 2  | O | -3.889966 | 1.462482  | 0.139491  |
| 3  | C | -2.194609 | -0.234497 | 0.268799  |
| 4  | C | -1.214663 | 0.643560  | 0.040663  |
| 5  | H | -2.015759 | -1.294928 | 0.472175  |
| 6  | H | -1.530322 | 1.674087  | -0.151166 |
| 7  | C | 0.231111  | 0.375674  | 0.026701  |
| 8  | C | 1.113002  | 1.442359  | -0.216808 |
| 9  | C | 0.769720  | -0.906409 | 0.244443  |
| 10 | C | 2.489179  | 1.249334  | -0.244861 |
| 11 | H | 0.706547  | 2.440446  | -0.386996 |
| 12 | C | 2.140296  | -1.118564 | 0.219364  |
| 13 | H | 0.107799  | -1.751354 | 0.434946  |
| 14 | C | 2.979774  | -0.033255 | -0.025790 |
| 15 | H | 3.178627  | 2.070400  | -0.432673 |
| 16 | H | 2.567236  | -2.105945 | 0.385385  |

|    |   |           |           |           |
|----|---|-----------|-----------|-----------|
| 17 | N | 4.431704  | -0.252235 | -0.054363 |
| 18 | O | 5.143992  | 0.701956  | -0.268389 |
| 19 | O | 4.838544  | -1.375366 | 0.137554  |
| 20 | F | -4.195017 | -0.379408 | 1.469687  |
| 21 | C | -4.386518 | -0.633055 | -0.821538 |
| 22 | N | -4.953074 | -1.182431 | -1.666325 |

**7b-TS (Frequency: 344.2083 i cm<sup>-1</sup>)**

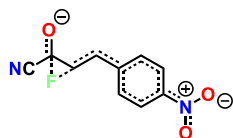

|    |   |           |           |           |
|----|---|-----------|-----------|-----------|
| 1  | C | 3.637861  | -0.446758 | -0.202435 |
| 2  | O | 4.015210  | -1.579192 | -0.057881 |
| 3  | C | 2.237636  | 0.041192  | -0.087536 |
| 4  | C | 1.234250  | -0.886344 | 0.097503  |
| 5  | H | 2.021783  | 0.986804  | -0.590257 |
| 6  | H | 1.516508  | -1.919480 | 0.308041  |
| 7  | C | -0.160181 | -0.554253 | 0.067789  |
| 8  | C | -1.143014 | -1.580057 | 0.039795  |
| 9  | C | -0.626823 | 0.789025  | 0.070688  |
| 10 | C | -2.493258 | -1.293455 | -0.020195 |
| 11 | H | -0.815835 | -2.621235 | 0.055214  |
| 12 | C | -1.974807 | 1.086851  | 0.001929  |
| 13 | H | 0.091632  | 1.604132  | 0.164512  |
| 14 | C | -2.905184 | 0.043470  | -0.048230 |
| 15 | H | -3.240570 | -2.084891 | -0.050162 |
| 16 | H | -2.326380 | 2.117515  | 0.005192  |
| 17 | N | -4.318811 | 0.351774  | -0.110867 |
| 18 | O | -5.109995 | -0.570757 | -0.141865 |
| 19 | O | -4.655117 | 1.519814  | -0.131719 |
| 20 | F | 2.892948  | 0.874825  | 1.367345  |
| 21 | C | 4.648285  | 0.615460  | -0.494359 |
| 22 | N | 5.459803  | 1.390230  | -0.760078 |

**7b-IM2**

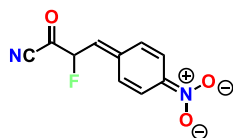

|    |   |           |           |           |
|----|---|-----------|-----------|-----------|
| 1  | C | -3.616136 | 0.417818  | -0.432211 |
| 2  | O | -3.767732 | 1.461537  | -0.996140 |
| 3  | C | -2.280243 | -0.219201 | -0.094854 |
| 4  | C | -1.250151 | 0.772811  | 0.242864  |
| 5  | H | -1.999660 | -0.830934 | -0.974099 |
| 6  | H | -1.579227 | 1.762512  | 0.563524  |
| 7  | C | 0.100047  | 0.489792  | 0.171631  |
| 8  | C | 1.095910  | 1.501251  | 0.464574  |
| 9  | C | 0.624965  | -0.812797 | -0.188261 |
| 10 | C | 2.437250  | 1.256076  | 0.369485  |

|    |   |           |           |           |
|----|---|-----------|-----------|-----------|
| 11 | H | 0.748884  | 2.493535  | 0.760804  |
| 12 | C | 1.969866  | -1.051316 | -0.287766 |
| 13 | H | -0.068201 | -1.638247 | -0.359264 |
| 14 | C | 2.904586  | -0.024840 | -0.017896 |
| 15 | H | 3.167183  | 2.035406  | 0.586182  |
| 16 | H | 2.342609  | -2.037951 | -0.561335 |
| 17 | N | 4.286129  | -0.278644 | -0.113934 |
| 18 | O | 5.080797  | 0.627941  | 0.132139  |
| 19 | O | 4.669846  | -1.400170 | -0.444076 |
| 20 | F | -2.558443 | -1.159680 | 0.920765  |
| 21 | C | -4.817994 | -0.376817 | -0.028084 |
| 22 | N | -5.780055 | -0.946830 | 0.251794  |

**7c-IM1**

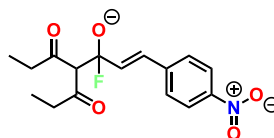

|    |   |           |           |           |
|----|---|-----------|-----------|-----------|
| 1  | C | 2.048359  | -0.295482 | 1.607268  |
| 2  | O | 2.191445  | -1.506716 | 1.949096  |
| 3  | C | 0.648577  | 0.157066  | 1.183360  |
| 4  | C | -0.347395 | -0.722341 | 1.041274  |
| 5  | H | 0.496436  | 1.231945  | 1.036038  |
| 6  | H | -0.099624 | -1.768615 | 1.249103  |
| 7  | C | -1.731882 | -0.429012 | 0.644646  |
| 8  | C | -2.672369 | -1.473889 | 0.639133  |
| 9  | C | -2.156570 | 0.857706  | 0.260973  |
| 10 | C | -3.995005 | -1.253956 | 0.273805  |
| 11 | H | -2.354631 | -2.476280 | 0.930183  |
| 12 | C | -3.472155 | 1.096209  | -0.107782 |
| 13 | H | -1.446033 | 1.684589  | 0.245788  |
| 14 | C | -4.373519 | 0.032944  | -0.093920 |
| 15 | H | -4.728828 | -2.057922 | 0.269599  |
| 16 | H | -3.809226 | 2.087192  | -0.406417 |
| 17 | N | -5.767093 | 0.279367  | -0.482778 |
| 18 | O | -6.533937 | -0.656555 | -0.466428 |
| 19 | O | -6.076248 | 1.405756  | -0.799128 |
| 20 | F | 2.310946  | 0.658183  | 2.715187  |
| 21 | C | 3.169733  | 0.191596  | 0.569442  |
| 22 | H | 4.074609  | 0.226661  | 1.188762  |
| 23 | C | 2.975779  | 1.600317  | 0.044713  |
| 24 | O | 3.502439  | 2.537736  | 0.605493  |
| 25 | C | 3.435147  | -0.866940 | -0.492089 |
| 26 | O | 4.579937  | -1.169520 | -0.754394 |
| 27 | C | 2.130757  | 1.844684  | -1.193619 |
| 28 | H | 1.265713  | 1.167370  | -1.219749 |
| 29 | H | 1.754522  | 2.874711  | -1.121720 |
| 30 | C | 2.970112  | 1.689102  | -2.467083 |
| 31 | H | 3.355671  | 0.666091  | -2.586615 |

|    |   |          |           |           |
|----|---|----------|-----------|-----------|
| 32 | H | 2.366430 | 1.925666  | -3.353078 |
| 33 | H | 3.830159 | 2.372828  | -2.444182 |
| 34 | C | 2.278242 | -1.563274 | -1.174048 |
| 35 | H | 1.776540 | -2.121039 | -0.367256 |
| 36 | H | 1.542452 | -0.816260 | -1.507511 |
| 37 | C | 2.715806 | -2.472221 | -2.309768 |
| 38 | H | 3.425014 | -3.229097 | -1.949778 |
| 39 | H | 1.852025 | -2.986201 | -2.751546 |
| 40 | H | 3.219115 | -1.901524 | -3.103795 |

**7c-TS (Frequency: 305.4423 i cm<sup>-1</sup>)**

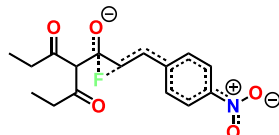

|    |   |           |           |           |
|----|---|-----------|-----------|-----------|
| 1  | C | 1.538487  | 0.615137  | -0.360048 |
| 2  | O | 1.824696  | 1.072769  | -1.442929 |
| 3  | C | 0.137266  | 0.233466  | 0.015916  |
| 4  | C | -0.879942 | 0.475786  | -0.882827 |
| 5  | H | -0.082589 | 0.231463  | 1.085624  |
| 6  | H | -0.613817 | 0.791336  | -1.893523 |
| 7  | C | -2.264875 | 0.297212  | -0.563644 |
| 8  | C | -3.278929 | 0.786391  | -1.431528 |
| 9  | C | -2.691408 | -0.376925 | 0.614634  |
| 10 | C | -4.620558 | 0.657078  | -1.129216 |
| 11 | H | -2.982650 | 1.288488  | -2.354374 |
| 12 | C | -4.030638 | -0.503882 | 0.930658  |
| 13 | H | -1.943755 | -0.837896 | 1.260913  |
| 14 | C | -4.993186 | 0.019749  | 0.060262  |
| 15 | H | -5.391859 | 1.043657  | -1.793676 |
| 16 | H | -4.351825 | -1.020961 | 1.833675  |
| 17 | N | -6.396434 | -0.117598 | 0.385398  |
| 18 | O | -7.216713 | 0.336250  | -0.389311 |
| 19 | O | -6.698048 | -0.679149 | 1.421102  |
| 20 | F | 0.738048  | -1.484740 | 0.114586  |
| 21 | C | 2.600044  | 0.321844  | 0.697538  |
| 22 | H | 2.125664  | 0.223782  | 1.679711  |
| 23 | C | 3.631768  | 1.446557  | 0.840457  |
| 24 | O | 3.689642  | 2.064551  | 1.877118  |
| 25 | C | 3.307388  | -1.027543 | 0.453368  |
| 26 | O | 3.736450  | -1.630450 | 1.406648  |
| 27 | C | 4.598984  | 1.721108  | -0.288959 |
| 28 | H | 4.138249  | 1.465227  | -1.250527 |
| 29 | H | 4.805388  | 2.800505  | -0.275993 |
| 30 | C | 5.907286  | 0.950089  | -0.069613 |
| 31 | H | 5.753603  | -0.138746 | -0.078996 |
| 32 | H | 6.626881  | 1.193622  | -0.861908 |
| 33 | H | 6.351868  | 1.220999  | 0.897837  |
| 34 | C | 3.472401  | -1.520374 | -0.962630 |

|    |   |          |           |           |
|----|---|----------|-----------|-----------|
| 35 | H | 2.444737 | -1.751646 | -1.284160 |
| 36 | H | 3.809642 | -0.687017 | -1.598261 |
| 37 | C | 4.383206 | -2.731754 | -1.061712 |
| 38 | H | 4.006608 | -3.549656 | -0.433617 |
| 39 | H | 4.442897 | -3.087442 | -2.098359 |
| 40 | H | 5.401579 | -2.495265 | -0.720401 |

**7c-IM2**

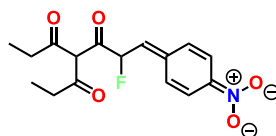

|    |   |           |           |           |
|----|---|-----------|-----------|-----------|
| 1  | C | -1.510527 | 0.074883  | 0.642601  |
| 2  | O | -1.687288 | -0.279600 | 1.783874  |
| 3  | C | -0.275698 | 0.832778  | 0.199248  |
| 4  | C | 0.664532  | -0.105566 | -0.429496 |
| 5  | H | 0.148738  | 1.341015  | 1.075222  |
| 6  | H | 0.241899  | -0.898898 | -1.052887 |
| 7  | C | 2.041691  | -0.068405 | -0.267839 |
| 8  | C | 2.877499  | -1.076483 | -0.885787 |
| 9  | C | 2.749784  | 0.938140  | 0.494360  |
| 10 | C | 4.238694  | -1.086991 | -0.750739 |
| 11 | H | 2.389994  | -1.855018 | -1.476579 |
| 12 | C | 4.113117  | 0.923301  | 0.629105  |
| 13 | H | 2.190697  | 1.745913  | 0.968148  |
| 14 | C | 4.886119  | -0.087731 | 0.014421  |
| 15 | H | 4.843889  | -1.859430 | -1.224114 |
| 16 | H | 4.624219  | 1.693319  | 1.206195  |
| 17 | N | 6.289152  | -0.096685 | 0.155767  |
| 18 | O | 6.939651  | -0.984294 | -0.392262 |
| 19 | O | 6.830405  | 0.782105  | 0.823829  |
| 20 | F | -0.743060 | 1.851905  | -0.677956 |
| 21 | C | -2.500069 | -0.221538 | -0.482781 |
| 22 | H | -1.949144 | -0.334975 | -1.425945 |
| 23 | C | -3.493871 | 0.932089  | -0.713038 |
| 24 | O | -4.063681 | 1.004195  | -1.773055 |
| 25 | C | -3.227427 | -1.549034 | -0.233015 |
| 26 | O | -2.842327 | -2.548232 | -0.787384 |
| 27 | C | -3.729857 | 1.904512  | 0.414180  |
| 28 | H | -3.888489 | 1.326409  | 1.339150  |
| 29 | H | -2.768893 | 2.428155  | 0.560919  |
| 30 | C | -4.863708 | 2.875109  | 0.137977  |
| 31 | H | -5.812302 | 2.336662  | 0.004794  |
| 32 | H | -4.979715 | 3.582146  | 0.968789  |
| 33 | H | -4.671102 | 3.443399  | -0.781323 |
| 34 | C | -4.382645 | -1.541354 | 0.735567  |
| 35 | H | -3.985516 | -1.128362 | 1.677854  |
| 36 | H | -5.122960 | -0.807219 | 0.372080  |
| 37 | C | -5.007464 | -2.911615 | 0.931741  |

|    |   |           |           |           |
|----|---|-----------|-----------|-----------|
| 38 | H | -4.264070 | -3.625266 | 1.311316  |
| 39 | H | -5.837296 | -2.859655 | 1.647693  |
| 40 | H | -5.391585 | -3.304509 | -0.019136 |

**7d-IM1**

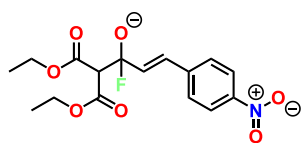

|    |   |           |           |           |
|----|---|-----------|-----------|-----------|
| 1  | C | -1.161510 | -1.391380 | -0.536341 |
| 2  | O | -1.411155 | -2.051143 | 0.510749  |
| 3  | C | 0.262368  | -0.861638 | -0.733319 |
| 4  | C | 1.197612  | -1.069226 | 0.197045  |
| 5  | H | 0.472807  | -0.333581 | -1.669845 |
| 6  | H | 0.865284  | -1.604227 | 1.092299  |
| 7  | C | 2.605661  | -0.654438 | 0.150715  |
| 8  | C | 3.433057  | -0.939234 | 1.251811  |
| 9  | C | 3.167625  | 0.019829  | -0.950875 |
| 10 | C | 4.771887  | -0.567823 | 1.266981  |
| 11 | H | 3.010774  | -1.462106 | 2.111345  |
| 12 | C | 4.501553  | 0.398979  | -0.953966 |
| 13 | H | 2.551224  | 0.250537  | -1.819981 |
| 14 | C | 5.285552  | 0.098387  | 0.159085  |
| 15 | H | 5.416245  | -0.785147 | 2.116994  |
| 16 | H | 4.943271  | 0.920492  | -1.801166 |
| 17 | N | 6.697263  | 0.496657  | 0.160935  |
| 18 | O | 7.361838  | 0.226382  | 1.135692  |
| 19 | O | 7.124394  | 1.075432  | -0.812563 |
| 20 | F | -1.290715 | -2.226105 | -1.785290 |
| 21 | C | -2.204150 | -0.256240 | -0.889239 |
| 22 | H | -2.112529 | 0.027224  | -1.945574 |
| 23 | C | -2.063120 | 0.984420  | -0.034466 |
| 24 | O | -1.368204 | 1.115670  | 0.937640  |
| 25 | C | -3.577900 | -0.853130 | -0.698666 |
| 26 | O | -4.164494 | -1.521301 | -1.509596 |
| 27 | C | -2.861123 | 3.181727  | 0.249492  |
| 28 | H | -1.841637 | 3.592252  | 0.294784  |
| 29 | H | -3.167889 | 2.949142  | 1.280174  |
| 30 | C | -5.348705 | -1.140120 | 0.827173  |
| 31 | H | -5.259361 | -2.235972 | 0.792032  |
| 32 | H | -6.076971 | -0.843083 | 0.058490  |
| 33 | C | -3.822751 | 4.130322  | -0.425599 |
| 34 | H | -4.831910 | 3.697811  | -0.458969 |
| 35 | H | -3.866949 | 5.076549  | 0.129215  |
| 36 | H | -3.498601 | 4.343356  | -1.453213 |
| 37 | C | -5.742044 | -0.649210 | 2.199995  |
| 38 | H | -6.713242 | -1.073630 | 2.485915  |
| 39 | H | -4.994857 | -0.951379 | 2.946114  |
| 40 | H | -5.823601 | 0.446356  | 2.209316  |

|    |   |           |           |           |
|----|---|-----------|-----------|-----------|
| 41 | O | -2.838467 | 1.968452  | -0.506673 |
| 42 | O | -4.078980 | -0.568943 | 0.506522  |

**7d-TS (Frequency: 311.4743 i cm<sup>-1</sup>)**

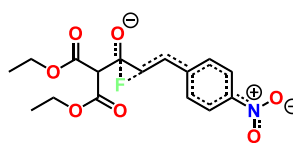

|    |   |           |           |           |
|----|---|-----------|-----------|-----------|
| 1  | C | 1.090214  | -1.089287 | 0.326306  |
| 2  | O | 1.348376  | -2.198723 | -0.076199 |
| 3  | C | -0.299788 | -0.564565 | 0.473435  |
| 4  | C | -1.343509 | -1.275741 | -0.067073 |
| 5  | H | -0.392995 | 0.511650  | 0.624279  |
| 6  | H | -1.136910 | -2.268253 | -0.472856 |
| 7  | C | -2.698183 | -0.800639 | -0.086566 |
| 8  | C | -3.684555 | -1.464631 | -0.862892 |
| 9  | C | -3.117282 | 0.332178  | 0.662861  |
| 10 | C | -4.989024 | -1.012208 | -0.924210 |
| 11 | H | -3.396052 | -2.349299 | -1.433438 |
| 12 | C | -4.417085 | 0.798849  | 0.602282  |
| 13 | H | -2.405816 | 0.820378  | 1.329697  |
| 14 | C | -5.348520 | 0.127489  | -0.196756 |
| 15 | H | -5.738601 | -1.520657 | -1.528672 |
| 16 | H | -4.733702 | 1.666545  | 1.179076  |
| 17 | N | -6.713524 | 0.609226  | -0.257208 |
| 18 | O | -7.511142 | -0.001312 | -0.941832 |
| 19 | O | -7.003588 | 1.604652  | 0.377325  |
| 20 | F | 0.036673  | -0.796489 | 2.296061  |
| 21 | C | 2.206136  | -0.139543 | 0.769056  |
| 22 | H | 1.948885  | 0.170119  | 1.790022  |
| 23 | C | 2.279405  | 1.069618  | -0.142634 |
| 24 | O | 1.561107  | 1.261227  | -1.089211 |
| 25 | C | 3.527548  | -0.880156 | 0.793249  |
| 26 | O | 3.994465  | -1.415292 | 1.761991  |
| 27 | C | 3.467739  | 3.051362  | -0.583416 |
| 28 | H | 2.546097  | 3.650476  | -0.597072 |
| 29 | H | 3.664106  | 2.716045  | -1.611995 |
| 30 | C | 5.330819  | -1.602922 | -0.537048 |
| 31 | H | 5.155872  | -2.656816 | -0.276525 |
| 32 | H | 6.045025  | -1.192782 | 0.191237  |
| 33 | C | 4.633281  | 3.812617  | -0.000969 |
| 34 | H | 5.537137  | 3.188726  | 0.006320  |
| 35 | H | 4.831236  | 4.706952  | -0.605771 |
| 36 | H | 4.414388  | 4.128201  | 1.027836  |
| 37 | C | 5.811307  | -1.440614 | -1.958558 |
| 38 | H | 6.760213  | -1.975536 | -2.093658 |
| 39 | H | 5.075960  | -1.849607 | -2.664190 |
| 40 | H | 5.972109  | -0.379599 | -2.192940 |
| 41 | O | 3.247291  | 1.893944  | 0.236115  |



42 O 4.091821 -0.893693 -0.410419

**7d-IM2**

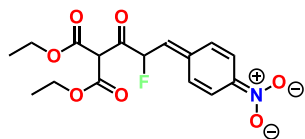

|    |   |           |           |           |
|----|---|-----------|-----------|-----------|
| 1  | C | 1.040844  | -0.984565 | 0.099605  |
| 2  | O | 1.141995  | -2.096367 | -0.346581 |
| 3  | C | -0.276696 | -0.223218 | 0.101572  |
| 4  | C | -1.414737 | -1.054452 | 0.540126  |
| 5  | H | -0.409309 | 0.170143  | -0.922728 |
| 6  | H | -1.199218 | -1.993289 | 1.053077  |
| 7  | C | -2.721911 | -0.676560 | 0.325649  |
| 8  | C | -3.832185 | -1.519222 | 0.731329  |
| 9  | C | -3.091784 | 0.577588  | -0.306788 |
| 10 | C | -5.133194 | -1.173473 | 0.501852  |
| 11 | H | -3.604281 | -2.464868 | 1.228248  |
| 12 | C | -4.397117 | 0.915237  | -0.538577 |
| 13 | H | -2.306612 | 1.284154  | -0.580830 |
| 14 | C | -5.447715 | 0.049807  | -0.146245 |
| 15 | H | -5.950434 | -1.825790 | 0.808003  |
| 16 | H | -4.653326 | 1.860869  | -1.015509 |
| 17 | N | -6.785222 | 0.407014  | -0.377234 |
| 18 | O | -7.683392 | -0.356045 | -0.016605 |
| 19 | O | -7.037110 | 1.475523  | -0.937542 |
| 20 | F | -0.079897 | 0.931290  | 0.897336  |
| 21 | C | 2.238185  | -0.248941 | 0.703296  |
| 22 | H | 2.001425  | 0.026384  | 1.739646  |
| 23 | C | 2.520513  | 1.013528  | -0.095457 |
| 24 | O | 2.039909  | 1.258528  | -1.169912 |
| 25 | C | 3.444609  | -1.170071 | 0.711750  |
| 26 | O | 3.751393  | -1.874294 | 1.633871  |
| 27 | C | 3.799967  | 2.982877  | -0.153161 |
| 28 | H | 2.908437  | 3.595749  | -0.347472 |
| 29 | H | 4.226604  | 2.693775  | -1.124323 |
| 30 | C | 5.236149  | -1.976872 | -0.585238 |
| 31 | H | 4.899906  | -3.016853 | -0.467130 |
| 32 | H | 5.941399  | -1.757356 | 0.228778  |
| 33 | C | 4.802487  | 3.695209  | 0.720834  |
| 34 | H | 5.677656  | 3.057781  | 0.904555  |
| 35 | H | 5.138331  | 4.614474  | 0.223962  |
| 36 | H | 4.352676  | 3.964368  | 1.685750  |
| 37 | C | 5.837396  | -1.722971 | -1.945732 |
| 38 | H | 6.712259  | -2.369737 | -2.090651 |
| 39 | H | 5.107803  | -1.939503 | -2.737314 |
| 40 | H | 6.157809  | -0.676485 | -2.037715 |
| 41 | O | 3.389433  | 1.789200  | 0.533381  |
| 42 | O | 4.095977  | -1.116284 | -0.443193 |

**8a-IM1**

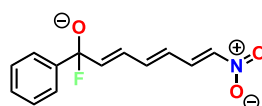

|    |   |           |           |           |
|----|---|-----------|-----------|-----------|
| 1  | C | 4.771545  | 1.577660  | 0.998096  |
| 2  | C | 3.858624  | 0.528678  | 1.112491  |
| 3  | C | 3.359111  | -0.106680 | -0.030054 |
| 4  | C | 3.792770  | 0.320190  | -1.286087 |
| 5  | C | 4.704993  | 1.369903  | -1.406707 |
| 6  | C | 5.195892  | 2.002839  | -0.263398 |
| 7  | H | 5.159777  | 2.063324  | 1.895708  |
| 8  | H | 3.536120  | 0.181015  | 2.095863  |
| 9  | H | 3.401228  | -0.204582 | -2.159166 |
| 10 | H | 5.037986  | 1.694825  | -2.394672 |
| 11 | H | 5.910185  | 2.823284  | -0.353631 |
| 12 | C | 2.324590  | -1.255471 | 0.037096  |
| 13 | O | 2.251995  | -2.004287 | -0.986093 |
| 14 | C | 0.998907  | -0.668715 | 0.546555  |
| 15 | C | -0.144665 | -0.844724 | -0.133349 |
| 16 | H | 1.008354  | -0.084287 | 1.474594  |
| 17 | H | -0.090629 | -1.435640 | -1.053628 |
| 18 | F | 2.765810  | -1.997039 | 1.272824  |
| 19 | C | -1.418865 | -0.305214 | 0.289239  |
| 20 | C | -2.583068 | -0.477610 | -0.381654 |
| 21 | H | -1.429922 | 0.282482  | 1.214827  |
| 22 | H | -2.597195 | -1.059924 | -1.307621 |
| 23 | C | -3.819613 | 0.090727  | 0.089975  |
| 24 | C | -4.998855 | -0.048997 | -0.540119 |
| 25 | H | -3.805041 | 0.673718  | 1.015491  |
| 26 | H | -5.184146 | -0.592568 | -1.463360 |
| 27 | N | -6.191792 | 0.557605  | 0.001892  |
| 28 | O | -6.126113 | 1.195784  | 1.032582  |
| 29 | O | -7.218963 | 0.387623  | -0.624686 |

**8a-TS (Frequency: 226.0900 i cm<sup>-1</sup>)**

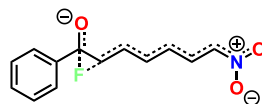

|    |   |          |           |           |
|----|---|----------|-----------|-----------|
| 1  | C | 4.851992 | 1.825753  | 0.131800  |
| 2  | C | 3.680087 | 1.130844  | 0.424258  |
| 3  | C | 3.490023 | -0.161659 | -0.080278 |
| 4  | C | 4.487144 | -0.753117 | -0.862484 |
| 5  | C | 5.656914 | -0.054211 | -1.158765 |
| 6  | C | 5.838305 | 1.238397  | -0.664788 |
| 7  | H | 5.004037 | 2.828256  | 0.535524  |
| 8  | H | 2.919017 | 1.528561  | 1.094660  |
| 9  | H | 4.329500 | -1.766344 | -1.235906 |
| 10 | H | 6.428393 | -0.517601 | -1.775913 |

|    |   |           |           |           |
|----|---|-----------|-----------|-----------|
| 11 | H | 6.753195  | 1.787312  | -0.894662 |
| 12 | C | 2.230335  | -0.948366 | 0.163436  |
| 13 | O | 2.255954  | -2.164749 | 0.154332  |
| 14 | C | 0.942960  | -0.198741 | 0.237797  |
| 15 | C | -0.252130 | -0.852246 | 0.141994  |
| 16 | H | 0.976443  | 0.885309  | 0.124659  |
| 17 | H | -0.251989 | -1.945372 | 0.150580  |
| 18 | F | 1.748274  | -0.016976 | 2.088384  |
| 19 | C | -1.489853 | -0.153534 | 0.072323  |
| 20 | C | -2.729564 | -0.727324 | -0.013523 |
| 21 | H | -1.438765 | 0.942771  | 0.079168  |
| 22 | H | -2.823512 | -1.817214 | -0.018684 |
| 23 | C | -3.911555 | 0.064480  | -0.096256 |
| 24 | C | -5.170277 | -0.428328 | -0.181214 |
| 25 | H | -3.805181 | 1.153645  | -0.090775 |
| 26 | H | -5.452416 | -1.477763 | -0.197922 |
| 27 | N | -6.292124 | 0.454266  | -0.259443 |
| 28 | O | -6.119809 | 1.660856  | -0.253321 |
| 29 | O | -7.395471 | -0.061145 | -0.330498 |

**8a-IM2**

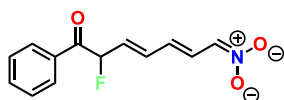

|    |   |           |           |           |
|----|---|-----------|-----------|-----------|
| 1  | C | 5.112647  | 1.600192  | -0.227381 |
| 2  | C | 3.804095  | 1.159008  | -0.037128 |
| 3  | C | 3.499484  | -0.203162 | -0.163243 |
| 4  | C | 4.518013  | -1.113168 | -0.476868 |
| 5  | C | 5.824817  | -0.672126 | -0.657163 |
| 6  | C | 6.122396  | 0.687472  | -0.534291 |
| 7  | H | 5.345228  | 2.661543  | -0.132529 |
| 8  | H | 3.026097  | 1.877689  | 0.219176  |
| 9  | H | 4.260641  | -2.168305 | -0.577498 |
| 10 | H | 6.614240  | -1.385850 | -0.896393 |
| 11 | H | 7.146105  | 1.036652  | -0.678307 |
| 12 | C | 2.107658  | -0.738815 | -0.019576 |
| 13 | O | 1.845078  | -1.884441 | -0.302973 |
| 14 | C | 1.010286  | 0.212574  | 0.481804  |
| 15 | C | -0.281498 | -0.460839 | 0.751630  |
| 16 | H | 0.877402  | 1.015979  | -0.263030 |
| 17 | H | -0.245867 | -1.381568 | 1.341345  |
| 18 | F | 1.521933  | 0.813398  | 1.641159  |
| 19 | C | -1.460857 | 0.024169  | 0.301622  |
| 20 | C | -2.762005 | -0.544963 | 0.520396  |
| 21 | H | -1.438663 | 0.943149  | -0.300401 |
| 22 | H | -2.829302 | -1.461601 | 1.116002  |
| 23 | C | -3.899205 | 0.025765  | 0.011806  |
| 24 | C | -5.217918 | -0.442150 | 0.164155  |
| 25 | H | -3.798631 | 0.942463  | -0.578754 |

|    |   |           |           |           |
|----|---|-----------|-----------|-----------|
| 26 | H | -5.492132 | -1.338291 | 0.714217  |
| 27 | N | -6.277321 | 0.222736  | -0.393002 |
| 28 | O | -6.106075 | 1.268169  | -1.049172 |
| 29 | O | -7.425099 | -0.236896 | -0.232583 |

**8b-IM1**

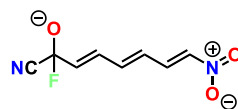

|    |   |           |           |           |
|----|---|-----------|-----------|-----------|
| 1  | C | 3.669116  | -0.339225 | 0.135598  |
| 2  | O | 3.722142  | -1.483919 | -0.378813 |
| 3  | C | 2.295976  | 0.272542  | 0.415697  |
| 4  | C | 1.182115  | -0.343917 | -0.000755 |
| 5  | H | 2.257632  | 1.223576  | 0.958144  |
| 6  | H | 1.302267  | -1.288889 | -0.540411 |
| 7  | F | 4.328435  | -0.235727 | 1.447573  |
| 8  | C | 4.488944  | 0.732138  | -0.647167 |
| 9  | N | 5.104163  | 1.454081  | -1.308000 |
| 10 | C | -0.154744 | 0.167566  | 0.231169  |
| 11 | C | -1.280670 | -0.453076 | -0.187705 |
| 12 | H | -0.242980 | 1.113192  | 0.777965  |
| 13 | H | -1.210787 | -1.397625 | -0.735116 |
| 14 | C | -2.590815 | 0.096730  | 0.066152  |
| 15 | C | -3.732317 | -0.485612 | -0.333339 |
| 16 | H | -2.663660 | 1.040218  | 0.614573  |
| 17 | H | -3.832370 | -1.418093 | -0.883789 |
| 18 | N | -5.008057 | 0.129726  | -0.037210 |
| 19 | O | -5.039992 | 1.179053  | 0.570445  |
| 20 | O | -5.995199 | -0.460178 | -0.426751 |

**8b-TS (Frequency: 379.0603 i cm<sup>-1</sup>)**

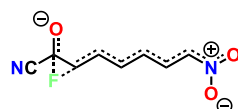

|    |   |           |           |           |
|----|---|-----------|-----------|-----------|
| 1  | C | -3.660607 | 0.437397  | -0.238593 |
| 2  | O | -3.872763 | 1.621927  | -0.210605 |
| 3  | C | -2.332958 | -0.211188 | -0.098665 |
| 4  | C | -1.198580 | 0.563248  | 0.001221  |
| 5  | H | -2.254057 | -1.255256 | -0.407184 |
| 6  | H | -1.308891 | 1.638823  | 0.158735  |
| 7  | F | -3.200265 | -0.640879 | 1.502193  |
| 8  | C | -4.804939 | -0.499456 | -0.446627 |
| 9  | N | -5.714585 | -1.176386 | -0.655502 |
| 10 | C | 0.093229  | -0.009682 | -0.053285 |
| 11 | C | 1.285312  | 0.666827  | 0.048891  |
| 12 | H | 0.145199  | -1.095768 | -0.203926 |
| 13 | H | 1.281689  | 1.749428  | 0.205700  |
| 14 | C | 2.528654  | -0.011181 | -0.046130 |
| 15 | C | 3.751080  | 0.574879  | 0.042719  |

|    |   |          |           |           |
|----|---|----------|-----------|-----------|
| 16 | H | 2.513724 | -1.094244 | -0.203301 |
| 17 | H | 3.947508 | 1.632511  | 0.196898  |
| 18 | N | 4.937694 | -0.204781 | -0.067624 |
| 19 | O | 4.864076 | -1.410688 | -0.243431 |
| 20 | O | 6.002225 | 0.388200  | 0.021291  |

**8b-IM2**

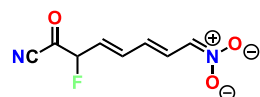

|    |   |           |           |           |
|----|---|-----------|-----------|-----------|
| 1  | C | -3.485626 | 0.644264  | -0.239029 |
| 2  | O | -3.228446 | 1.806425  | -0.348474 |
| 3  | C | -2.451596 | -0.477611 | -0.253451 |
| 4  | C | -1.242748 | -0.155854 | 0.540206  |
| 5  | H | -2.185596 | -0.641184 | -1.312372 |
| 6  | H | -1.395530 | 0.159177  | 1.576816  |
| 7  | F | -3.111902 | -1.615450 | 0.197701  |
| 8  | C | -4.908269 | 0.208920  | -0.100437 |
| 9  | N | -6.021028 | -0.074263 | 0.001036  |
| 10 | C | 0.004353  | -0.237315 | 0.015608  |
| 11 | C | 1.235354  | 0.052197  | 0.686348  |
| 12 | H | 0.094769  | -0.551320 | -1.033240 |
| 13 | H | 1.192783  | 0.371157  | 1.732855  |
| 14 | C | 2.448275  | -0.059769 | 0.051424  |
| 15 | C | 3.712002  | 0.197137  | 0.603551  |
| 16 | H | 2.455999  | -0.380784 | -0.995491 |
| 17 | H | 3.883972  | 0.525112  | 1.625048  |
| 18 | N | 4.857157  | 0.048077  | -0.140483 |
| 19 | O | 4.805941  | -0.323345 | -1.326241 |
| 20 | O | 5.952172  | 0.292967  | 0.396950  |

**8c-IM1**

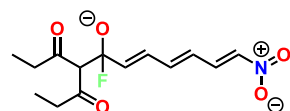

|    |   |           |           |           |
|----|---|-----------|-----------|-----------|
| 1  | C | 1.510690  | -0.859136 | -0.198585 |
| 2  | O | 1.601802  | -0.631429 | -1.439727 |
| 3  | C | 0.109022  | -0.852136 | 0.410673  |
| 4  | C | -0.962009 | -0.513053 | -0.321050 |
| 5  | H | 0.001572  | -1.134688 | 1.463776  |
| 6  | H | -0.791017 | -0.242589 | -1.368196 |
| 7  | F | 1.961380  | -2.251822 | 0.169389  |
| 8  | C | 2.472512  | -0.014113 | 0.744574  |
| 9  | H | 2.210183  | -0.193006 | 1.795498  |
| 10 | C | 2.183271  | 1.452049  | 0.483713  |
| 11 | O | 1.417721  | 2.046585  | 1.213799  |
| 12 | C | 3.921565  | -0.463579 | 0.608453  |
| 13 | O | 4.598518  | -0.567315 | 1.610376  |
| 14 | C | 2.814834  | 2.133023  | -0.707700 |

|    |   |           |           |           |
|----|---|-----------|-----------|-----------|
| 15 | H | 2.813357  | 1.415633  | -1.539764 |
| 16 | H | 2.167948  | 2.981365  | -0.971504 |
| 17 | C | 4.224259  | 2.642016  | -0.384949 |
| 18 | H | 4.903497  | 1.832005  | -0.081170 |
| 19 | H | 4.663720  | 3.132490  | -1.263769 |
| 20 | H | 4.191072  | 3.374207  | 0.434107  |
| 21 | C | 4.488433  | -0.824438 | -0.746328 |
| 22 | H | 3.876910  | -1.668038 | -1.099587 |
| 23 | H | 4.266626  | -0.017764 | -1.458118 |
| 24 | C | 5.970514  | -1.153293 | -0.693969 |
| 25 | H | 6.163332  | -1.984737 | -0.003013 |
| 26 | H | 6.341350  | -1.434623 | -1.688510 |
| 27 | H | 6.555054  | -0.291418 | -0.340068 |
| 28 | C | -2.312814 | -0.494238 | 0.201403  |
| 29 | C | -3.405193 | -0.161583 | -0.524996 |
| 30 | H | -2.444761 | -0.768660 | 1.254445  |
| 31 | H | -3.296795 | 0.115657  | -1.577663 |
| 32 | C | -4.726380 | -0.161116 | 0.052358  |
| 33 | C | -5.840070 | 0.160169  | -0.626556 |
| 34 | H | -4.834634 | -0.437663 | 1.105135  |
| 35 | H | -5.905648 | 0.455434  | -1.670999 |
| 36 | N | -7.127330 | 0.134508  | 0.030441  |
| 37 | O | -7.197284 | -0.179763 | 1.200475  |
| 38 | O | -8.087591 | 0.437899  | -0.648730 |

**8c-TS (Frequency: 339.6679 i cm<sup>-1</sup>)**

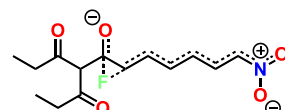

|    |   |           |           |           |
|----|---|-----------|-----------|-----------|
| 1  | C | 1.370564  | 0.366281  | -0.337456 |
| 2  | O | 1.530807  | 0.458724  | -1.534355 |
| 3  | C | 0.021028  | 0.144286  | 0.266765  |
| 4  | C | -1.096955 | 0.108957  | -0.532653 |
| 5  | H | -0.089189 | 0.338419  | 1.334455  |
| 6  | H | -0.965393 | 0.056716  | -1.616332 |
| 7  | F | 0.839705  | -1.556420 | 0.633085  |
| 8  | C | 2.538012  | 0.439662  | 0.641943  |
| 9  | H | 2.160767  | 0.552461  | 1.663563  |
| 10 | C | 3.446756  | 1.649936  | 0.397350  |
| 11 | O | 3.533299  | 2.505337  | 1.246534  |
| 12 | C | 3.368229  | -0.860040 | 0.659566  |
| 13 | O | 3.921533  | -1.168876 | 1.687218  |
| 14 | C | 4.267020  | 1.720488  | -0.870852 |
| 15 | H | 3.756215  | 1.185360  | -1.680530 |
| 16 | H | 4.342345  | 2.782356  | -1.144215 |
| 17 | C | 5.672960  | 1.157630  | -0.624232 |
| 18 | H | 5.650220  | 0.094310  | -0.344256 |
| 19 | H | 6.283513  | 1.252321  | -1.531508 |
| 20 | H | 6.167462  | 1.710553  | 0.186133  |

|    |   |           |           |           |
|----|---|-----------|-----------|-----------|
| 21 | C | 3.493153  | -1.674466 | -0.603899 |
| 22 | H | 2.478187  | -2.069753 | -0.764064 |
| 23 | H | 3.691316  | -1.000705 | -1.451222 |
| 24 | C | 4.525919  | -2.782219 | -0.487953 |
| 25 | H | 4.286387  | -3.448216 | 0.351361  |
| 26 | H | 4.557678  | -3.379501 | -1.408368 |
| 27 | H | 5.531543  | -2.374466 | -0.308432 |
| 28 | C | -2.400826 | 0.096958  | 0.018307  |
| 29 | C | -3.579767 | 0.045159  | -0.685354 |
| 30 | H | -2.473292 | 0.144226  | 1.112660  |
| 31 | H | -3.557102 | -0.009497 | -1.777664 |
| 32 | C | -4.835020 | 0.060507  | -0.021688 |
| 33 | C | -6.047337 | 0.011042  | -0.632032 |
| 34 | H | -4.837845 | 0.115394  | 1.071425  |
| 35 | H | -6.227421 | -0.045711 | -1.702205 |
| 36 | N | -7.246209 | 0.031198  | 0.137394  |
| 37 | O | -7.190924 | 0.093186  | 1.355282  |
| 38 | O | -8.301179 | -0.015866 | -0.476829 |

**8c-IM2**

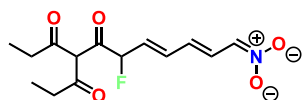

|    |   |           |           |           |
|----|---|-----------|-----------|-----------|
| 1  | C | -1.394137 | -0.823593 | 0.090006  |
| 2  | O | -1.213849 | -1.459335 | -0.916698 |
| 3  | C | -0.217574 | -0.254982 | 0.887075  |
| 4  | C | 0.904379  | 0.219521  | 0.043010  |
| 5  | H | 0.120603  | -1.056519 | 1.566598  |
| 6  | H | 0.656282  | 0.828927  | -0.832309 |
| 7  | F | -0.739995 | 0.763211  | 1.700622  |
| 8  | C | -2.774287 | -0.585564 | 0.687854  |
| 9  | H | -2.736399 | -0.822808 | 1.760152  |
| 10 | C | -3.827871 | -1.511873 | 0.066494  |
| 11 | O | -4.340488 | -2.364683 | 0.747728  |
| 12 | C | -3.231297 | 0.886392  | 0.603248  |
| 13 | O | -4.048209 | 1.290818  | 1.390299  |
| 14 | C | -4.236047 | -1.292002 | -1.372454 |
| 15 | H | -3.399771 | -0.873351 | -1.946677 |
| 16 | H | -4.472088 | -2.280884 | -1.789281 |
| 17 | C | -5.475285 | -0.391165 | -1.454383 |
| 18 | H | -5.280402 | 0.620901  | -1.071153 |
| 19 | H | -5.802434 | -0.297002 | -2.497682 |
| 20 | H | -6.299613 | -0.821848 | -0.869871 |
| 21 | C | -2.658683 | 1.741054  | -0.500600 |
| 22 | H | -1.577434 | 1.823419  | -0.295005 |
| 23 | H | -2.736471 | 1.180393  | -1.447309 |
| 24 | C | -3.306327 | 3.111407  | -0.591703 |
| 25 | H | -3.203855 | 3.649473  | 0.359520  |
| 26 | H | -2.837715 | 3.707631  | -1.384327 |

|    |   |           |           |           |
|----|---|-----------|-----------|-----------|
| 27 | H | -4.379395 | 3.023963  | -0.811984 |
| 28 | C | 2.195541  | -0.075061 | 0.327973  |
| 29 | C | 3.353031  | 0.341553  | -0.406638 |
| 30 | H | 2.390589  | -0.703756 | 1.207604  |
| 31 | H | 3.206248  | 0.970540  | -1.290871 |
| 32 | C | 4.620512  | -0.027086 | -0.029776 |
| 33 | C | 5.821828  | 0.317218  | -0.669710 |
| 34 | H | 4.733568  | -0.655355 | 0.859980  |
| 35 | H | 5.890512  | 0.931925  | -1.562988 |
| 36 | N | 7.032341  | -0.118370 | -0.191532 |
| 37 | O | 7.099901  | -0.830884 | 0.826272  |
| 38 | O | 8.067477  | 0.213973  | -0.797806 |

**8d-IM1**

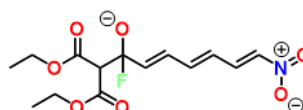

|    |   |           |           |           |
|----|---|-----------|-----------|-----------|
| 1  | C | -1.889526 | 0.327436  | 1.546585  |
| 2  | O | -1.712716 | 1.300466  | 2.318374  |
| 3  | C | -0.650397 | -0.390133 | 1.012905  |
| 4  | C | 0.566891  | 0.151106  | 1.171751  |
| 5  | H | -0.789789 | -1.322506 | 0.457715  |
| 6  | H | 0.633833  | 1.092865  | 1.726340  |
| 7  | F | -2.644998 | -0.797477 | 2.192475  |
| 8  | C | -2.888868 | 0.635950  | 0.301205  |
| 9  | H | -3.565114 | 1.392038  | 0.715843  |
| 10 | C | -3.711954 | -0.559741 | -0.083848 |
| 11 | O | -4.910359 | -0.629604 | 0.043324  |
| 12 | C | -2.114675 | 1.230550  | -0.843610 |
| 13 | O | -1.910044 | 0.707839  | -1.912104 |
| 14 | C | -3.676797 | -2.783808 | -0.841213 |
| 15 | H | -4.459751 | -2.575012 | -1.584846 |
| 16 | H | -4.177578 | -3.134005 | 0.073920  |
| 17 | C | -0.766060 | 3.041982  | -1.489708 |
| 18 | H | -1.324318 | 3.198350  | -2.424518 |
| 19 | H | 0.058836  | 2.348108  | -1.710988 |
| 20 | C | 1.778367  | -0.440953 | 0.642295  |
| 21 | C | 3.010139  | 0.104499  | 0.773169  |
| 22 | H | 1.675743  | -1.386801 | 0.097786  |
| 23 | H | 3.133632  | 1.048855  | 1.311543  |
| 24 | C | 4.180930  | -0.525419 | 0.215560  |
| 25 | C | 5.421625  | -0.020320 | 0.316012  |
| 26 | H | 4.058005  | -1.469602 | -0.322862 |
| 27 | H | 5.712541  | 0.901450  | 0.814023  |
| 28 | N | 6.542399  | -0.715973 | -0.274699 |
| 29 | O | 6.357613  | -1.762778 | -0.860094 |
| 30 | O | 7.631904  | -0.194672 | -0.145437 |
| 31 | C | -2.667625 | -3.785176 | -1.351094 |
| 32 | H | -1.901865 | -3.986242 | -0.589325 |

|    |   |           |           |           |
|----|---|-----------|-----------|-----------|
| 33 | H | -3.168409 | -4.730238 | -1.598751 |
| 34 | H | -2.171559 | -3.405459 | -2.254654 |
| 35 | C | -0.268001 | 4.341055  | -0.902888 |
| 36 | H | 0.405559  | 4.839005  | -1.612480 |
| 37 | H | -1.107446 | 5.015447  | -0.686170 |
| 38 | H | 0.281488  | 4.155424  | 0.030058  |
| 39 | O | -2.979926 | -1.572900 | -0.548142 |
| 40 | O | -1.630214 | 2.432306  | -0.527763 |

**8d-TS (Frequency: 315.7478 i cm<sup>-1</sup>)**

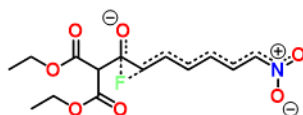

|    |   |           |           |           |
|----|---|-----------|-----------|-----------|
| 1  | C | -1.784044 | -0.285504 | -1.612573 |
| 2  | O | -1.752780 | -0.698282 | -2.746899 |
| 3  | C | -0.558466 | 0.136623  | -0.872194 |
| 4  | C | 0.686330  | -0.124830 | -1.390913 |
| 5  | H | -0.670925 | 0.354139  | 0.189747  |
| 6  | H | 0.764249  | -0.476759 | -2.422651 |
| 7  | F | -1.319780 | 1.862261  | -1.323183 |
| 8  | C | -3.122894 | -0.236194 | -0.859707 |
| 9  | H | -3.912516 | -0.452897 | -1.590089 |
| 10 | C | -3.405828 | 1.138791  | -0.274503 |
| 11 | O | -4.156307 | 1.939564  | -0.759337 |
| 12 | C | -3.212520 | -1.287522 | 0.237903  |
| 13 | O | -4.181250 | -1.444126 | 0.931189  |
| 14 | C | -2.611099 | 2.669823  | 1.304660  |
| 15 | H | -3.603968 | 3.085022  | 1.529732  |
| 16 | H | -2.176103 | 3.218124  | 0.457611  |
| 17 | C | -2.066627 | -3.027031 | 1.345859  |
| 18 | H | -2.878157 | -3.742439 | 1.151103  |
| 19 | H | -2.262786 | -2.552984 | 2.318008  |
| 20 | C | 1.861569  | 0.092845  | -0.632038 |
| 21 | C | 3.151682  | -0.121462 | -1.052823 |
| 22 | H | 1.722941  | 0.458742  | 0.393823  |
| 23 | H | 3.336767  | -0.480872 | -2.069297 |
| 24 | C | 4.257259  | 0.115721  | -0.194108 |
| 25 | C | 5.561610  | -0.067051 | -0.525961 |
| 26 | H | 4.053999  | 0.476300  | 0.819102  |
| 27 | H | 5.938650  | -0.417486 | -1.483038 |
| 28 | N | 6.594044  | 0.204794  | 0.417000  |
| 29 | O | 6.312245  | 0.607867  | 1.534326  |
| 30 | O | 7.744163  | 0.015618  | 0.050992  |
| 31 | C | -1.706797 | 2.677092  | 2.513408  |
| 32 | H | -0.718941 | 2.269742  | 2.256944  |
| 33 | H | -1.574645 | 3.705296  | 2.874959  |
| 34 | H | -2.135267 | 2.074912  | 3.326334  |
| 35 | C | -0.704985 | -3.675588 | 1.290162  |
| 36 | H | -0.635612 | -4.459690 | 2.055039  |

|    |   |           |           |          |
|----|---|-----------|-----------|----------|
| 37 | H | -0.533383 | -4.131043 | 0.305716 |
| 38 | H | 0.083709  | -2.934089 | 1.476589 |
| 39 | O | -2.755674 | 1.312659  | 0.874481 |
| 40 | O | -2.104077 | -2.011076 | 0.332370 |

**8d-IM2**

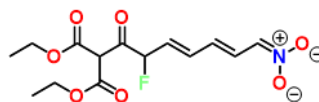

|    |   |           |           |           |
|----|---|-----------|-----------|-----------|
| 1  | C | 1.649772  | -0.136201 | -1.681073 |
| 2  | O | 1.384572  | 0.160275  | -2.813537 |
| 3  | C | 0.658349  | -0.849622 | -0.752506 |
| 4  | C | -0.704667 | -0.970159 | -1.305840 |
| 5  | H | 0.654406  | -0.344750 | 0.224249  |
| 6  | H | -0.797389 | -1.306109 | -2.342305 |
| 7  | F | 1.261068  | -2.112298 | -0.549025 |
| 8  | C | 3.032197  | 0.207996  | -1.101867 |
| 9  | H | 3.729173  | 0.325769  | -1.939947 |
| 10 | C | 3.572641  | -0.880689 | -0.184430 |
| 11 | O | 4.336716  | -1.739291 | -0.525402 |
| 12 | C | 2.981023  | 1.529704  | -0.337933 |
| 13 | O | 3.958603  | 2.130770  | 0.009931  |
| 14 | C | 3.317016  | -1.837077 | 1.951339  |
| 15 | H | 4.397341  | -1.878265 | 2.149502  |
| 16 | H | 3.023007  | -2.774991 | 1.459342  |
| 17 | C | 1.546573  | 3.126067  | 0.647751  |
| 18 | H | 2.018725  | 3.949364  | 0.093729  |
| 19 | H | 2.068902  | 3.021187  | 1.609107  |
| 20 | C | -1.800611 | -0.659445 | -0.572329 |
| 21 | C | -3.168805 | -0.725532 | -0.995925 |
| 22 | H | -1.639340 | -0.310390 | 0.457168  |
| 23 | H | -3.379622 | -1.067354 | -2.014630 |
| 24 | C | -4.200025 | -0.374939 | -0.161326 |
| 25 | C | -5.572627 | -0.396676 | -0.460142 |
| 26 | H | -3.952765 | -0.038634 | 0.851040  |
| 27 | H | -5.990746 | -0.699503 | -1.416225 |
| 28 | N | -6.508071 | -0.021000 | 0.470178  |
| 29 | O | -6.166979 | 0.346515  | 1.609599  |
| 30 | O | -7.712086 | -0.054270 | 0.153838  |
| 31 | C | 2.513620  | -1.574406 | 3.201026  |
| 32 | H | 1.440941  | -1.540833 | 2.966460  |
| 33 | H | 2.686702  | -2.377419 | 3.928912  |
| 34 | H | 2.806133  | -0.619543 | 3.657965  |
| 35 | C | 0.061298  | 3.327427  | 0.820952  |
| 36 | H | -0.123531 | 4.251899  | 1.382825  |
| 37 | H | -0.434910 | 3.406478  | -0.155528 |
| 38 | H | -0.381240 | 2.488337  | 1.374693  |
| 39 | O | 3.060643  | -0.762438 | 1.035452  |
| 40 | O | 1.734352  | 1.912656  | -0.100201 |

**9-IM1**

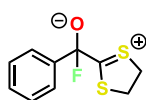

|    |   |           |           |           |
|----|---|-----------|-----------|-----------|
| 1  | C | 3.893563  | -0.890078 | 0.317612  |
| 2  | C | 3.188963  | -1.048362 | -0.877291 |
| 3  | C | 1.987124  | -0.368157 | -1.075574 |
| 4  | C | 1.483315  | 0.469738  | -0.075673 |
| 5  | C | 2.193115  | 0.631562  | 1.114205  |
| 6  | C | 3.395917  | -0.046521 | 1.312469  |
| 7  | H | 4.834253  | -1.421430 | 0.471255  |
| 8  | H | 3.581381  | -1.698811 | -1.660806 |
| 9  | H | 1.438657  | -0.475785 | -2.012999 |
| 10 | H | 1.786298  | 1.304850  | 1.870133  |
| 11 | H | 3.948991  | 0.084142  | 2.244209  |
| 12 | C | 0.150149  | 1.211200  | -0.227055 |
| 13 | O | -0.044164 | 2.243630  | 0.464902  |
| 14 | C | -1.057266 | 0.189987  | -0.047357 |
| 15 | C | -3.520838 | -0.614094 | 0.095859  |
| 16 | C | -2.659459 | -1.800565 | 0.479409  |
| 17 | S | -0.956247 | -1.480626 | -0.127378 |
| 18 | S | -2.530853 | 0.911982  | 0.311189  |
| 19 | H | -3.827259 | -0.649168 | -0.958134 |
| 20 | H | -4.410396 | -0.537112 | 0.732390  |
| 21 | H | -3.014979 | -2.733058 | 0.025192  |
| 22 | H | -2.578532 | -1.929112 | 1.567169  |
| 23 | F | 0.006778  | 1.421833  | -1.670914 |

**9-TS (Frequency: 349.8528 i cm<sup>-1</sup>)**

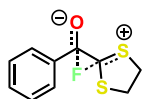

|    |   |           |           |           |
|----|---|-----------|-----------|-----------|
| 1  | C | -4.035580 | -0.771015 | -0.258131 |
| 2  | C | -3.149681 | -1.261071 | 0.703121  |
| 3  | C | -1.899034 | -0.668555 | 0.872188  |
| 4  | C | -1.528595 | 0.418377  | 0.072295  |
| 5  | C | -2.422854 | 0.916041  | -0.879625 |
| 6  | C | -3.672493 | 0.321021  | -1.047343 |
| 7  | H | -5.013493 | -1.237468 | -0.387468 |
| 8  | H | -3.438410 | -2.104039 | 1.332765  |
| 9  | H | -1.209383 | -1.018795 | 1.639494  |
| 10 | H | -2.126383 | 1.776186  | -1.481684 |
| 11 | H | -4.365309 | 0.711487  | -1.794261 |
| 12 | C | -0.185252 | 1.104209  | 0.165654  |
| 13 | O | -0.065130 | 2.297916  | -0.069077 |
| 14 | C | 1.047521  | 0.225955  | -0.007046 |
| 15 | C | 3.547910  | -0.458881 | -0.068113 |
| 16 | F | 0.315288  | 0.648172  | 1.813651  |

|    |   |          |           |           |
|----|---|----------|-----------|-----------|
| 17 | C | 2.786114 | -1.603617 | -0.702409 |
| 18 | S | 1.026367 | -1.461012 | -0.207389 |
| 19 | S | 2.517764 | 1.046079  | -0.194816 |
| 20 | H | 3.742013 | -0.632116 | 0.998495  |
| 21 | H | 4.494742 | -0.265139 | -0.586364 |
| 22 | H | 3.152495 | -2.579039 | -0.360321 |
| 23 | H | 2.812741 | -1.563795 | -1.799174 |

**9-IM2**

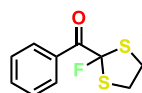

|    |   |           |           |           |
|----|---|-----------|-----------|-----------|
| 1  | C | -4.219960 | -0.659465 | 0.037827  |
| 2  | C | -3.994152 | 0.647599  | -0.400772 |
| 3  | C | -2.699481 | 1.153071  | -0.430831 |
| 4  | C | -1.618334 | 0.359533  | -0.020517 |
| 5  | C | -1.850688 | -0.950424 | 0.424410  |
| 6  | C | -3.149718 | -1.454914 | 0.447064  |
| 7  | H | -5.234953 | -1.059016 | 0.061149  |
| 8  | H | -4.830145 | 1.270528  | -0.720857 |
| 9  | H | -2.500683 | 2.168435  | -0.775010 |
| 10 | H | -1.028378 | -1.581981 | 0.759356  |
| 11 | H | -3.325481 | -2.474634 | 0.791095  |
| 12 | C | -0.259880 | 0.979111  | -0.110372 |
| 13 | O | -0.090394 | 2.091717  | -0.543235 |
| 14 | C | 0.954112  | 0.147335  | 0.355374  |
| 15 | C | 3.529080  | -0.293035 | 0.243988  |
| 16 | C | 3.026139  | -1.085500 | -0.948250 |
| 17 | S | 1.210587  | -1.259149 | -0.792779 |
| 18 | S | 2.448377  | 1.162466  | 0.401409  |
| 19 | H | 3.488875  | -0.884511 | 1.168005  |
| 20 | H | 4.553389  | 0.069293  | 0.087537  |
| 21 | H | 3.450408  | -2.097977 | -0.972186 |
| 22 | H | 3.251452  | -0.570542 | -1.890422 |
| 23 | F | 0.672504  | -0.342919 | 1.612402  |

**10-IM1**

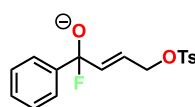

|   |   |           |           |           |
|---|---|-----------|-----------|-----------|
| 1 | C | -3.436700 | -0.054892 | -1.815479 |
| 2 | C | -2.557569 | -1.028899 | -1.339541 |
| 3 | C | -2.233142 | -1.096341 | 0.020669  |
| 4 | C | -2.814236 | -0.177052 | 0.895036  |
| 5 | C | -3.711739 | 0.784573  | 0.429830  |
| 6 | C | -4.020573 | 0.853809  | -0.929685 |
| 7 | H | -3.677086 | -0.010974 | -2.879679 |
| 8 | H | -2.130531 | -1.752338 | -2.037291 |
| 9 | H | -2.540759 | -0.253532 | 1.948751  |

|    |   |           |           |           |
|----|---|-----------|-----------|-----------|
| 10 | H | -4.170222 | 1.488548  | 1.127595  |
| 11 | H | -4.715250 | 1.611075  | -1.298576 |
| 12 | C | -1.280858 | -2.167106 | 0.610281  |
| 13 | O | -1.073093 | -2.092606 | 1.861351  |
| 14 | C | -0.035001 | -2.300124 | -0.275872 |
| 15 | C | 1.182717  | -2.082709 | 0.217137  |
| 16 | H | 1.256842  | -1.812685 | 1.275122  |
| 17 | C | 2.433707  | -2.173968 | -0.597641 |
| 18 | H | 3.269810  | -2.589276 | -0.018960 |
| 19 | H | 2.281041  | -2.776914 | -1.500135 |
| 20 | O | 2.864830  | -0.890210 | -1.129173 |
| 21 | S | 3.178847  | 0.307361  | -0.114032 |
| 22 | O | 3.583206  | -0.250337 | 1.165499  |
| 23 | O | 4.078850  | 1.173813  | -0.846961 |
| 24 | C | 1.628953  | 1.137672  | 0.065305  |
| 25 | C | 1.024342  | 1.676395  | -1.071220 |
| 26 | C | 1.085022  | 1.310798  | 1.334095  |
| 27 | C | -0.139251 | 2.421456  | -0.919471 |
| 28 | H | 1.462781  | 1.520003  | -2.058201 |
| 29 | C | -0.073522 | 2.073559  | 1.466015  |
| 30 | H | 1.572371  | 0.865619  | 2.202144  |
| 31 | C | -0.689982 | 2.653954  | 0.350920  |
| 32 | H | -0.621311 | 2.849841  | -1.800537 |
| 33 | H | -0.503431 | 2.226755  | 2.457700  |
| 34 | C | -1.885494 | 3.551548  | 0.509536  |
| 35 | H | -2.411163 | 3.351445  | 1.451669  |
| 36 | H | -1.564100 | 4.604931  | 0.518204  |
| 37 | H | -2.590637 | 3.422234  | -0.321742 |
| 38 | H | -0.164067 | -2.575477 | -1.329135 |
| 39 | F | -2.011803 | -3.434261 | 0.220265  |

10-TS (Frequency: 289.5923 i cm<sup>-1</sup>)

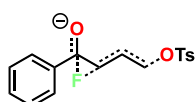

|    |   |           |           |           |
|----|---|-----------|-----------|-----------|
| 1  | C | -3.912092 | -0.452609 | -1.514385 |
| 2  | C | -2.688145 | -0.966064 | -1.084602 |
| 3  | C | -2.309787 | -0.846204 | 0.257823  |
| 4  | C | -3.175849 | -0.220316 | 1.162688  |
| 5  | C | -4.401244 | 0.284968  | 0.735638  |
| 6  | C | -4.769905 | 0.171915  | -0.606836 |
| 7  | H | -4.205322 | -0.554414 | -2.560507 |
| 8  | H | -2.041621 | -1.515250 | -1.767603 |
| 9  | H | -2.867920 | -0.143665 | 2.206630  |
| 10 | H | -5.069842 | 0.772162  | 1.447351  |
| 11 | H | -5.728457 | 0.568618  | -0.945893 |
| 12 | C | -1.003702 | -1.383509 | 0.784194  |
| 13 | O | -0.835976 | -1.467897 | 1.983460  |
| 14 | C | 0.055865  | -1.816566 | -0.203004 |

|    |   |           |           |           |
|----|---|-----------|-----------|-----------|
| 15 | C | 1.328570  | -2.067098 | 0.293945  |
| 16 | H | 1.449150  | -2.211304 | 1.367572  |
| 17 | C | 2.500979  | -2.139997 | -0.568113 |
| 18 | H | 3.346790  | -2.667078 | -0.109188 |
| 19 | H | 2.309816  | -2.554875 | -1.566134 |
| 20 | O | 3.132233  | -0.801115 | -1.012277 |
| 21 | S | 3.292627  | 0.385649  | 0.007392  |
| 22 | O | 3.608613  | -0.112650 | 1.338135  |
| 23 | O | 4.220880  | 1.311522  | -0.626024 |
| 24 | C | 1.699284  | 1.159701  | 0.025945  |
| 25 | C | 1.192026  | 1.654093  | -1.176437 |
| 26 | C | 0.985247  | 1.262630  | 1.212394  |
| 27 | C | -0.068957 | 2.237585  | -1.182490 |
| 28 | H | 1.773644  | 1.567567  | -2.095814 |
| 29 | C | -0.272673 | 1.863767  | 1.190673  |
| 30 | H | 1.401448  | 0.848899  | 2.131028  |
| 31 | C | -0.821626 | 2.346701  | -0.002298 |
| 32 | H | -0.483874 | 2.614950  | -2.119657 |
| 33 | H | -0.848374 | 1.938500  | 2.115568  |
| 34 | C | -2.198571 | 2.948571  | -0.044198 |
| 35 | H | -2.620874 | 3.054405  | 0.963188  |
| 36 | H | -2.181461 | 3.936619  | -0.526447 |
| 37 | H | -2.873427 | 2.303464  | -0.627907 |
| 38 | H | -0.006169 | -1.324723 | -1.181461 |
| 39 | F | -0.875340 | -3.163171 | -0.666774 |

10-IM2

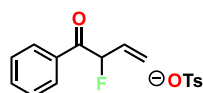

|    |   |           |           |           |
|----|---|-----------|-----------|-----------|
| 1  | C | 3.493113  | -0.903226 | -1.855300 |
| 2  | C | 2.479282  | -0.099887 | -1.336545 |
| 3  | C | 2.671428  | 0.567319  | -0.119850 |
| 4  | C | 3.889668  | 0.437767  | 0.558760  |
| 5  | C | 4.907320  | -0.350316 | 0.030798  |
| 6  | C | 4.705848  | -1.027450 | -1.174503 |
| 7  | H | 3.337370  | -1.432392 | -2.796246 |
| 8  | H | 1.536112  | -0.004727 | -1.874793 |
| 9  | H | 4.016199  | 0.958507  | 1.509075  |
| 10 | H | 5.856366  | -0.444985 | 0.560020  |
| 11 | H | 5.498802  | -1.653469 | -1.586790 |
| 12 | C | 1.590669  | 1.363178  | 0.536743  |
| 13 | O | 1.654941  | 1.674832  | 1.704143  |
| 14 | C | 0.378526  | 1.782468  | -0.303673 |
| 15 | C | -0.412564 | 2.870184  | 0.353518  |
| 16 | H | 0.167577  | 3.704450  | 0.758443  |
| 17 | C | -1.742031 | 2.854411  | 0.429683  |
| 18 | H | -2.282476 | 3.680826  | 0.897390  |
| 19 | H | -2.334940 | 2.027809  | 0.027562  |

|    |   |           |           |           |
|----|---|-----------|-----------|-----------|
| 20 | O | -3.287310 | 0.420393  | -1.605331 |
| 21 | S | -3.646003 | -0.398436 | -0.425050 |
| 22 | O | -4.261097 | 0.386656  | 0.665154  |
| 23 | O | -4.390425 | -1.623362 | -0.774511 |
| 24 | C | -2.065391 | -0.959150 | 0.214554  |
| 25 | C | -1.241314 | -1.726772 | -0.611649 |
| 26 | C | -1.633427 | -0.577644 | 1.480467  |
| 27 | C | 0.021465  | -2.102525 | -0.164125 |
| 28 | H | -1.588031 | -2.013720 | -1.606379 |
| 29 | C | -0.364094 | -0.959345 | 1.919077  |
| 30 | H | -2.290820 | 0.031101  | 2.102261  |
| 31 | C | 0.481234  | -1.724142 | 1.107335  |
| 32 | H | 0.674186  | -2.689971 | -0.814478 |
| 33 | H | -0.016027 | -0.641986 | 2.904650  |
| 34 | C | 1.843796  | -2.144148 | 1.589916  |
| 35 | H | 2.256570  | -1.404060 | 2.289444  |
| 36 | H | 1.789082  | -3.110709 | 2.115042  |
| 37 | H | 2.544019  | -2.255610 | 0.749338  |
| 38 | H | -0.255952 | 0.896743  | -0.487503 |
| 39 | F | 0.853108  | 2.228299  | -1.532567 |

#### 11-IMI

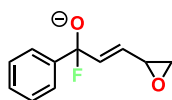

|    |   |           |           |           |
|----|---|-----------|-----------|-----------|
| 1  | C | -3.194370 | -1.140209 | -1.066787 |
| 2  | C | -2.030002 | -0.381449 | -1.200685 |
| 3  | C | -1.465480 | 0.261790  | -0.098762 |
| 4  | C | -2.091483 | 0.142659  | 1.147488  |
| 5  | C | -3.255370 | -0.613826 | 1.288351  |
| 6  | C | -3.809673 | -1.260149 | 0.180308  |
| 7  | H | -3.626770 | -1.637540 | -1.937688 |
| 8  | H | -1.532278 | -0.255605 | -2.163411 |
| 9  | H | -1.665088 | 0.664482  | 2.006563  |
| 10 | H | -3.737903 | -0.696420 | 2.264488  |
| 11 | H | -4.720592 | -1.851712 | 0.289254  |
| 12 | C | -0.160381 | 1.068817  | -0.305970 |
| 13 | O | 0.101632  | 1.402117  | -1.504018 |
| 14 | C | 0.969570  | 0.377161  | 0.474327  |
| 15 | C | 2.115716  | 0.048718  | -0.120105 |
| 16 | H | 0.804543  | 0.147498  | 1.534258  |
| 17 | H | 2.225262  | 0.295749  | -1.182399 |
| 18 | C | 3.256816  | -0.601865 | 0.556377  |
| 19 | C | 4.643497  | -0.360841 | 0.119357  |
| 20 | H | 5.459280  | -0.446785 | 0.844586  |
| 21 | H | 4.820963  | 0.321607  | -0.718880 |
| 22 | O | 3.981276  | -1.561501 | -0.204013 |
| 23 | H | 3.098434  | -0.885325 | 1.603800  |
| 24 | F | -0.406907 | 2.263810  | 0.586697  |

#### 11-TS (Frequency: 94.1027 i cm<sup>-1</sup>)

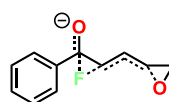

|    |   |           |           |           |
|----|---|-----------|-----------|-----------|
| 1  | C | -3.651834 | 0.450855  | 1.097542  |
| 2  | C | -2.420459 | -0.187194 | 1.215067  |
| 3  | C | -1.529332 | -0.218727 | 0.134383  |
| 4  | C | -1.905703 | 0.367760  | -1.079939 |
| 5  | C | -3.147965 | 0.990955  | -1.204650 |
| 6  | C | -4.017316 | 1.042236  | -0.114881 |
| 7  | H | -4.332705 | 0.486093  | 1.949552  |
| 8  | H | -2.122769 | -0.669672 | 2.147277  |
| 9  | H | -1.238914 | 0.310197  | -1.941330 |
| 10 | H | -3.438583 | 1.436060  | -2.157419 |
| 11 | H | -4.984407 | 1.538559  | -0.211008 |
| 12 | C | -0.219800 | -0.944337 | 0.305995  |
| 13 | O | -0.132593 | -1.818186 | 1.151655  |
| 14 | C | 0.945232  | -0.517006 | -0.534724 |
| 15 | C | 2.083162  | -0.240101 | 0.240237  |
| 16 | H | 0.703237  | 0.274430  | -1.254805 |
| 17 | H | 2.249439  | -0.810212 | 1.158631  |
| 18 | C | 3.138683  | 0.652930  | -0.231386 |
| 19 | C | 4.528649  | 0.646367  | 0.260586  |
| 20 | H | 5.361932  | 0.943717  | -0.389364 |
| 21 | H | 4.797725  | -0.074225 | 1.043835  |
| 22 | O | 3.657075  | 1.681975  | 0.660859  |
| 23 | H | 2.999484  | 1.039958  | -1.250936 |
| 24 | F | 0.998868  | -1.738629 | -1.569323 |

#### 11-IM2

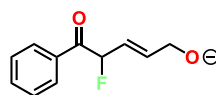

|    |   |           |           |           |
|----|---|-----------|-----------|-----------|
| 1  | C | -3.602489 | -0.164257 | -0.245915 |
| 2  | C | -2.545611 | 0.733709  | -0.381203 |
| 3  | C | -1.236695 | 0.351170  | -0.060249 |
| 4  | C | -0.994174 | -0.960135 | 0.375445  |
| 5  | C | -2.052954 | -1.858526 | 0.504456  |
| 6  | C | -3.358003 | -1.463597 | 0.201511  |
| 7  | H | -4.619130 | 0.148620  | -0.490201 |
| 8  | H | -2.715130 | 1.752656  | -0.732410 |
| 9  | H | 0.030390  | -1.291505 | 0.553652  |
| 10 | H | -1.856253 | -2.880641 | 0.832654  |
| 11 | H | -4.182132 | -2.171476 | 0.305322  |
| 12 | C | -0.162592 | 1.399591  | -0.191769 |
| 13 | O | -0.332853 | 2.353539  | -0.934246 |
| 14 | C | 1.122296  | 1.199797  | 0.559490  |
| 15 | C | 2.005969  | 0.440700  | -0.303623 |



|    |   |          |           |           |
|----|---|----------|-----------|-----------|
| 16 | H | 0.939795 | 0.670379  | 1.508884  |
| 17 | H | 1.931142 | 0.590266  | -1.384971 |
| 18 | C | 2.671467 | -0.745917 | 0.187032  |
| 19 | C | 3.358766 | -1.719675 | -0.668098 |
| 20 | H | 4.258037 | -2.244256 | -0.317146 |
| 21 | H | 3.345692 | -1.548966 | -1.753896 |
| 22 | O | 2.139004 | -2.128951 | -0.099596 |
| 23 | H | 3.002491 | -0.726707 | 1.234851  |
| 24 | F | 1.575556 | 2.514197  | 0.961281  |

### 12-IMI

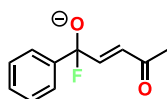

|    |   |           |           |           |
|----|---|-----------|-----------|-----------|
| 1  | C | 3.673121  | 1.204970  | -0.501457 |
| 2  | C | 3.158436  | 0.324338  | -1.454581 |
| 3  | C | 2.017872  | -0.427038 | -1.166348 |
| 4  | C | 1.378745  | -0.307577 | 0.068401  |
| 5  | C | 1.902867  | 0.572635  | 1.021882  |
| 6  | C | 3.043345  | 1.325420  | 0.739842  |
| 7  | H | 4.565271  | 1.793697  | -0.722748 |
| 8  | H | 3.650992  | 0.221857  | -2.423800 |
| 9  | H | 1.599339  | -1.135554 | -1.882982 |
| 10 | H | 1.417179  | 0.649563  | 1.996578  |
| 11 | H | 3.448036  | 2.005297  | 1.492348  |
| 12 | C | 0.102476  | -1.146265 | 0.316451  |
| 13 | O | -0.047740 | -2.169251 | -0.418380 |
| 14 | C | -1.091717 | -0.177028 | 0.397387  |
| 15 | C | -2.173655 | -0.351837 | -0.367511 |
| 16 | H | -2.188182 | -1.210487 | -1.045021 |
| 17 | H | -1.016136 | 0.664174  | 1.095679  |
| 18 | F | 0.235723  | -1.489093 | 1.778093  |
| 19 | C | -3.369855 | 0.519390  | -0.373100 |
| 20 | O | -4.311037 | 0.267017  | -1.101731 |
| 21 | C | -3.396891 | 1.724131  | 0.541729  |
| 22 | H | -3.290098 | 1.411806  | 1.590178  |
| 23 | H | -2.559621 | 2.398586  | 0.313240  |
| 24 | H | -4.346531 | 2.253944  | 0.408408  |

### 12-TS (Frequency: 205.5505 i cm<sup>-1</sup>)

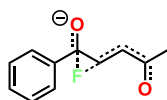

|   |   |          |           |           |
|---|---|----------|-----------|-----------|
| 1 | C | 4.028000 | 0.752218  | -0.477193 |
| 2 | C | 3.782674 | -0.603269 | -0.703790 |
| 3 | C | 2.520942 | -1.133952 | -0.439783 |
| 4 | C | 1.495031 | -0.311135 | 0.038213  |
| 5 | C | 1.746956 | 1.046012  | 0.275309  |
| 6 | C | 3.011902 | 1.572347  | 0.018985  |

|    |   |           |           |           |
|----|---|-----------|-----------|-----------|
| 7  | H | 5.015551  | 1.169468  | -0.681692 |
| 8  | H | 4.576613  | -1.246579 | -1.086578 |
| 9  | H | 2.312095  | -2.192104 | -0.605832 |
| 10 | H | 0.946856  | 1.637878  | 0.719297  |
| 11 | H | 3.211105  | 2.627201  | 0.215626  |
| 12 | C | 0.142613  | -0.929711 | 0.264915  |
| 13 | O | 0.050519  | -2.109012 | 0.540527  |
| 14 | C | -1.066582 | -0.077270 | 0.035353  |
| 15 | C | -2.297398 | -0.656257 | -0.084727 |
| 16 | H | -2.418340 | -1.715808 | 0.150977  |
| 17 | H | -0.888546 | 0.919502  | -0.365760 |
| 18 | F | -0.589123 | 0.603426  | 1.790465  |
| 19 | C | -3.498960 | 0.085105  | -0.416205 |
| 20 | O | -4.593921 | -0.455869 | -0.532450 |
| 21 | C | -3.377989 | 1.590227  | -0.604670 |
| 22 | H | -2.891000 | 2.046875  | 0.267919  |
| 23 | H | -2.759738 | 1.821059  | -1.485024 |
| 24 | H | -4.378391 | 2.014835  | -0.746190 |

### 12-IM2

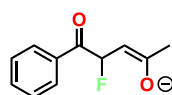

|    |   |           |           |           |
|----|---|-----------|-----------|-----------|
| 1  | C | -4.133028 | -0.716945 | -0.217356 |
| 2  | C | -3.920179 | 0.663238  | -0.251897 |
| 3  | C | -2.625746 | 1.166533  | -0.163292 |
| 4  | C | -1.531577 | 0.300569  | -0.036206 |
| 5  | C | -1.752770 | -1.082649 | 0.003608  |
| 6  | C | -3.049444 | -1.586640 | -0.089633 |
| 7  | H | -5.146506 | -1.115175 | -0.288711 |
| 8  | H | -4.766059 | 1.345222  | -0.349987 |
| 9  | H | -2.436067 | 2.240113  | -0.194176 |
| 10 | H | -0.913496 | -1.765204 | 0.130410  |
| 11 | H | -3.214714 | -2.664463 | -0.058087 |
| 12 | C | -0.155689 | 0.910979  | 0.021437  |
| 13 | O | -0.024388 | 2.112091  | -0.044098 |
| 14 | C | 1.044651  | -0.033316 | 0.161879  |
| 15 | C | 2.339414  | 0.619493  | 0.171352  |
| 16 | H | 2.395339  | 1.649770  | 0.529022  |
| 17 | H | 0.964017  | -0.821963 | -0.603954 |
| 18 | F | 0.718864  | -0.750749 | 1.392282  |
| 19 | C | 3.533418  | -0.018158 | -0.192175 |
| 20 | O | 4.670032  | 0.508712  | -0.174746 |
| 21 | C | 3.447541  | -1.480407 | -0.667656 |
| 22 | H | 2.863666  | -2.107945 | 0.020548  |
| 23 | H | 2.972209  | -1.548188 | -1.659637 |
| 24 | H | 4.467128  | -1.878024 | -0.745573 |

### 13-IMI

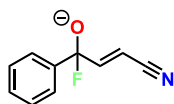

|    |   |           |           |           |
|----|---|-----------|-----------|-----------|
| 1  | C | -3.405637 | -1.099755 | -0.135919 |
| 2  | C | -2.857818 | -0.522783 | -1.282899 |
| 3  | C | -1.644419 | 0.163216  | -1.207499 |
| 4  | C | -0.967649 | 0.279614  | 0.006920  |
| 5  | C | -1.524642 | -0.295028 | 1.154948  |
| 6  | C | -2.736671 | -0.982392 | 1.085071  |
| 7  | H | -4.353967 | -1.637345 | -0.191316 |
| 8  | H | -3.380600 | -0.606681 | -2.237865 |
| 9  | H | -1.195088 | 0.636590  | -2.082009 |
| 10 | H | -1.007031 | -0.185069 | 2.110085  |
| 11 | H | -3.165915 | -1.424510 | 1.986374  |
| 12 | C | 0.383549  | 1.029980  | 0.024682  |
| 13 | O | 0.620544  | 1.790289  | -0.962549 |
| 14 | C | 1.491450  | 0.011604  | 0.366396  |
| 15 | C | 2.562314  | -0.074968 | -0.429222 |
| 16 | H | 2.611933  | 0.595015  | -1.292731 |
| 17 | H | 1.381618  | -0.628893 | 1.247517  |
| 18 | F | 0.321108  | 1.764898  | 1.330754  |
| 19 | C | 3.640402  | -0.989247 | -0.196292 |
| 20 | N | 4.515636  | -1.725277 | -0.019082 |

**13-TS (Frequency: 181.8347 i cm<sup>-1</sup>)**

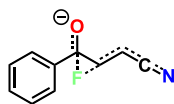

|    |   |           |           |           |
|----|---|-----------|-----------|-----------|
| 1  | C | -3.666130 | 0.666490  | 0.470082  |
| 2  | C | -3.373995 | -0.691966 | 0.603436  |
| 3  | C | -2.084122 | -1.153176 | 0.345113  |
| 4  | C | -1.078441 | -0.258675 | -0.036574 |
| 5  | C | -1.377125 | 1.101736  | -0.182219 |
| 6  | C | -2.668855 | 1.559586  | 0.070801  |
| 7  | H | -4.675465 | 1.029760  | 0.671094  |
| 8  | H | -4.153148 | -1.392009 | 0.909185  |
| 9  | H | -1.837763 | -2.212035 | 0.439531  |
| 10 | H | -0.591538 | 1.757527  | -0.556082 |
| 11 | H | -2.903685 | 2.618054  | -0.053362 |
| 12 | C | 0.302667  | -0.808945 | -0.259834 |
| 13 | O | 0.457111  | -1.968259 | -0.587441 |
| 14 | C | 1.470588  | 0.071643  | 0.056926  |
| 15 | C | 2.708070  | -0.489319 | 0.176220  |
| 16 | H | 2.870109  | -1.518839 | -0.146276 |
| 17 | H | 1.268878  | 1.045686  | 0.501219  |
| 18 | F | 0.974695  | 0.760613  | -1.692366 |
| 19 | C | 3.828367  | 0.259182  | 0.619563  |
| 20 | N | 4.746761  | 0.861867  | 0.997776  |

**13-IM2**

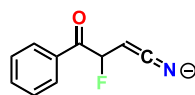

|    |   |           |           |           |
|----|---|-----------|-----------|-----------|
| 1  | C | -3.726614 | -0.667270 | -0.337276 |
| 2  | C | -3.467803 | 0.705284  | -0.366083 |
| 3  | C | -2.166918 | 1.168402  | -0.192823 |
| 4  | C | -1.112055 | 0.267157  | 0.002410  |
| 5  | C | -1.378179 | -1.108107 | 0.034885  |
| 6  | C | -2.682783 | -1.570665 | -0.133503 |
| 7  | H | -4.745724 | -1.033273 | -0.472561 |
| 8  | H | -4.283111 | 1.412596  | -0.524948 |
| 9  | H | -1.941946 | 2.235587  | -0.211002 |
| 10 | H | -0.567411 | -1.811643 | 0.221458  |
| 11 | H | -2.885906 | -2.642009 | -0.101780 |
| 12 | C | 0.274812  | 0.829297  | 0.158525  |
| 13 | O | 0.434385  | 2.020590  | 0.301980  |
| 14 | C | 1.454025  | -0.148561 | 0.130689  |
| 15 | C | 2.749138  | 0.476933  | 0.059621  |
| 16 | H | 2.904251  | 1.437337  | 0.550402  |
| 17 | H | 1.304069  | -0.907877 | -0.652469 |
| 18 | F | 1.187115  | -0.917019 | 1.367031  |
| 19 | C | 3.843235  | -0.190184 | -0.484185 |
| 20 | N | 4.762217  | -0.739426 | -0.965969 |

**14-IMI**

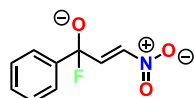

|    |   |           |           |           |
|----|---|-----------|-----------|-----------|
| 1  | C | -3.699013 | -1.159629 | -0.406807 |
| 2  | C | -3.179235 | -0.339161 | -1.409316 |
| 3  | C | -2.010547 | 0.388561  | -1.179085 |
| 4  | C | -1.351846 | 0.304823  | 0.047618  |
| 5  | C | -1.879608 | -0.515274 | 1.051074  |
| 6  | C | -3.046942 | -1.245036 | 0.825961  |
| 7  | H | -4.612530 | -1.730242 | -0.583565 |
| 8  | H | -3.688924 | -0.265406 | -2.372112 |
| 9  | H | -1.583897 | 1.047890  | -1.936511 |
| 10 | H | -1.375764 | -0.565772 | 2.018522  |
| 11 | H | -3.454466 | -1.879473 | 1.615486  |
| 12 | C | -0.053208 | 1.121009  | 0.239747  |
| 13 | O | 0.151473  | 2.063522  | -0.582396 |
| 14 | C | 1.107357  | 0.120511  | 0.421037  |
| 15 | C | 2.185879  | 0.234579  | -0.345493 |
| 16 | H | 2.321805  | 1.002358  | -1.103379 |
| 17 | H | 1.044534  | -0.680793 | 1.162009  |
| 18 | F | -0.178718 | 1.591438  | 1.656810  |
| 19 | N | 3.310003  | -0.679079 | -0.222112 |

|    |   |          |           |           |
|----|---|----------|-----------|-----------|
| 20 | O | 3.263174 | -1.580143 | 0.586954  |
| 21 | O | 4.254186 | -0.478411 | -0.957730 |

**14-TS (Frequency: 182.0771 i cm<sup>-1</sup>)**

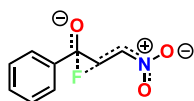

|    |   |           |           |           |
|----|---|-----------|-----------|-----------|
| 1  | C | 4.011596  | 0.695508  | -0.520718 |
| 2  | C | 3.704049  | -0.643741 | -0.762753 |
| 3  | C | 2.428064  | -1.127249 | -0.473486 |
| 4  | C | 1.452075  | -0.275085 | 0.051677  |
| 5  | C | 1.767133  | 1.065729  | 0.303291  |
| 6  | C | 3.043021  | 1.546855  | 0.017556  |
| 7  | H | 5.009290  | 1.076405  | -0.745722 |
| 8  | H | 4.459624  | -1.312435 | -1.178361 |
| 9  | H | 2.170509  | -2.172220 | -0.653220 |
| 10 | H | 1.010036  | 1.688067  | 0.778241  |
| 11 | H | 3.288973  | 2.589666  | 0.225072  |
| 12 | C | 0.081040  | -0.848819 | 0.294903  |
| 13 | O | -0.063528 | -2.039648 | 0.504400  |
| 14 | C | -1.094322 | 0.030321  | 0.017224  |
| 15 | C | -2.318344 | -0.515305 | -0.121976 |
| 16 | H | -2.557492 | -1.562769 | 0.033514  |
| 17 | H | -0.940285 | 1.075778  | -0.241681 |
| 18 | F | -0.398970 | 0.374047  | 1.910972  |
| 19 | N | -3.447457 | 0.299491  | -0.440592 |
| 20 | O | -3.309172 | 1.501275  | -0.589413 |
| 21 | O | -4.522751 | -0.263456 | -0.560832 |

**14-IM2**

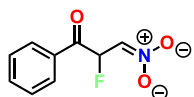

|    |   |           |           |           |
|----|---|-----------|-----------|-----------|
| 1  | C | -4.140129 | -0.624197 | -0.182586 |
| 2  | C | -3.882719 | 0.746496  | -0.100306 |
| 3  | C | -2.569511 | 1.201046  | -0.033607 |
| 4  | C | -1.502478 | 0.292875  | -0.040490 |
| 5  | C | -1.766750 | -1.080941 | -0.119768 |
| 6  | C | -3.082814 | -1.534620 | -0.194008 |
| 7  | H | -5.168952 | -0.983642 | -0.237809 |
| 8  | H | -4.708693 | 1.459015  | -0.090955 |
| 9  | H | -2.344818 | 2.266885  | 0.021841  |
| 10 | H | -0.947671 | -1.799182 | -0.110338 |
| 11 | H | -3.283654 | -2.604785 | -0.258275 |
| 12 | C | -0.109387 | 0.850596  | -0.006243 |
| 13 | O | 0.080013  | 2.042540  | -0.087758 |
| 14 | C | 1.053260  | -0.138789 | 0.124167  |
| 15 | C | 2.353955  | 0.508882  | 0.222953  |
| 16 | H | 2.501399  | 1.518624  | 0.588487  |

|    |   |          |           |           |
|----|---|----------|-----------|-----------|
| 17 | H | 1.047410 | -0.839851 | -0.725412 |
| 18 | F | 0.723452 | -0.937154 | 1.257029  |
| 19 | N | 3.450730 | -0.146581 | -0.201231 |
| 20 | O | 3.365128 | -1.320071 | -0.643918 |
| 21 | O | 4.569638 | 0.416945  | -0.157431 |

**15-IM1**

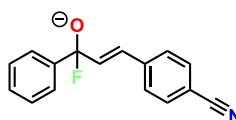

|    |   |           |           |           |
|----|---|-----------|-----------|-----------|
| 1  | C | 4.832535  | 1.859439  | -0.723855 |
| 2  | C | 4.468232  | 0.854186  | -1.621263 |
| 3  | C | 3.554784  | -0.128570 | -1.235728 |
| 4  | C | 2.992988  | -0.119555 | 0.041937  |
| 5  | C | 3.366987  | 0.888066  | 0.938588  |
| 6  | C | 4.280570  | 1.872296  | 0.559564  |
| 7  | H | 5.547166  | 2.629123  | -1.021209 |
| 8  | H | 4.901051  | 0.835848  | -2.623741 |
| 9  | H | 3.261617  | -0.934749 | -1.910130 |
| 10 | H | 2.945823  | 0.883946  | 1.945790  |
| 11 | H | 4.569250  | 2.650740  | 1.268855  |
| 12 | C | 1.962614  | -1.217682 | 0.400397  |
| 13 | O | 2.007047  | -2.275103 | -0.301877 |
| 14 | C | 0.583720  | -0.549002 | 0.549614  |
| 15 | C | -0.473064 | -1.017832 | -0.121343 |
| 16 | H | -0.282821 | -1.892960 | -0.751676 |
| 17 | C | -1.848526 | -0.501115 | -0.092771 |
| 18 | C | -2.839875 | -1.165622 | -0.835390 |
| 19 | C | -2.224261 | 0.635677  | 0.647715  |
| 20 | C | -4.157167 | -0.724562 | -0.843347 |
| 21 | H | -2.564205 | -2.047664 | -1.415990 |
| 22 | C | -3.534784 | 1.088578  | 0.649144  |
| 23 | H | -1.477237 | 1.175199  | 1.230771  |
| 24 | C | -4.510668 | 0.408447  | -0.098053 |
| 25 | H | -4.914111 | -1.252525 | -1.423984 |
| 26 | H | -3.811981 | 1.970823  | 1.226774  |
| 27 | H | 0.512426  | 0.318826  | 1.214695  |
| 28 | F | 2.279749  | -1.472555 | 1.852048  |
| 29 | C | -5.871801 | 0.876081  | -0.098702 |
| 30 | N | -6.964971 | 1.252033  | -0.098942 |

**15-TS (Frequency: 287.3125 i cm<sup>-1</sup>)**

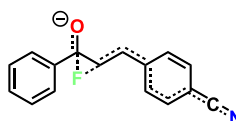

|   |   |          |           |           |
|---|---|----------|-----------|-----------|
| 1 | C | 5.341940 | 1.373373  | -0.669440 |
| 2 | C | 5.333351 | 0.010516  | -0.973677 |
| 3 | C | 4.216670 | -0.762537 | -0.662348 |
| 4 | C | 3.097615 | -0.176161 | -0.059912 |

|    |   |           |           |           |
|----|---|-----------|-----------|-----------|
| 5  | C | 3.112962  | 1.188752  | 0.253626  |
| 6  | C | 4.235159  | 1.958070  | -0.050124 |
| 7  | H | 6.216369  | 1.980353  | -0.910462 |
| 8  | H | 6.199135  | -0.448466 | -1.453671 |
| 9  | H | 4.192503  | -1.830214 | -0.886430 |
| 10 | H | 2.255203  | 1.598915  | 0.786143  |
| 11 | H | 4.251227  | 3.019036  | 0.204833  |
| 12 | C | 1.908819  | -1.051512 | 0.225455  |
| 13 | O | 2.060683  | -2.246526 | 0.384724  |
| 14 | C | 0.553512  | -0.415995 | 0.235587  |
| 15 | C | -0.557667 | -1.220416 | 0.167075  |
| 16 | H | -0.426771 | -2.301286 | 0.252052  |
| 17 | C | -1.892207 | -0.693748 | 0.048962  |
| 18 | C | -2.981862 | -1.523428 | -0.315679 |
| 19 | C | -2.177913 | 0.671673  | 0.309378  |
| 20 | C | -4.262559 | -1.019389 | -0.459275 |
| 21 | H | -2.797895 | -2.583885 | -0.499454 |
| 22 | C | -3.453921 | 1.185576  | 0.158155  |
| 23 | H | -1.375271 | 1.310131  | 0.680489  |
| 24 | C | -4.513673 | 0.347325  | -0.234755 |
| 25 | H | -5.082744 | -1.677172 | -0.750865 |
| 26 | H | -3.648601 | 2.239193  | 0.364487  |
| 27 | H | 0.494658  | 0.604062  | -0.147605 |
| 28 | F | 0.984717  | 0.273859  | 1.921572  |
| 29 | C | -5.838575 | 0.875195  | -0.384001 |
| 30 | N | -6.907949 | 1.301863  | -0.506517 |

**15-IM2**

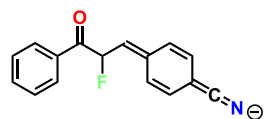

|    |   |           |           |           |
|----|---|-----------|-----------|-----------|
| 1  | C | -5.569594 | -1.225743 | -0.249277 |
| 2  | C | -5.567745 | 0.167968  | -0.344902 |
| 3  | C | -4.364915 | 0.864391  | -0.281716 |
| 4  | C | -3.153633 | 0.179254  | -0.116392 |
| 5  | C | -3.162692 | -1.218639 | -0.016589 |
| 6  | C | -4.367916 | -1.915902 | -0.086885 |
| 7  | H | -6.510993 | -1.775148 | -0.301140 |
| 8  | H | -6.506463 | 0.709249  | -0.471072 |
| 9  | H | -4.339817 | 1.951715  | -0.362508 |
| 10 | H | -2.231338 | -1.763667 | 0.131109  |
| 11 | H | -4.368534 | -3.004045 | -0.010855 |
| 12 | C | -1.889163 | 0.992340  | -0.093310 |
| 13 | O | -1.925907 | 2.183859  | -0.299975 |
| 14 | C | -0.570411 | 0.261660  | 0.186051  |
| 15 | C | 0.596612  | 1.139170  | 0.248276  |
| 16 | H | 0.424641  | 2.208045  | 0.375940  |
| 17 | C | 1.891527  | 0.653397  | 0.142775  |
| 18 | C | 3.038720  | 1.534342  | 0.126221  |

|    |   |           |           |           |
|----|---|-----------|-----------|-----------|
| 19 | C | 2.206876  | -0.756079 | 0.047190  |
| 20 | C | 4.321599  | 1.071933  | -0.019915 |
| 21 | H | 2.863458  | 2.608790  | 0.221330  |
| 22 | C | 3.495031  | -1.209321 | -0.108274 |
| 23 | H | 1.399089  | -1.485434 | 0.129885  |
| 24 | C | 4.595242  | -0.316413 | -0.153744 |
| 25 | H | 5.153140  | 1.780515  | -0.036283 |
| 26 | H | 3.681390  | -2.283621 | -0.180741 |
| 27 | H | -0.453235 | -0.541792 | -0.565300 |
| 28 | F | -0.815255 | -0.462680 | 1.402959  |
| 29 | C | 5.924366  | -0.793572 | -0.304172 |
| 30 | N | 7.012826  | -1.183439 | -0.429890 |

**16-IM1**

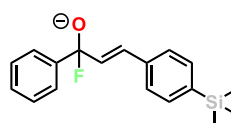

|    |    |           |           |           |
|----|----|-----------|-----------|-----------|
| 1  | C  | -5.926918 | 2.058535  | 0.718205  |
| 2  | C  | -5.640334 | 1.031374  | 1.618957  |
| 3  | C  | -4.795436 | -0.013624 | 1.240602  |
| 4  | C  | -4.224808 | -0.046147 | -0.032576 |
| 5  | C  | -4.522469 | 0.983334  | -0.933144 |
| 6  | C  | -5.367075 | 2.029984  | -0.561706 |
| 7  | H  | -6.587728 | 2.877049  | 1.009660  |
| 8  | H  | -6.080605 | 1.044787  | 2.618333  |
| 9  | H  | -4.564373 | -0.839025 | 1.915977  |
| 10 | H  | -4.097183 | 0.947394  | -1.938102 |
| 11 | H  | -5.596040 | 2.825307  | -1.274119 |
| 12 | C  | -3.271440 | -1.214978 | -0.381658 |
| 13 | O  | -3.381684 | -2.254936 | 0.340319  |
| 14 | C  | -1.853375 | -0.645444 | -0.558348 |
| 15 | C  | -0.822804 | -1.161160 | 0.118125  |
| 16 | H  | -1.067116 | -2.000910 | 0.778021  |
| 17 | C  | 0.587641  | -0.740441 | 0.070975  |
| 18 | C  | 1.532378  | -1.427074 | 0.851248  |
| 19 | C  | 1.047236  | 0.323769  | -0.722790 |
| 20 | C  | 2.877984  | -1.066712 | 0.837420  |
| 21 | H  | 1.196625  | -2.257804 | 1.476618  |
| 22 | C  | 2.393504  | 0.679708  | -0.731957 |
| 23 | H  | 0.341769  | 0.881449  | -1.341682 |
| 24 | C  | 3.343679  | -0.004406 | 0.045507  |
| 25 | H  | 3.577643  | -1.631667 | 1.461585  |
| 26 | H  | 2.708601  | 1.514040  | -1.364375 |
| 27 | H  | -1.729791 | 0.197154  | -1.248056 |
| 28 | F  | -3.630992 | -1.474153 | -1.825432 |
| 29 | Si | 5.175973  | 0.460506  | 0.047174  |
| 30 | C  | 5.453168  | 1.902629  | -1.128256 |
| 31 | H  | 4.874866  | 2.786518  | -0.819313 |
| 32 | H  | 6.517916  | 2.180617  | -1.138962 |

|    |   |          |           |           |
|----|---|----------|-----------|-----------|
| 33 | H | 5.160385 | 1.640812  | -2.156325 |
| 34 | C | 5.682592 | 0.941025  | 1.796594  |
| 35 | H | 5.498148 | 0.113831  | 2.498697  |
| 36 | H | 6.754209 | 1.189284  | 1.836574  |
| 37 | H | 5.112414 | 1.816208  | 2.142269  |
| 38 | C | 6.184305 | -1.031147 | -0.505863 |
| 39 | H | 5.914363 | -1.327417 | -1.530515 |
| 40 | H | 7.260570 | -0.801327 | -0.485086 |
| 41 | H | 6.007129 | -1.891863 | 0.156693  |

**16-TS (Frequency: 279.9668 i cm<sup>-1</sup>)**

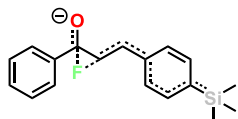

|    |    |           |           |           |
|----|----|-----------|-----------|-----------|
| 1  | C  | 6.448270  | 1.638720  | -0.646393 |
| 2  | C  | 6.516143  | 0.307705  | -1.064226 |
| 3  | C  | 5.461176  | -0.559636 | -0.790248 |
| 4  | C  | 4.325595  | -0.100894 | -0.112043 |
| 5  | C  | 4.265460  | 1.232120  | 0.313876  |
| 6  | C  | 5.326564  | 2.096485  | 0.047482  |
| 7  | H  | 7.274484  | 2.319652  | -0.858038 |
| 8  | H  | 7.393749  | -0.052151 | -1.603599 |
| 9  | H  | 5.496755  | -1.604737 | -1.101644 |
| 10 | H  | 3.399952  | 1.552784  | 0.892911  |
| 11 | H  | 5.281731  | 3.131926  | 0.388932  |
| 12 | C  | 3.205582  | -1.075109 | 0.137373  |
| 13 | O  | 3.436059  | -2.268166 | 0.133492  |
| 14 | C  | 1.824303  | -0.519490 | 0.349270  |
| 15 | C  | 0.753301  | -1.395410 | 0.228767  |
| 16 | H  | 0.956880  | -2.468060 | 0.224551  |
| 17 | C  | -0.613228 | -0.951254 | 0.164541  |
| 18 | C  | -1.660857 | -1.829928 | -0.216082 |
| 19 | C  | -0.998361 | 0.377904  | 0.477018  |
| 20 | C  | -2.975933 | -1.397708 | -0.317087 |
| 21 | H  | -1.413139 | -2.869872 | -0.446277 |
| 22 | C  | -2.318321 | 0.801491  | 0.357346  |
| 23 | H  | -0.240123 | 1.066482  | 0.855880  |
| 24 | C  | -3.350301 | -0.065239 | -0.045607 |
| 25 | H  | -3.738441 | -2.123051 | -0.622885 |
| 26 | H  | -2.553643 | 1.840739  | 0.607802  |
| 27 | H  | 1.680112  | 0.500519  | -0.022902 |
| 28 | F  | 2.212664  | 0.028001  | 1.945707  |
| 29 | Si | -5.136651 | 0.488217  | -0.207242 |
| 30 | C  | -5.285652 | 2.297923  | 0.295938  |
| 31 | H  | -4.667108 | 2.942381  | -0.347155 |
| 32 | H  | -6.330350 | 2.632785  | 0.207641  |
| 33 | H  | -4.967330 | 2.448098  | 1.338822  |
| 34 | C  | -5.711125 | 0.279987  | -1.993132 |
| 35 | H  | -5.608167 | -0.767713 | -2.315093 |

|    |   |           |           |           |
|----|---|-----------|-----------|-----------|
| 36 | H | -6.768060 | 0.567802  | -2.103423 |
| 37 | H | -5.110506 | 0.904196  | -2.671847 |
| 38 | C | -6.240695 | -0.569627 | 0.899069  |
| 39 | H | -5.959283 | -0.455682 | 1.956796  |
| 40 | H | -7.297562 | -0.281123 | 0.789903  |
| 41 | H | -6.150817 | -1.634933 | 0.636541  |

**16-IM2**

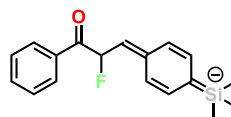

|    |    |           |           |           |
|----|----|-----------|-----------|-----------|
| 1  | C  | -6.607730 | 1.539748  | 0.462680  |
| 2  | C  | -6.687122 | 0.181828  | 0.781192  |
| 3  | C  | -5.572548 | -0.634707 | 0.615007  |
| 4  | C  | -4.367383 | -0.105387 | 0.134372  |
| 5  | C  | -4.295807 | 1.256362  | -0.188323 |
| 6  | C  | -5.413612 | 2.073477  | -0.023281 |
| 7  | H  | -7.479898 | 2.182756  | 0.592001  |
| 8  | H  | -7.620216 | -0.237531 | 1.160391  |
| 9  | H  | -5.611731 | -1.697221 | 0.858260  |
| 10 | H  | -3.372897 | 1.668517  | -0.594100 |
| 11 | H  | -5.352776 | 3.132110  | -0.279635 |
| 12 | C  | -3.193052 | -1.039159 | 0.000919  |
| 13 | O  | -3.344270 | -2.226304 | 0.189578  |
| 14 | C  | -1.837839 | -0.434493 | -0.369205 |
| 15 | C  | -0.729368 | -1.353219 | -0.310007 |
| 16 | H  | -0.946632 | -2.421580 | -0.338396 |
| 17 | C  | 0.607945  | -0.919068 | -0.226040 |
| 18 | C  | 1.692507  | -1.841102 | -0.040383 |
| 19 | C  | 1.005473  | 0.456112  | -0.317873 |
| 20 | C  | 3.005133  | -1.424801 | 0.081587  |
| 21 | H  | 1.457671  | -2.908261 | 0.016785  |
| 22 | C  | 2.328431  | 0.851515  | -0.178283 |
| 23 | H  | 0.247700  | 1.212306  | -0.536443 |
| 24 | C  | 3.383562  | -0.061064 | 0.028458  |
| 25 | H  | 3.775952  | -2.191519 | 0.227789  |
| 26 | H  | 2.553903  | 1.921017  | -0.254838 |
| 27 | H  | -1.668766 | 0.488782  | 0.213049  |
| 28 | F  | -2.124192 | 0.128180  | -1.712146 |
| 29 | Si | 5.164292  | 0.464185  | 0.202572  |
| 30 | C  | 5.305481  | 2.333722  | -0.012704 |
| 31 | H  | 4.717368  | 2.867946  | 0.749227  |
| 32 | H  | 6.354766  | 2.651951  | 0.084111  |
| 33 | H  | 4.944671  | 2.648252  | -1.003985 |
| 34 | C  | 5.840747  | -0.009477 | 1.904019  |
| 35 | H  | 5.752371  | -1.094762 | 2.068009  |
| 36 | H  | 6.903275  | 0.263322  | 2.000586  |
| 37 | H  | 5.279740  | 0.499167  | 2.702816  |
| 38 | C  | 6.242526  | -0.389840 | -1.094920 |

|    |   |          |           |           |
|----|---|----------|-----------|-----------|
| 39 | H | 5.926549 | -0.110275 | -2.111483 |
| 40 | H | 7.301983 | -0.114789 | -0.974427 |
| 41 | H | 6.164697 | -1.484645 | -1.006310 |

**17-IM1**

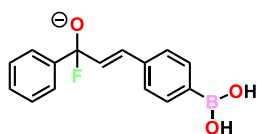

|    |   |           |           |           |
|----|---|-----------|-----------|-----------|
| 1  | C | -4.654421 | 2.037919  | -0.277979 |
| 2  | C | -3.790129 | 1.069394  | -0.789514 |
| 3  | C | -3.472562 | -0.069454 | -0.040164 |
| 4  | C | -4.042331 | -0.225405 | 1.224172  |
| 5  | C | -4.906790 | 0.740737  | 1.742381  |
| 6  | C | -5.213723 | 1.877424  | 0.992398  |
| 7  | H | -4.899064 | 2.920030  | -0.873409 |
| 8  | H | -3.364453 | 1.181734  | -1.788559 |
| 9  | H | -3.794365 | -1.132457 | 1.778127  |
| 10 | H | -5.346477 | 0.606978  | 2.733100  |
| 11 | H | -5.889765 | 2.634776  | 1.393581  |
| 12 | C | -2.496906 | -1.159374 | -0.546702 |
| 13 | O | -2.584643 | -2.291030 | 0.025051  |
| 14 | C | -1.092148 | -0.539571 | -0.641296 |
| 15 | C | -0.050444 | -1.109594 | -0.028004 |
| 16 | H | -0.988423 | 0.388869  | -1.214095 |
| 17 | H | -0.273612 | -2.030557 | 0.521755  |
| 18 | C | 1.346598  | -0.645046 | -0.009190 |
| 19 | C | 2.292369  | -1.356563 | 0.747263  |
| 20 | C | 1.788650  | 0.487309  | -0.717563 |
| 21 | C | 3.624372  | -0.952368 | 0.797948  |
| 22 | H | 1.966862  | -2.239512 | 1.302351  |
| 23 | C | 3.119627  | 0.884964  | -0.663421 |
| 24 | H | 1.079834  | 1.059198  | -1.319168 |
| 25 | C | 4.067682  | 0.176522  | 0.094584  |
| 26 | H | 4.339254  | -1.523177 | 1.395143  |
| 27 | H | 3.439474  | 1.767124  | -1.223054 |
| 28 | O | 6.432513  | -0.102104 | 0.911683  |
| 29 | O | 5.931661  | 1.733651  | -0.568130 |
| 30 | B | 5.570186  | 0.630980  | 0.149601  |
| 31 | H | 6.862861  | 1.977452  | -0.510025 |
| 32 | H | 7.345001  | 0.209621  | 0.918443  |
| 33 | F | -2.853709 | -1.222276 | -2.013389 |

**17-TS (Frequency: 294.0330 i cm<sup>-1</sup>)**

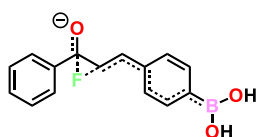

|   |   |          |          |           |
|---|---|----------|----------|-----------|
| 1 | C | 5.793506 | 0.128383 | -1.054046 |
|---|---|----------|----------|-----------|

|    |   |           |           |           |
|----|---|-----------|-----------|-----------|
| 2  | C | 4.704088  | -0.682302 | -0.743402 |
| 3  | C | 3.584857  | -0.145739 | -0.095927 |
| 4  | C | 3.574588  | 1.208420  | 0.261727  |
| 5  | C | 4.670041  | 2.015999  | -0.041225 |
| 6  | C | 5.776087  | 1.480343  | -0.703965 |
| 7  | H | 6.658633  | -0.292316 | -1.569009 |
| 8  | H | 4.700405  | -1.742397 | -1.001885 |
| 9  | H | 2.719323  | 1.587707  | 0.820336  |
| 10 | H | 4.664885  | 3.068279  | 0.247690  |
| 11 | H | 6.629508  | 2.116896  | -0.943958 |
| 12 | C | 2.427091  | -1.062019 | 0.195886  |
| 13 | O | 2.613950  | -2.260295 | 0.270841  |
| 14 | C | 1.063591  | -0.448667 | 0.342713  |
| 15 | C | -0.035605 | -1.288969 | 0.268205  |
| 16 | H | 0.962150  | 0.557616  | -0.075185 |
| 17 | H | 0.130355  | -2.366296 | 0.335682  |
| 18 | C | -1.386361 | -0.806774 | 0.157112  |
| 19 | C | -2.455504 | -1.679877 | -0.172235 |
| 20 | C | -1.729118 | 0.554907  | 0.370936  |
| 21 | C | -3.754701 | -1.216322 | -0.318144 |
| 22 | H | -2.235224 | -2.739844 | -0.325351 |
| 23 | C | -3.031793 | 1.006783  | 0.209363  |
| 24 | H | -0.950621 | 1.243586  | 0.705430  |
| 25 | C | -4.084766 | 0.141918  | -0.143377 |
| 26 | H | -4.547311 | -1.922703 | -0.580519 |
| 27 | H | -3.252669 | 2.064288  | 0.380254  |
| 28 | F | 1.476871  | 0.181012  | 1.933291  |
| 29 | O | -6.519680 | -0.243085 | -0.657915 |
| 30 | O | -5.796733 | 1.989734  | -0.117200 |
| 31 | B | -5.545435 | 0.657319  | -0.314703 |
| 32 | H | -6.716344 | 2.253797  | -0.234538 |
| 33 | H | -7.404051 | 0.128344  | -0.752573 |

**17-IM2**

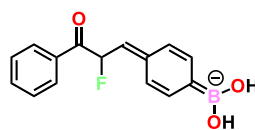

|    |   |          |           |           |
|----|---|----------|-----------|-----------|
| 1  | C | 5.984570 | -0.009591 | 0.673782  |
| 2  | C | 4.828705 | 0.749862  | 0.520674  |
| 3  | C | 3.627064 | 0.146532  | 0.125931  |
| 4  | C | 3.600161 | -1.232519 | -0.121674 |
| 5  | C | 4.758599 | -1.993047 | 0.033153  |
| 6  | C | 5.949606 | -1.384976 | 0.431408  |
| 7  | H | 6.915147 | 0.468053  | 0.983873  |
| 8  | H | 4.832418 | 1.824298  | 0.708053  |
| 9  | H | 2.679039 | -1.706440 | -0.458315 |
| 10 | H | 4.731717 | -3.065967 | -0.162172 |
| 11 | H | 6.853919 | -1.983744 | 0.551978  |

|    |   |           |           |           |
|----|---|-----------|-----------|-----------|
| 12 | C | 2.407772  | 1.022469  | 0.009220  |
| 13 | O | 2.502265  | 2.215435  | 0.194604  |
| 14 | C | 1.075568  | 0.353427  | -0.340823 |
| 15 | C | -0.066323 | 1.241685  | -0.320476 |
| 16 | H | 0.936222  | -0.540360 | 0.293498  |
| 17 | H | 0.121196  | 2.313671  | -0.392288 |
| 18 | C | -1.384668 | 0.777105  | -0.206283 |
| 19 | C | -2.496172 | 1.680575  | -0.069769 |
| 20 | C | -1.743515 | -0.616645 | -0.215596 |
| 21 | C | -3.792941 | 1.235583  | 0.083546  |
| 22 | H | -2.288185 | 2.754773  | -0.076830 |
| 23 | C | -3.050901 | -1.036148 | -0.049350 |
| 24 | H | -0.963016 | -1.361474 | -0.388936 |
| 25 | C | -4.132140 | -0.139908 | 0.110264  |
| 26 | H | -4.593755 | 1.974510  | 0.190598  |
| 27 | H | -3.260973 | -2.110782 | -0.060499 |
| 28 | O | -6.589887 | 0.305087  | 0.439654  |
| 29 | O | -5.848165 | -1.978904 | 0.278304  |
| 30 | B | -5.586468 | -0.626094 | 0.283103  |
| 31 | H | -6.777974 | -2.207980 | 0.384635  |
| 32 | H | -7.470977 | -0.068887 | 0.548785  |
| 33 | F | 1.367951  | -0.250953 | -1.646938 |

#### 18-IM1

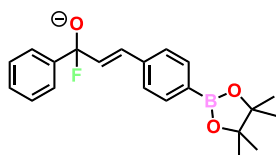

|    |   |           |           |           |
|----|---|-----------|-----------|-----------|
| 1  | C | -6.507118 | 2.257483  | -0.307920 |
| 2  | C | -5.723887 | 1.212289  | -0.798797 |
| 3  | C | -5.493816 | 0.069627  | -0.023632 |
| 4  | C | -6.069095 | -0.011572 | 1.245196  |
| 5  | C | -6.852954 | 1.031227  | 1.742599  |
| 6  | C | -7.072429 | 2.170874  | 0.966943  |
| 7  | H | -6.683891 | 3.142211  | -0.923134 |
| 8  | H | -5.294707 | 1.267813  | -1.801154 |
| 9  | H | -5.890277 | -0.921823 | 1.819940  |
| 10 | H | -7.297780 | 0.955443  | 2.737131  |
| 11 | H | -7.685265 | 2.988138  | 1.351776  |
| 12 | C | -4.610015 | -1.105497 | -0.507799 |
| 13 | O | -4.784777 | -2.214868 | 0.087039  |
| 14 | C | -3.160159 | -0.604456 | -0.619807 |
| 15 | C | -2.166113 | -1.250953 | -0.003276 |
| 16 | H | -2.983152 | 0.300536  | -1.211641 |
| 17 | H | -2.463183 | -2.139272 | 0.564806  |
| 18 | C | -0.733965 | -0.910691 | -0.009829 |
| 19 | C | 0.157943  | -1.699524 | 0.736041  |
| 20 | C | -0.207335 | 0.173087  | -0.736924 |
| 21 | C | 1.521670  | -1.419032 | 0.755956  |

|    |   |           |           |           |
|----|---|-----------|-----------|-----------|
| 22 | H | -0.235222 | -2.545277 | 1.304761  |
| 23 | C | 1.154174  | 0.449765  | -0.713203 |
| 24 | H | -0.874161 | 0.802239  | -1.328954 |
| 25 | C | 2.047438  | -0.339372 | 0.031890  |
| 26 | H | 2.195205  | -2.048917 | 1.341942  |
| 27 | H | 1.541436  | 1.295861  | -1.285904 |
| 28 | C | 5.797828  | -0.314612 | 0.372613  |
| 29 | C | 5.518874  | 1.094251  | -0.256490 |
| 30 | O | 4.480414  | -0.718327 | 0.804862  |
| 31 | O | 4.151894  | 0.960545  | -0.701976 |
| 32 | C | 6.262438  | -1.338491 | -0.659182 |
| 33 | H | 7.287406  | -1.130728 | -0.994933 |
| 34 | H | 6.239387  | -2.336942 | -0.201506 |
| 35 | H | 5.598457  | -1.343826 | -1.535657 |
| 36 | C | 6.734951  | -0.300091 | 1.567345  |
| 37 | H | 6.878155  | -1.325910 | 1.934066  |
| 38 | H | 7.716801  | 0.102107  | 1.278258  |
| 39 | H | 6.330196  | 0.306596  | 2.386372  |
| 40 | C | 6.400214  | 1.443614  | -1.442737 |
| 41 | H | 6.140618  | 2.446048  | -1.810278 |
| 42 | H | 7.458531  | 1.449877  | -1.144012 |
| 43 | H | 6.267645  | 0.729066  | -2.264076 |
| 44 | C | 5.543986  | 2.216513  | 0.777253  |
| 45 | H | 6.566936  | 2.419656  | 1.121887  |
| 46 | H | 5.141668  | 3.129329  | 0.317043  |
| 47 | H | 4.921659  | 1.964441  | 1.648029  |
| 48 | B | 3.572772  | -0.028973 | 0.046239  |
| 49 | F | -4.975151 | -1.169694 | -1.972534 |

#### 18-TS (Frequency: 304.8923 i cm<sup>-1</sup>)

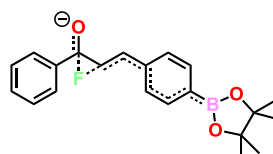

|    |   |           |           |           |
|----|---|-----------|-----------|-----------|
| 1  | C | -7.741880 | 0.606741  | 1.089223  |
| 2  | C | -6.744923 | -0.334315 | 0.841825  |
| 3  | C | -5.591319 | 0.026744  | 0.135814  |
| 4  | C | -5.454076 | 1.335000  | -0.345253 |
| 5  | C | -6.457227 | 2.272856  | -0.104647 |
| 6  | C | -7.597069 | 1.913197  | 0.617282  |
| 7  | H | -8.633959 | 0.323432  | 1.650076  |
| 8  | H | -6.841115 | -1.361864 | 1.196037  |
| 9  | H | -4.577460 | 1.572368  | -0.947478 |
| 10 | H | -6.353563 | 3.289052  | -0.488602 |
| 11 | H | -8.377643 | 2.651648  | 0.808348  |
| 12 | C | -4.534778 | -1.022534 | -0.080068 |
| 13 | O | -4.839078 | -2.198569 | -0.049008 |
| 14 | C | -3.119692 | -0.564665 | -0.282231 |
| 15 | C | -2.108302 | -1.497774 | -0.146474 |

|    |   |           |           |           |
|----|---|-----------|-----------|-----------|
| 16 | H | -2.913003 | 0.464887  | 0.022783  |
| 17 | H | -2.380275 | -2.554553 | -0.105410 |
| 18 | C | -0.714035 | -1.144367 | -0.123257 |
| 19 | C | 0.277436  | -2.082980 | 0.263457  |
| 20 | C | -0.254999 | 0.147866  | -0.493117 |
| 21 | C | 1.619953  | -1.740372 | 0.314138  |
| 22 | H | -0.037871 | -3.093814 | 0.535060  |
| 23 | C | 1.089397  | 0.482967  | -0.423887 |
| 24 | H | -0.979910 | 0.869020  | -0.875635 |
| 25 | C | 2.066684  | -0.445590 | -0.016604 |
| 26 | H | 2.353361  | -2.491258 | 0.621464  |
| 27 | H | 1.404053  | 1.489821  | -0.712919 |
| 28 | F | -3.508892 | -0.040723 | -1.942750 |
| 29 | C | 5.819702  | -0.303781 | 0.172157  |
| 30 | C | 5.439119  | 1.214092  | 0.091088  |
| 31 | O | 4.552984  | -0.914916 | 0.485049  |
| 32 | O | 4.063363  | 1.156819  | -0.333013 |
| 33 | C | 6.271986  | -0.867457 | -1.172515 |
| 34 | H | 7.266576  | -0.493052 | -1.450728 |
| 35 | H | 6.317946  | -1.962690 | -1.098716 |
| 36 | H | 5.560305  | -0.603608 | -1.968179 |
| 37 | C | 6.825464  | -0.647820 | 1.257162  |
| 38 | H | 7.039099  | -1.725489 | 1.231771  |
| 39 | H | 7.768435  | -0.106423 | 1.092111  |
| 40 | H | 6.441032  | -0.395449 | 2.252911  |
| 41 | C | 6.243239  | 2.016015  | -0.917663 |
| 42 | H | 5.916821  | 3.065115  | -0.896965 |
| 43 | H | 7.313765  | 1.984033  | -0.667719 |
| 44 | H | 6.104886  | 1.631493  | -1.935483 |
| 45 | C | 5.461408  | 1.898032  | 1.455731  |
| 46 | H | 6.488746  | 2.035321  | 1.819745  |
| 47 | H | 4.987639  | 2.885038  | 1.363538  |
| 48 | H | 4.899485  | 1.312371  | 2.197683  |
| 49 | B | 3.563601  | -0.067340 | 0.044769  |

**18-IM2**

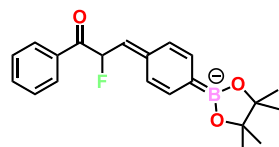

|   |   |           |           |           |
|---|---|-----------|-----------|-----------|
| 1 | C | -7.984830 | 0.423898  | 0.672433  |
| 2 | C | -6.894941 | -0.439201 | 0.614040  |
| 3 | C | -5.643352 | 0.021809  | 0.184122  |
| 4 | C | -5.497971 | 1.364493  | -0.190310 |
| 5 | C | -6.589745 | 2.229509  | -0.128069 |
| 6 | C | -7.832087 | 1.762209  | 0.302059  |
| 7 | H | -8.955524 | 0.056333  | 1.008396  |
| 8 | H | -6.990155 | -1.486328 | 0.903783  |
| 9 | H | -4.537065 | 1.729346  | -0.550448 |

|    |   |           |           |           |
|----|---|-----------|-----------|-----------|
| 10 | H | -6.470316 | 3.273454  | -0.421169 |
| 11 | H | -8.684358 | 2.442163  | 0.347924  |
| 12 | C | -4.501081 | -0.958744 | 0.175473  |
| 13 | O | -4.680464 | -2.100396 | 0.535853  |
| 14 | C | -3.130051 | -0.458208 | -0.290637 |
| 15 | C | -2.074876 | -1.453864 | -0.233300 |
| 16 | H | -2.877150 | 0.462310  | 0.266796  |
| 17 | H | -2.367425 | -2.503431 | -0.188045 |
| 18 | C | -0.720181 | -1.110591 | -0.215401 |
| 19 | C | 0.312950  | -2.101658 | -0.045349 |
| 20 | C | -0.238882 | 0.240885  | -0.362815 |
| 21 | C | 1.647681  | -1.767998 | 0.020834  |
| 22 | H | 0.009249  | -3.148581 | 0.046953  |
| 23 | C | 1.104158  | 0.550192  | -0.281048 |
| 24 | H | -0.957240 | 1.036861  | -0.572485 |
| 25 | C | 2.107048  | -0.429077 | -0.082042 |
| 26 | H | 2.384875  | -2.565550 | 0.160769  |
| 27 | H | 1.409467  | 1.596093  | -0.391699 |
| 28 | C | 5.855107  | -0.312463 | 0.037774  |
| 29 | C | 5.473370  | 1.193241  | 0.236551  |
| 30 | O | 4.601688  | -0.973031 | 0.272979  |
| 31 | O | 4.095987  | 1.209254  | -0.170038 |
| 32 | C | 6.272319  | -0.623333 | -1.398273 |
| 33 | H | 7.259002  | -0.200871 | -1.633181 |
| 34 | H | 6.319595  | -1.713925 | -1.524145 |
| 35 | H | 5.538151  | -0.224088 | -2.113130 |
| 36 | C | 6.893484  | -0.837438 | 1.015287  |
| 37 | H | 7.106601  | -1.892729 | 0.793941  |
| 38 | H | 7.831732  | -0.270786 | 0.923194  |
| 39 | H | 6.537454  | -0.767900 | 2.050523  |
| 40 | C | 6.264923  | 2.166123  | -0.621371 |
| 41 | H | 5.940222  | 3.194052  | -0.407026 |
| 42 | H | 7.339350  | 2.091408  | -0.397875 |
| 43 | H | 6.110795  | 1.971930  | -1.689928 |
| 44 | C | 5.520587  | 1.618498  | 1.702847  |
| 45 | H | 6.553634  | 1.693227  | 2.069410  |
| 46 | H | 5.042341  | 2.603062  | 1.799925  |
| 47 | H | 4.972684  | 0.904135  | 2.334447  |
| 48 | B | 3.589385  | -0.067514 | 0.004241  |
| 49 | F | -3.406924 | 0.055676  | -1.625037 |

**19-IM1**

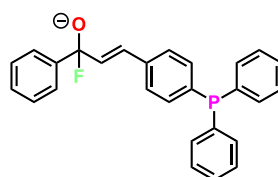

|   |   |           |          |          |
|---|---|-----------|----------|----------|
| 1 | C | -7.501796 | 2.025543 | 0.094347 |
| 2 | C | -7.380946 | 1.046584 | 1.082215 |



|    |   |           |           |           |
|----|---|-----------|-----------|-----------|
| 3  | C | -6.510858 | -0.029126 | 0.896251  |
| 4  | C | -5.751260 | -0.140314 | -0.269269 |
| 5  | C | -5.881682 | 0.841773  | -1.258116 |
| 6  | C | -6.750791 | 1.918590  | -1.079002 |
| 7  | H | -8.181939 | 2.867613  | 0.235372  |
| 8  | H | -7.970286 | 1.121897  | 1.998571  |
| 9  | H | -6.405804 | -0.818585 | 1.642262  |
| 10 | H | -5.305564 | 0.743617  | -2.180183 |
| 11 | H | -6.848899 | 2.676157  | -1.859360 |
| 12 | C | -4.784147 | -1.341576 | -0.403485 |
| 13 | O | -5.043211 | -2.346957 | 0.329025  |
| 14 | C | -3.342492 | -0.806917 | -0.357938 |
| 15 | C | -2.454206 | -1.306316 | 0.506777  |
| 16 | H | -2.824399 | -2.106946 | 1.156887  |
| 17 | C | -1.046045 | -0.910714 | 0.672632  |
| 18 | C | -0.271225 | -1.533722 | 1.664100  |
| 19 | C | -0.426484 | 0.071859  | -0.119296 |
| 20 | C | 1.063716  | -1.188900 | 1.860136  |
| 21 | H | -0.732121 | -2.296607 | 2.295429  |
| 22 | C | 0.909933  | 0.410092  | 0.066914  |
| 23 | H | -0.997091 | 0.577471  | -0.900099 |
| 24 | C | 1.678535  | -0.219554 | 1.057104  |
| 25 | H | 1.637531  | -1.684415 | 2.647936  |
| 26 | H | 1.361796  | 1.171949  | -0.571893 |
| 27 | P | 3.460733  | 0.124914  | 1.363510  |
| 28 | C | 4.272715  | -1.113806 | 0.263255  |
| 29 | C | 3.587986  | -1.911997 | -0.661051 |
| 30 | C | 5.664051  | -1.250940 | 0.378926  |
| 31 | C | 4.283821  | -2.821636 | -1.460077 |
| 32 | H | 2.504329  | -1.824039 | -0.762303 |
| 33 | C | 6.359770  | -2.149913 | -0.427538 |
| 34 | H | 6.209020  | -0.644204 | 1.107315  |
| 35 | C | 5.668986  | -2.939736 | -1.348782 |
| 36 | H | 3.738217  | -3.438531 | -2.176035 |
| 37 | H | 7.442832  | -2.240773 | -0.330588 |
| 38 | H | 6.210299  | -3.649929 | -1.975733 |
| 39 | C | 3.698349  | 1.677647  | 0.395368  |
| 40 | C | 4.176850  | 1.721131  | -0.919931 |
| 41 | C | 3.365191  | 2.880292  | 1.035952  |
| 42 | C | 4.310568  | 2.943008  | -1.582510 |
| 43 | H | 4.444134  | 0.796325  | -1.435365 |
| 44 | C | 3.487355  | 4.098738  | 0.370228  |
| 45 | H | 3.002697  | 2.861570  | 2.067338  |
| 46 | C | 3.963196  | 4.132255  | -0.941967 |
| 47 | H | 4.684719  | 2.963138  | -2.607438 |
| 48 | H | 3.218205  | 5.025325  | 0.879812  |
| 49 | H | 4.066482  | 5.085364  | -1.462913 |
| 50 | H | -3.083044 | 0.000186  | -1.052267 |
| 51 | F | -4.896777 | -1.655412 | -1.877006 |

19-TS (Frequency: 287.5810 i cm<sup>-1</sup>)

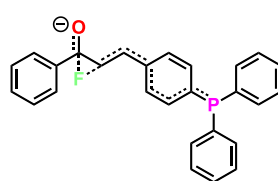

|    |   |           |           |           |
|----|---|-----------|-----------|-----------|
| 1  | C | -7.723073 | -1.780068 | 0.932312  |
| 2  | C | -8.023382 | -0.844452 | -0.060133 |
| 3  | C | -7.064727 | 0.090231  | -0.445026 |
| 4  | C | -5.796126 | 0.086967  | 0.146951  |
| 5  | C | -5.501857 | -0.846444 | 1.148920  |
| 6  | C | -6.465826 | -1.774865 | 1.539577  |
| 7  | H | -8.473251 | -2.511950 | 1.236781  |
| 8  | H | -9.006820 | -0.845041 | -0.532866 |
| 9  | H | -7.281321 | 0.833447  | -1.213945 |
| 10 | H | -4.530947 | -0.787558 | 1.639781  |
| 11 | H | -6.238202 | -2.494441 | 2.327723  |
| 12 | C | -4.790004 | 1.101741  | -0.324391 |
| 13 | O | -5.171060 | 2.127686  | -0.852385 |
| 14 | C | -3.333690 | 0.776388  | -0.160032 |
| 15 | C | -2.415923 | 1.519450  | -0.880073 |
| 16 | H | -2.755448 | 2.433266  | -1.371758 |
| 17 | C | -1.021760 | 1.170856  | -0.953537 |
| 18 | C | -0.154647 | 1.770036  | -1.900387 |
| 19 | C | -0.438433 | 0.214548  | -0.080707 |
| 20 | C | 1.181652  | 1.405463  | -1.997527 |
| 21 | H | -0.559571 | 2.522097  | -2.582150 |
| 22 | C | 0.896926  | -0.149791 | -0.185762 |
| 23 | H | -1.053677 | -0.207449 | 0.716277  |
| 24 | C | 1.738907  | 0.435959  | -1.146384 |
| 25 | H | 1.812713  | 1.880970  | -2.754255 |
| 26 | H | 1.303424  | -0.889592 | 0.509472  |
| 27 | P | 3.523022  | 0.068993  | -1.313544 |
| 28 | C | 4.281744  | 1.077526  | 0.034980  |
| 29 | C | 3.543255  | 1.851523  | 0.937374  |
| 30 | C | 5.682148  | 1.081998  | 0.127911  |
| 31 | C | 4.191460  | 2.603464  | 1.920398  |
| 32 | H | 2.453187  | 1.866120  | 0.874244  |
| 33 | C | 6.328427  | 1.821374  | 1.116510  |
| 34 | H | 6.273175  | 0.494432  | -0.580459 |
| 35 | C | 5.582394  | 2.586849  | 2.015837  |
| 36 | H | 3.602940  | 3.202799  | 2.617209  |
| 37 | H | 7.417766  | 1.807571  | 1.180656  |
| 38 | H | 6.086452  | 3.172714  | 2.786078  |
| 39 | C | 3.612023  | -1.624565 | -0.579030 |
| 40 | C | 4.000671  | -1.898761 | 0.737917  |
| 41 | C | 3.256980  | -2.694829 | -1.414161 |
| 42 | C | 4.027129  | -3.213430 | 1.209565  |

|    |   |           |           |           |
|----|---|-----------|-----------|-----------|
| 43 | H | 4.281186  | -1.081855 | 1.405905  |
| 44 | C | 3.273033  | -4.005441 | -0.941068 |
| 45 | H | 2.960827  | -2.497168 | -2.448086 |
| 46 | C | 3.661594  | -4.268341 | 0.374361  |
| 47 | H | 4.331308  | -3.411297 | 2.238848  |
| 48 | H | 2.989017  | -4.825210 | -1.603054 |
| 49 | H | 3.681555  | -5.294151 | 0.745613  |
| 50 | H | -3.108712 | -0.278957 | 0.018686  |
| 51 | F | -3.426201 | 1.099394  | 1.585018  |

### 19-IM2

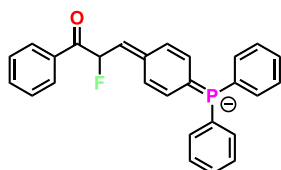

|    |   |           |           |           |
|----|---|-----------|-----------|-----------|
| 1  | C | 7.824824  | 1.299947  | 1.631792  |
| 2  | C | 8.163589  | 0.631342  | 0.452856  |
| 3  | C | 7.174611  | -0.005521 | -0.290463 |
| 4  | C | 5.839227  | 0.016375  | 0.133926  |
| 5  | C | 5.506960  | 0.684663  | 1.320002  |
| 6  | C | 6.498080  | 1.324946  | 2.062852  |
| 7  | H | 8.597707  | 1.801758  | 2.216319  |
| 8  | H | 9.200513  | 0.609812  | 0.114454  |
| 9  | H | 7.415910  | -0.529047 | -1.216327 |
| 10 | H | 4.477113  | 0.686380  | 1.674169  |
| 11 | H | 6.232969  | 1.842958  | 2.985553  |
| 12 | C | 4.816872  | -0.667167 | -0.734398 |
| 13 | O | 5.163379  | -1.222981 | -1.752600 |
| 14 | C | 3.352294  | -0.625274 | -0.286459 |
| 15 | C | 2.425155  | -1.250383 | -1.209051 |
| 16 | H | 2.829491  | -1.939614 | -1.950739 |
| 17 | C | 1.049697  | -0.993255 | -1.180363 |
| 18 | C | 0.152204  | -1.527495 | -2.169415 |
| 19 | C | 0.415918  | -0.178958 | -0.173989 |
| 20 | C | -1.198632 | -1.242244 | -2.172719 |
| 21 | H | 0.568630  | -2.164917 | -2.954366 |
| 22 | C | -0.936985 | 0.100308  | -0.197354 |
| 23 | H | 1.019752  | 0.208236  | 0.649856  |
| 24 | C | -1.794838 | -0.417137 | -1.192500 |
| 25 | H | -1.828290 | -1.667629 | -2.961315 |
| 26 | H | -1.358300 | 0.728878  | 0.594368  |
| 27 | P | -3.584499 | -0.148145 | -1.241415 |
| 28 | C | -4.249265 | -1.155009 | 0.161774  |
| 29 | C | -3.442384 | -1.933341 | 0.999241  |
| 30 | C | -5.639392 | -1.175923 | 0.356302  |
| 31 | C | -4.010679 | -2.702674 | 2.018162  |
| 32 | H | -2.359999 | -1.934736 | 0.853227  |
| 33 | C | -6.206676 | -1.932996 | 1.379400  |

|    |   |           |           |           |
|----|---|-----------|-----------|-----------|
| 34 | H | -6.285390 | -0.585647 | -0.300335 |
| 35 | C | -5.391103 | -2.701268 | 2.214224  |
| 36 | H | -3.368200 | -3.304527 | 2.663541  |
| 37 | H | -7.288822 | -1.931009 | 1.521795  |
| 38 | H | -5.833063 | -3.300853 | 3.011667  |
| 39 | C | -3.722559 | 1.556207  | -0.529758 |
| 40 | C | -4.088539 | 1.844061  | 0.790867  |
| 41 | C | -3.426978 | 2.625124  | -1.390582 |
| 42 | C | -4.152443 | 3.166069  | 1.239645  |
| 43 | H | -4.322134 | 1.031441  | 1.481643  |
| 44 | C | -3.481982 | 3.943047  | -0.942508 |
| 45 | H | -3.144305 | 2.418062  | -2.426585 |
| 46 | C | -3.848307 | 4.218129  | 0.377365  |
| 47 | H | -4.437215 | 3.371480  | 2.273174  |
| 48 | H | -3.244799 | 4.759609  | -1.626772 |
| 49 | H | -3.897613 | 5.249547  | 0.730014  |
| 50 | H | 3.078442  | 0.417651  | -0.042443 |
| 51 | F | 3.404005  | -1.241250 | 1.037560  |

### 20-IM1

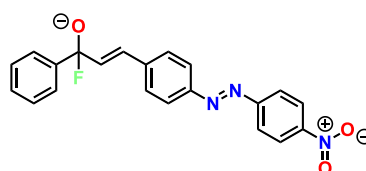

|    |   |           |           |           |
|----|---|-----------|-----------|-----------|
| 1  | C | 7.905936  | 2.199764  | -1.252430 |
| 2  | C | 7.615257  | 1.033475  | -1.962487 |
| 3  | C | 6.867911  | 0.018769  | -1.362249 |
| 4  | C | 6.399768  | 0.154713  | -0.054258 |
| 5  | C | 6.699570  | 1.324216  | 0.653784  |
| 6  | C | 7.447746  | 2.341349  | 0.059768  |
| 7  | H | 8.491128  | 2.995078  | -1.717779 |
| 8  | H | 7.976217  | 0.914749  | -2.986319 |
| 9  | H | 6.638022  | -0.910631 | -1.885981 |
| 10 | H | 6.353516  | 1.422297  | 1.684378  |
| 11 | H | 7.680731  | 3.247244  | 0.623250  |
| 12 | C | 5.549013  | -0.992146 | 0.543492  |
| 13 | O | 5.702038  | -2.134809 | 0.009793  |
| 14 | C | 4.102914  | -0.485544 | 0.684152  |
| 15 | C | 3.086503  | -1.174048 | 0.153876  |
| 16 | H | 3.361901  | -2.104260 | -0.354604 |
| 17 | C | 1.659698  | -0.827119 | 0.190977  |
| 18 | C | 0.728156  | -1.712185 | -0.389998 |
| 19 | C | 1.173145  | 0.353983  | 0.780268  |
| 20 | C | -0.631498 | -1.441925 | -0.385404 |
| 21 | H | 1.095234  | -2.630952 | -0.851977 |
| 22 | C | -0.186000 | 0.633460  | 0.788703  |
| 23 | H | 1.867716  | 1.061482  | 1.234508  |
| 24 | C | -1.097665 | -0.258937 | 0.208909  |

|    |   |           |           |           |
|----|---|-----------|-----------|-----------|
| 25 | H | -1.346897 | -2.129583 | -0.835169 |
| 26 | H | -0.572401 | 1.547124  | 1.242657  |
| 27 | H | 3.949078  | 0.457934  | 1.219592  |
| 28 | F | 5.972514  | -0.966096 | 1.990551  |
| 29 | N | -2.455950 | 0.118174  | 0.270616  |
| 30 | N | -3.263362 | -0.675190 | -0.237679 |
| 31 | C | -4.622471 | -0.271632 | -0.163651 |
| 32 | C | -5.548959 | -1.158791 | -0.722565 |
| 33 | C | -5.051323 | 0.930386  | 0.421796  |
| 34 | C | -6.906486 | -0.859151 | -0.703467 |
| 35 | H | -5.182345 | -2.082928 | -1.169398 |
| 36 | C | -6.403090 | 1.239077  | 0.446001  |
| 37 | H | -4.313019 | 1.606088  | 0.850150  |
| 38 | C | -7.305239 | 0.337152  | -0.117751 |
| 39 | H | -7.648649 | -1.530823 | -1.130531 |
| 40 | H | -6.769556 | 2.162086  | 0.891657  |
| 41 | N | -8.740367 | 0.666235  | -0.091545 |
| 42 | O | -9.508842 | -0.124133 | -0.587332 |
| 43 | O | -9.069804 | 1.708473  | 0.424548  |

**20-TS (Frequency: 295.0557 i cm<sup>-1</sup>)**

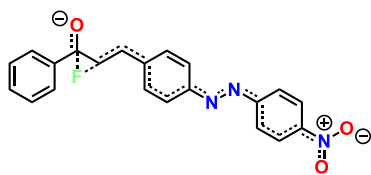

|    |   |           |           |           |
|----|---|-----------|-----------|-----------|
| 1  | C | 8.497509  | 1.962721  | -0.857957 |
| 2  | C | 8.622877  | 0.628419  | -1.249692 |
| 3  | C | 7.634670  | -0.291639 | -0.904489 |
| 4  | C | 6.510173  | 0.118953  | -0.179691 |
| 5  | C | 6.392252  | 1.455509  | 0.222008  |
| 6  | C | 7.386535  | 2.371889  | -0.116907 |
| 7  | H | 9.270987  | 2.684611  | -1.125836 |
| 8  | H | 9.492570  | 0.306231  | -1.824568 |
| 9  | H | 7.717096  | -1.339745 | -1.196706 |
| 10 | H | 5.541478  | 1.722599  | 0.848599  |
| 11 | H | 7.300245  | 3.410776  | 0.206034  |
| 12 | C | 5.458125  | -0.908864 | 0.133049  |
| 13 | O | 5.762429  | -2.082228 | 0.221845  |
| 14 | C | 4.039320  | -0.450691 | 0.238777  |
| 15 | C | 3.031492  | -1.377020 | 0.204768  |
| 16 | H | 3.300858  | -2.435454 | 0.224496  |
| 17 | C | 1.635290  | -1.026580 | 0.202565  |
| 18 | C | 0.644677  | -1.999064 | -0.103709 |
| 19 | C | 1.188278  | 0.280736  | 0.519422  |
| 20 | C | -0.698278 | -1.683987 | -0.133178 |
| 21 | H | 0.966972  | -3.017892 | -0.329987 |
| 22 | C | -0.156929 | 0.601951  | 0.481672  |
| 23 | H | 1.920085  | 1.024247  | 0.837240  |

|    |   |           |           |           |
|----|---|-----------|-----------|-----------|
| 24 | C | -1.120238 | -0.367757 | 0.152648  |
| 25 | H | -1.448247 | -2.436167 | -0.376930 |
| 26 | H | -0.503413 | 1.607671  | 0.726769  |
| 27 | H | 3.835134  | 0.581336  | -0.046893 |
| 28 | F | 4.552095  | 0.195433  | 1.979201  |
| 29 | N | -2.450458 | 0.054398  | 0.152142  |
| 30 | N | -3.310562 | -0.807385 | -0.122059 |
| 31 | C | -4.642484 | -0.333340 | -0.117572 |
| 32 | C | -5.634482 | -1.295736 | -0.349903 |
| 33 | C | -5.000606 | 1.009649  | 0.095432  |
| 34 | C | -6.976145 | -0.935817 | -0.366276 |
| 35 | H | -5.327309 | -2.328554 | -0.514674 |
| 36 | C | -6.336393 | 1.380098  | 0.078395  |
| 37 | H | -4.216891 | 1.744467  | 0.270600  |
| 38 | C | -7.302154 | 0.399783  | -0.151274 |
| 39 | H | -7.763625 | -1.666202 | -0.542024 |
| 40 | H | -6.643450 | 2.412130  | 0.238696  |
| 41 | N | -8.717783 | 0.793162  | -0.168574 |
| 42 | O | -9.542426 | -0.070930 | -0.359704 |
| 43 | O | -8.982588 | 1.959977  | 0.009518  |

**20-IM2**

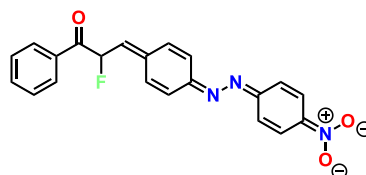

|    |   |           |           |           |
|----|---|-----------|-----------|-----------|
| 1  | C | 8.908356  | 1.655393  | 0.011455  |
| 2  | C | 9.024701  | 0.263132  | 0.010051  |
| 3  | C | 7.881791  | -0.526465 | -0.061656 |
| 4  | C | 6.613193  | 0.066343  | -0.121189 |
| 5  | C | 6.501880  | 1.463536  | -0.116507 |
| 6  | C | 7.649203  | 2.252667  | -0.055500 |
| 7  | H | 9.803461  | 2.277124  | 0.064523  |
| 8  | H | 10.008913 | -0.204135 | 0.062420  |
| 9  | H | 7.949922  | -1.614971 | -0.074323 |
| 10 | H | 5.523130  | 1.940424  | -0.154664 |
| 11 | H | 7.558815  | 3.339555  | -0.057238 |
| 12 | C | 5.428347  | -0.842911 | -0.234458 |
| 13 | O | 5.565434  | -2.022146 | -0.463335 |
| 14 | C | 4.030088  | -0.231330 | -0.077667 |
| 15 | C | 2.955342  | -1.250925 | 0.033563  |
| 16 | H | 3.261539  | -2.292724 | 0.133494  |
| 17 | C | 1.630514  | -0.922819 | 0.019558  |
| 18 | C | 0.603187  | -1.955233 | 0.123582  |
| 19 | C | 1.147521  | 0.449181  | -0.089315 |
| 20 | C | -0.720364 | -1.665059 | 0.100849  |
| 21 | H | 0.937542  | -2.991561 | 0.216824  |
| 22 | C | -0.181403 | 0.729127  | -0.114310 |

|    |   |           |           |           |
|----|---|-----------|-----------|-----------|
| 23 | H | 1.874675  | 1.261782  | -0.127880 |
| 24 | C | -1.185402 | -0.299468 | -0.022020 |
| 25 | H | -1.472346 | -2.450056 | 0.174667  |
| 26 | H | -0.535226 | 1.759441  | -0.196313 |
| 27 | H | 3.863705  | 0.441567  | -0.939844 |
| 28 | F | 4.063947  | 0.606680  | 1.046452  |
| 29 | N | -2.459943 | 0.075741  | -0.047385 |
| 30 | N | -3.367282 | -0.854892 | 0.039389  |
| 31 | C | -4.649778 | -0.389383 | 0.012088  |
| 32 | C | -5.689820 | -1.356259 | 0.100964  |
| 33 | C | -5.030258 | 0.980990  | -0.095248 |
| 34 | C | -7.019824 | -0.992320 | 0.085106  |
| 35 | H | -5.399532 | -2.404283 | 0.183421  |
| 36 | C | -6.359805 | 1.348477  | -0.111769 |
| 37 | H | -4.246329 | 1.732093  | -0.163075 |
| 38 | C | -7.355943 | 0.365060  | -0.021682 |
| 39 | H | -7.812458 | -1.735823 | 0.153610  |
| 40 | H | -6.653788 | 2.394243  | -0.193328 |
| 41 | N | -8.743462 | 0.754619  | -0.038528 |
| 42 | O | -9.592325 | -0.114921 | 0.046101  |
| 43 | O | -9.014595 | 1.938132  | -0.136526 |

21

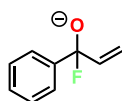

|    |   |           |           |           |
|----|---|-----------|-----------|-----------|
| 1  | C | -3.052998 | 0.078223  | -0.336568 |
| 2  | C | -2.361144 | 1.259132  | -0.062147 |
| 3  | C | -0.988842 | 1.221227  | 0.192091  |
| 4  | C | -0.290408 | 0.013186  | 0.172068  |
| 5  | C | -0.992544 | -1.167938 | -0.095340 |
| 6  | C | -2.364273 | -1.137487 | -0.349263 |
| 7  | H | -4.125997 | 0.103129  | -0.535773 |
| 8  | H | -2.895222 | 2.211634  | -0.043722 |
| 9  | H | -0.422062 | 2.124346  | 0.424369  |
| 10 | H | -0.453901 | -2.117420 | -0.086202 |
| 11 | H | -2.902210 | -2.065828 | -0.552777 |
| 12 | C | 1.236589  | 0.041272  | 0.427472  |
| 13 | O | 1.679367  | 1.068800  | 1.029895  |
| 14 | C | 1.955052  | -0.361664 | -0.872202 |
| 15 | H | 1.645664  | -1.297349 | -1.352835 |
| 16 | C | 2.907010  | 0.400922  | -1.403436 |
| 17 | H | 3.430945  | 0.137232  | -2.324910 |
| 18 | F | 1.424560  | -1.228127 | 1.231341  |
| 19 | H | 3.176164  | 1.325760  | -0.885428 |

22a

|   |   |           |           |           |
|---|---|-----------|-----------|-----------|
| 1 | C | 0.000000  | 0.000000  | 0.000000  |
| 2 | O | -0.000000 | -0.000000 | 1.156108  |
| 3 | O | 0.000000  | -0.000000 | -1.156108 |

22-TS (Frequency: 464.1381 i cm<sup>-1</sup>)

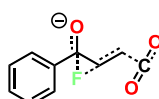

|    |   |           |           |           |
|----|---|-----------|-----------|-----------|
| 1  | C | 3.708541  | 0.672981  | 0.491745  |
| 2  | C | 3.022454  | 1.438329  | -0.453815 |
| 3  | C | 1.738289  | 1.067374  | -0.846605 |
| 4  | C | 1.125023  | -0.059589 | -0.287280 |
| 5  | C | 1.818612  | -0.828552 | 0.655371  |
| 6  | C | 3.108257  | -0.462589 | 1.039236  |
| 7  | H | 4.715394  | 0.960324  | 0.799678  |
| 8  | H | 3.491291  | 2.324717  | -0.884254 |
| 9  | H | 1.186794  | 1.648104  | -1.587833 |
| 10 | H | 1.344090  | -1.733033 | 1.035155  |
| 11 | H | 3.651215  | -1.069329 | 1.765861  |
| 12 | C | -0.275044 | -0.394995 | -0.726366 |
| 13 | O | -0.673155 | -0.012555 | -1.806772 |
| 14 | C | -1.148220 | -1.180745 | 0.223524  |
| 15 | H | -0.817174 | -1.142015 | 1.266481  |
| 16 | C | -2.517509 | -1.139673 | 0.004422  |
| 17 | H | -3.199818 | -1.565900 | 0.742739  |
| 18 | F | -0.285964 | -2.615925 | -0.148804 |
| 19 | H | -2.883803 | -1.040395 | -1.019953 |
| 20 | C | -2.836515 | 1.249732  | 0.563212  |
| 21 | O | -1.750155 | 1.632107  | 0.778545  |
| 22 | O | -3.998896 | 1.253848  | 0.433316  |

22b

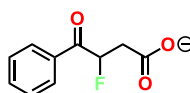

|    |   |           |           |           |
|----|---|-----------|-----------|-----------|
| 1  | C | 4.021506  | -0.095232 | -0.430797 |
| 2  | C | 3.470190  | -1.234731 | 0.161148  |
| 3  | C | 2.109749  | -1.275804 | 0.448200  |
| 4  | C | 1.288756  | -0.181377 | 0.146114  |
| 5  | C | 1.846900  | 0.959718  | -0.445271 |
| 6  | C | 3.210622  | 0.999457  | -0.732321 |
| 7  | H | 5.088386  | -0.060757 | -0.657219 |
| 8  | H | 4.104768  | -2.090126 | 0.396901  |
| 9  | H | 1.655843  | -2.154478 | 0.908292  |
| 10 | H | 1.222758  | 1.824625  | -0.670104 |
| 11 | H | 3.642150  | 1.889492  | -1.191959 |
| 12 | C | -0.172017 | -0.287477 | 0.463434  |
| 13 | O | -0.632558 | -1.285739 | 0.966280  |
| 14 | C | -1.055799 | 0.925313  | 0.154655  |
| 15 | H | -0.950230 | 1.171768  | -0.910883 |
| 16 | C | -2.504119 | 0.683621  | 0.473007  |
| 17 | H | -3.047548 | 1.637580  | 0.389186  |

|                                                                                     |   |           |           |           |                                                                                    |   |           |           |           |  |  |  |  |  |
|-------------------------------------------------------------------------------------|---|-----------|-----------|-----------|------------------------------------------------------------------------------------|---|-----------|-----------|-----------|--|--|--|--|--|
| 18                                                                                  | F | -0.541381 | 1.988429  | 0.896949  | 7                                                                                  | H | 4.148091  | -1.947270 | -0.229751 |  |  |  |  |  |
| 19                                                                                  | H | -2.624891 | 0.314660  | 1.500678  | 8                                                                                  | H | 1.686994  | -2.263642 | -0.538114 |  |  |  |  |  |
| 20                                                                                  | C | -3.132562 | -0.339276 | -0.515279 | 9                                                                                  | H | 1.026871  | 1.855515  | 0.519934  |  |  |  |  |  |
| 21                                                                                  | O | -2.462732 | -0.588808 | -1.541370 | 10                                                                                 | H | 3.457075  | 2.165224  | 0.858313  |  |  |  |  |  |
| 22                                                                                  | O | -4.244480 | -0.794689 | -0.196758 | 11                                                                                 | H | 5.025079  | 0.273733  | 0.475320  |  |  |  |  |  |
| <b>23a (24a): HCHO</b>                                                              |   |           |           |           |                                                                                    |   |           |           |           |  |  |  |  |  |
| 1                                                                                   | C | 0.526155  | 0.000031  | -0.000087 | 12                                                                                 | C | -0.260935 | -0.504090 | -0.201158 |  |  |  |  |  |
| 2                                                                                   | H | 1.116399  | 0.942584  | 0.000175  | 13                                                                                 | O | -0.669200 | -1.629368 | -0.372406 |  |  |  |  |  |
| 3                                                                                   | H | 1.116380  | -0.942720 | 0.000175  | 14                                                                                 | C | -1.224487 | 0.685530  | -0.137219 |  |  |  |  |  |
| 4                                                                                   | O | -0.673714 | -0.000006 | 0.000021  | 15                                                                                 | C | -2.654248 | 0.344782  | -0.465151 |  |  |  |  |  |
| <b>23-TS (Frequency: 299.2943 i cm<sup>-1</sup>)</b>                                |   |           |           |           |                                                                                    |   |           |           |           |  |  |  |  |  |
| 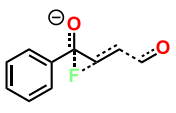   |   |           |           |           |                                                                                    |   |           |           |           |  |  |  |  |  |
| 1                                                                                   | C | 2.965350  | 1.447546  | 0.314584  | 16                                                                                 | H | -1.170651 | 1.106819  | 0.885401  |  |  |  |  |  |
| 2                                                                                   | C | 1.660399  | 1.170521  | 0.714774  | 17                                                                                 | H | -3.142615 | 1.252530  | -0.853404 |  |  |  |  |  |
| 3                                                                                   | C | 1.004764  | 0.024198  | 0.249029  | 18                                                                                 | H | -2.701347 | -0.430808 | -1.244325 |  |  |  |  |  |
| 4                                                                                   | C | 1.676630  | -0.856082 | -0.608950 | 19                                                                                 | C | -3.470926 | -0.148366 | 0.771964  |  |  |  |  |  |
| 5                                                                                   | C | 2.986248  | -0.582153 | -1.001269 | 20                                                                                 | H | -2.797464 | -0.942314 | 1.247808  |  |  |  |  |  |
| 6                                                                                   | C | 3.629386  | 0.570412  | -0.545993 | 21                                                                                 | H | -3.344782 | 0.719901  | 1.514652  |  |  |  |  |  |
| 7                                                                                   | H | 3.467546  | 2.347754  | 0.672403  | 22                                                                                 | O | -4.706885 | -0.512949 | 0.500009  |  |  |  |  |  |
| 8                                                                                   | H | 1.124440  | 1.839646  | 1.389750  | 23                                                                                 | F | -0.716497 | 1.659770  | -0.996982 |  |  |  |  |  |
| 9                                                                                   | H | 1.169886  | -1.769337 | -0.919924 | <b>24-TS (Frequency: 312.3541 i cm<sup>-1</sup>)</b>                               |   |           |           |           |  |  |  |  |  |
| 10                                                                                  | H | 3.510780  | -1.274156 | -1.662091 |  |   |           |           |           |  |  |  |  |  |
| 11                                                                                  | H | 4.652496  | 0.784501  | -0.859823 | 1                                                                                  | C | -2.862599 | -1.211987 | 0.376953  |  |  |  |  |  |
| 12                                                                                  | C | -0.415582 | -0.210000 | 0.690425  | 2                                                                                  | C | -1.529703 | -1.033967 | 0.740552  |  |  |  |  |  |
| 13                                                                                  | O | -0.836373 | 0.356466  | 1.680007  | 3                                                                                  | C | -0.815895 | 0.078345  | 0.281416  |  |  |  |  |  |
| 14                                                                                  | C | -1.291934 | -1.103166 | -0.159264 | 4                                                                                  | C | -1.452216 | 1.025781  | -0.529319 |  |  |  |  |  |
| 15                                                                                  | C | -2.668731 | -1.006632 | 0.064721  | 5                                                                                  | C | -2.790775 | 0.853426  | -0.881009 |  |  |  |  |  |
| 16                                                                                  | H | -0.986683 | -1.124352 | -1.213063 | 6                                                                                  | C | -3.494516 | -0.266795 | -0.434811 |  |  |  |  |  |
| 17                                                                                  | H | -3.358272 | -1.453941 | -0.654702 | 7                                                                                  | H | -3.412620 | -2.087488 | 0.725927  |  |  |  |  |  |
| 18                                                                                  | H | -3.023725 | -0.894981 | 1.091563  | 8                                                                                  | H | -1.015594 | -1.756688 | 1.376019  |  |  |  |  |  |
| 19                                                                                  | C | -2.850522 | 1.401881  | -0.471137 | 9                                                                                  | H | -0.889534 | 1.909300  | -0.832113 |  |  |  |  |  |
| 20                                                                                  | H | -2.826447 | 1.453670  | 0.637525  | 10                                                                                 | H | -3.289799 | 1.598706  | -1.502651 |  |  |  |  |  |
| 21                                                                                  | H | -1.834902 | 1.362853  | -0.932010 | 11                                                                                 | H | -4.539802 | -0.402755 | -0.717729 |  |  |  |  |  |
| 22                                                                                  | O | -3.843635 | 1.650005  | -1.131222 | 12                                                                                 | C | 0.624830  | 0.217784  | 0.689353  |  |  |  |  |  |
| 23                                                                                  | F | -0.514567 | -2.495842 | 0.286510  | 13                                                                                 | O | 1.005683  | -0.271840 | 1.730847  |  |  |  |  |  |
| <b>23b</b>                                                                          |   |           |           |           |                                                                                    |   |           |           |           |  |  |  |  |  |
|  |   |           |           |           |                                                                                    |   |           |           |           |  |  |  |  |  |
| 1                                                                                   | C | 3.461383  | -1.116519 | -0.061750 | 14                                                                                 | C | 1.550772  | 0.961943  | -0.243081 |  |  |  |  |  |
| 2                                                                                   | C | 2.093307  | -1.296837 | -0.238282 | 15                                                                                 | C | 2.908267  | 0.681957  | -0.119076 |  |  |  |  |  |
| 3                                                                                   | C | 1.204685  | -0.233704 | -0.029487 | 16                                                                                 | H | 1.168980  | 1.058373  | -1.266087 |  |  |  |  |  |
| 4                                                                                   | C | 1.703148  | 1.015352  | 0.364790  | 17                                                                                 | H | 3.611408  | 1.064950  | -0.862342 |  |  |  |  |  |
| 5                                                                                   | C | 3.073698  | 1.192246  | 0.548449  | 18                                                                                 | H | 3.303419  | 0.430253  | 0.867334  |  |  |  |  |  |
| 6                                                                                   | C | 3.952691  | 0.130090  | 0.333872  | 19                                                                                 | C | 2.603735  | -1.548900 | -1.063824 |  |  |  |  |  |
| <b>24b</b>                                                                          |   |           |           |           |                                                                                    |   |           |           |           |  |  |  |  |  |
|  |   |           |           |           |                                                                                    |   |           |           |           |  |  |  |  |  |
| 7                                                                                   | H | 4.148091  | -1.947270 | -0.229751 | 20                                                                                 | H | 2.431150  | -1.009676 | -2.020674 |  |  |  |  |  |
| 8                                                                                   | H | 1.686994  | -2.263642 | -0.538114 | 21                                                                                 | H | 3.677409  | -1.661181 | -0.799592 |  |  |  |  |  |
| 9                                                                                   | H | 1.026871  | 1.855515  | 0.519934  | 22                                                                                 | O | 1.728686  | -2.206445 | -0.522910 |  |  |  |  |  |
| 10                                                                                  | H | 3.457075  | 2.165224  | 0.858313  | 23                                                                                 | F | 0.958737  | 2.459663  | 0.273941  |  |  |  |  |  |
| 11                                                                                  | H | 5.025079  | 0.273733  | 0.475320  |                                                                                    |   |           |           |           |  |  |  |  |  |
| 12                                                                                  | C | -0.260935 | -0.504090 | -0.201158 |                                                                                    |   |           |           |           |  |  |  |  |  |
| 13                                                                                  | O | -0.669200 | -1.629368 | -0.372406 |                                                                                    |   |           |           |           |  |  |  |  |  |
| 14                                                                                  | C | -1.224487 | 0.685530  | -0.137219 |                                                                                    |   |           |           |           |  |  |  |  |  |
| 15                                                                                  | C | -2.654248 | 0.344782  | -0.465151 |                                                                                    |   |           |           |           |  |  |  |  |  |
| 16                                                                                  | H | -1.170651 | 1.106819  | 0.885401  |                                                                                    |   |           |           |           |  |  |  |  |  |
| 17                                                                                  | H | -3.142615 | 1.252530  | -0.853404 |                                                                                    |   |           |           |           |  |  |  |  |  |
| 18                                                                                  | H | -2.701347 | -0.430808 | -1.244325 |                                                                                    |   |           |           |           |  |  |  |  |  |
| 19                                                                                  | C | -3.470926 | -0.148366 | 0.771964  |                                                                                    |   |           |           |           |  |  |  |  |  |
| 20                                                                                  | H | -2.797464 | -0.942314 | 1.247808  |                                                                                    |   |           |           |           |  |  |  |  |  |
| 21                                                                                  | H | -3.344782 | 0.719901  | 1.514652  |                                                                                    |   |           |           |           |  |  |  |  |  |
| 22                                                                                  | O | -4.706885 | -0.512949 | 0.500009  |                                                                                    |   |           |           |           |  |  |  |  |  |
| 23                                                                                  | F | -0.716497 | 1.659770  | -0.996982 |                                                                                    |   |           |           |           |  |  |  |  |  |

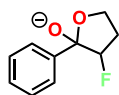

|    |   |           |           |           |
|----|---|-----------|-----------|-----------|
| 1  | C | -2.971005 | -1.175588 | -0.032890 |
| 2  | C | -1.588146 | -1.261729 | 0.125302  |
| 3  | C | -0.788819 | -0.112627 | 0.089800  |
| 4  | C | -1.408994 | 1.127290  | -0.101024 |
| 5  | C | -2.793779 | 1.218885  | -0.260540 |
| 6  | C | -3.580624 | 0.067101  | -0.227055 |
| 7  | H | -3.580283 | -2.081801 | -0.008782 |
| 8  | H | -1.102552 | -2.228591 | 0.268921  |
| 9  | H | -0.793958 | 2.030108  | -0.120104 |
| 10 | H | -3.260533 | 2.194446  | -0.412733 |
| 11 | H | -4.662632 | 0.135687  | -0.353451 |
| 12 | C | 0.713615  | -0.199010 | 0.388148  |
| 13 | O | 0.996031  | -0.214032 | 1.649559  |
| 14 | C | 1.558272  | 0.824143  | -0.431272 |
| 15 | C | 2.929198  | 0.176100  | -0.396002 |
| 16 | H | 1.176724  | 0.949418  | -1.458037 |
| 17 | H | 3.606887  | 0.511957  | -1.191667 |
| 18 | H | 3.360533  | 0.422035  | 0.583053  |
| 19 | C | 2.571330  | -1.323493 | -0.477858 |
| 20 | H | 2.874671  | -1.760639 | -1.443048 |
| 21 | H | 3.086147  | -1.891447 | 0.318049  |
| 22 | O | 1.171170  | -1.416107 | -0.360479 |
| 23 | F | 1.567899  | 2.079277  | 0.160611  |

**25a: CH<sub>3</sub>CHO**

|   |   |           |           |           |
|---|---|-----------|-----------|-----------|
| 1 | C | 0.231110  | 0.397966  | 0.000021  |
| 2 | H | 0.306483  | 1.511575  | 0.000053  |
| 3 | O | 1.229332  | -0.276152 | -0.000011 |
| 4 | C | -1.163344 | -0.149301 | 0.000014  |
| 5 | H | -1.701931 | 0.226727  | 0.882484  |
| 6 | H | -1.700799 | 0.224266  | -0.884210 |
| 7 | H | -1.145001 | -1.245340 | 0.001548  |

**25-TS (Frequency: 303.6057 i cm<sup>-1</sup>)**

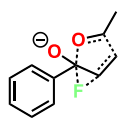

|   |   |           |           |           |
|---|---|-----------|-----------|-----------|
| 1 | C | -3.027135 | -1.443888 | 0.489081  |
| 2 | C | -1.743806 | -1.060069 | 0.870153  |
| 3 | C | -1.143467 | 0.069276  | 0.301518  |
| 4 | C | -1.851013 | 0.826372  | -0.639819 |
| 5 | C | -3.141054 | 0.448349  | -1.012226 |
| 6 | C | -3.727876 | -0.688651 | -0.454513 |
| 7 | H | -3.484830 | -2.332672 | 0.926638  |
| 8 | H | -1.179381 | -1.633337 | 1.607243  |
| 9 | H | -1.390632 | 1.730043  | -1.038590 |

|    |   |           |           |           |
|----|---|-----------|-----------|-----------|
| 10 | H | -3.693356 | 1.046417  | -1.738991 |
| 11 | H | -4.734590 | -0.985949 | -0.753313 |
| 12 | C | 0.253024  | 0.425492  | 0.737750  |
| 13 | O | 0.662726  | 0.031529  | 1.808586  |
| 14 | C | 1.092518  | 1.288991  | -0.186811 |
| 15 | C | 2.475186  | 1.259773  | 0.040287  |
| 16 | H | 0.791654  | 1.189740  | -1.238942 |
| 17 | H | 3.140523  | 1.748491  | -0.676576 |
| 18 | H | 2.828148  | 1.182197  | 1.071797  |
| 19 | C | 2.549504  | -1.038005 | -0.939732 |
| 20 | H | 2.737338  | -0.447685 | -1.864156 |
| 21 | O | 1.482911  | -1.619692 | -0.782092 |
| 22 | F | 0.266379  | 2.648447  | 0.132363  |
| 23 | C | 3.788543  | -1.421703 | -0.165568 |
| 24 | H | 4.184460  | -2.356959 | -0.598843 |
| 25 | H | 4.562039  | -0.647386 | -0.223213 |
| 26 | H | 3.529581  | -1.619242 | 0.883005  |

**25b**

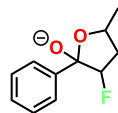

|    |   |           |           |           |
|----|---|-----------|-----------|-----------|
| 1  | C | -2.940725 | -1.074378 | -0.980389 |
| 2  | C | -1.563836 | -0.904761 | -0.831586 |
| 3  | C | -1.050165 | -0.068586 | 0.167368  |
| 4  | C | -1.942511 | 0.585214  | 1.017832  |
| 5  | C | -3.321999 | 0.422811  | 0.873502  |
| 6  | C | -3.825837 | -0.407741 | -0.128448 |
| 7  | H | -3.328193 | -1.732523 | -1.761076 |
| 8  | H | -0.868657 | -1.434539 | -1.486335 |
| 9  | H | -1.508237 | 1.215255  | 1.795370  |
| 10 | H | -4.008238 | 0.942921  | 1.545581  |
| 11 | H | -4.903345 | -0.539013 | -0.244805 |
| 12 | C | 0.459957  | 0.192280  | 0.353487  |
| 13 | O | 0.789175  | 0.765429  | 1.465412  |
| 14 | C | 1.074862  | 0.897680  | -0.899279 |
| 15 | C | 2.532338  | 0.514710  | -0.759583 |
| 16 | H | 0.634005  | 0.532931  | -1.842322 |
| 17 | H | 3.127345  | 0.630106  | -1.675568 |
| 18 | H | 2.947395  | 1.150708  | 0.035291  |
| 19 | C | 2.430623  | -0.948635 | -0.279886 |
| 20 | H | 2.627147  | -1.626925 | -1.130785 |
| 21 | O | 1.087446  | -1.146599 | 0.124074  |
| 22 | F | 0.879841  | 2.265677  | -0.853126 |
| 23 | C | 3.393404  | -1.277398 | 0.851913  |
| 24 | H | 3.272277  | -2.323039 | 1.170264  |
| 25 | H | 4.439721  | -1.124406 | 0.545846  |
| 26 | H | 3.160591  | -0.620386 | 1.701204  |

**26a: CH<sub>3</sub>COCH<sub>3</sub>**

|    |   |           |           |           |
|----|---|-----------|-----------|-----------|
| 1  | C | -0.000002 | 0.184031  | -0.000001 |
| 2  | O | -0.000023 | 1.393815  | 0.000000  |
| 3  | C | -1.283522 | -0.611343 | -0.001848 |
| 4  | H | -2.141759 | 0.062445  | -0.101994 |
| 5  | H | -1.277117 | -1.345482 | -0.820076 |
| 6  | H | -1.363276 | -1.176402 | 0.938922  |
| 7  | C | 1.283539  | -0.611312 | 0.001848  |
| 8  | H | 1.277167  | -1.345440 | 0.820087  |
| 9  | H | 1.363307  | -1.176385 | -0.938913 |
| 10 | H | 2.141767  | 0.062492  | 0.101972  |

**26-TS (Frequency: 289.1746 i cm<sup>-1</sup>)**

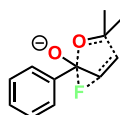

|    |   |           |           |           |
|----|---|-----------|-----------|-----------|
| 1  | C | 3.237980  | -1.450118 | -0.407284 |
| 2  | C | 1.992425  | -1.032729 | -0.868944 |
| 3  | C | 1.368751  | 0.090080  | -0.312756 |
| 4  | C | 2.016435  | 0.805882  | 0.700930  |
| 5  | C | 3.269968  | 0.394833  | 1.154981  |
| 6  | C | 3.879256  | -0.735007 | 0.607311  |
| 7  | H | 3.712582  | -2.334014 | -0.836707 |
| 8  | H | 1.474799  | -1.574021 | -1.662301 |
| 9  | H | 1.542781  | 1.702898  | 1.099159  |
| 10 | H | 3.775486  | 0.961052  | 1.939037  |
| 11 | H | 4.856565  | -1.058428 | 0.969825  |
| 12 | C | 0.012979  | 0.481137  | -0.839810 |
| 13 | O | -0.332200 | 0.098666  | -1.938075 |
| 14 | C | -0.862263 | 1.377464  | 0.024521  |
| 15 | C | -2.233398 | 1.383397  | -0.312511 |
| 16 | H | -0.666063 | 1.207004  | 1.093522  |
| 17 | H | -2.919312 | 1.920584  | 0.349113  |
| 18 | H | -2.490533 | 1.373715  | -1.375836 |
| 19 | C | -2.387565 | -0.992348 | 0.515130  |
| 20 | O | -1.247587 | -1.370822 | 0.787971  |
| 21 | F | -0.019194 | 2.692248  | -0.173637 |
| 22 | C | -3.030721 | -1.431889 | -0.785117 |
| 23 | H | -3.281121 | -2.504461 | -0.692456 |
| 24 | H | -3.944593 | -0.869954 | -1.010342 |
| 25 | H | -2.307153 | -1.310737 | -1.600729 |
| 26 | C | -3.317861 | -0.572801 | 1.638620  |
| 27 | H | -4.202748 | -0.037162 | 1.277226  |
| 28 | H | -3.643372 | -1.488249 | 2.164933  |
| 29 | H | -2.772192 | 0.051381  | 2.358700  |

**26b**

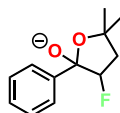

|    |   |           |           |           |
|----|---|-----------|-----------|-----------|
| 1  | C | 2.975869  | -1.522585 | 0.554991  |
| 2  | C | 1.632114  | -1.167314 | 0.432433  |
| 3  | C | 1.263030  | 0.026254  | -0.200156 |
| 4  | C | 2.265341  | 0.850991  | -0.712730 |
| 5  | C | 3.612529  | 0.504335  | -0.589796 |
| 6  | C | 3.972186  | -0.684943 | 0.045892  |
| 7  | H | 3.250178  | -2.458900 | 1.045792  |
| 8  | H | 0.848896  | -1.823953 | 0.817314  |
| 9  | H | 1.942738  | 1.764318  | -1.214617 |
| 10 | H | 4.386384  | 1.161181  | -0.993345 |
| 11 | H | 5.023882  | -0.961387 | 0.142548  |
| 12 | C | -0.202798 | 0.495366  | -0.328036 |
| 13 | O | -0.403294 | 1.444205  | -1.185949 |
| 14 | C | -0.821270 | 0.796001  | 1.076462  |
| 15 | C | -2.298449 | 0.632758  | 0.791252  |
| 16 | H | -0.462075 | 0.091787  | 1.845698  |
| 17 | H | -2.919785 | 0.469408  | 1.683266  |
| 18 | H | -2.624167 | 1.549422  | 0.281086  |
| 19 | C | -2.316184 | -0.574162 | -0.181037 |
| 20 | O | -0.964271 | -0.762480 | -0.584383 |
| 21 | F | -0.506481 | 2.072351  | 1.506720  |
| 22 | C | -3.179489 | -0.292759 | -1.409203 |
| 23 | H | -3.160001 | -1.155202 | -2.092986 |
| 24 | H | -4.224730 | -0.090127 | -1.128366 |
| 25 | H | -2.757304 | 0.580349  | -1.923286 |
| 26 | C | -2.766406 | -1.849245 | 0.525750  |
| 27 | H | -3.827544 | -1.791435 | 0.810874  |
| 28 | H | -2.628765 | -2.713413 | -0.141057 |
| 29 | H | -2.167699 | -2.015196 | 1.434334  |

**27a: C<sub>6</sub>H<sub>5</sub>CHO**

|    |   |           |           |           |
|----|---|-----------|-----------|-----------|
| 1  | C | -1.992921 | 0.469356  | 0.000031  |
| 2  | H | -2.282762 | 1.545993  | 0.000047  |
| 3  | O | -2.831323 | -0.398388 | -0.000083 |
| 4  | C | -0.531603 | 0.215403  | 0.000046  |
| 5  | C | -0.048865 | -1.099742 | 0.000036  |
| 6  | C | 0.358203  | 1.293764  | 0.000044  |
| 7  | C | 1.322141  | -1.331397 | 0.000038  |
| 8  | H | -0.765952 | -1.922431 | 0.000064  |
| 9  | C | 1.732723  | 1.059993  | -0.000037 |
| 10 | H | -0.030193 | 2.315126  | 0.000082  |
| 11 | C | 2.211311  | -0.250967 | -0.000058 |
| 12 | H | 1.705593  | -2.352560 | 0.000058  |
| 13 | H | 2.431115  | 1.897637  | -0.000064 |
| 14 | H | 3.286851  | -0.435118 | -0.000116 |

**27-TS (Frequency: 307.7336 i cm<sup>-1</sup>)**

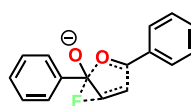

|                                                                                     |   |           |           |           |                                                                    |   |           |           |           |
|-------------------------------------------------------------------------------------|---|-----------|-----------|-----------|--------------------------------------------------------------------|---|-----------|-----------|-----------|
| 1                                                                                   | C | -3.937551 | -1.991078 | 0.118110  | 12                                                                 | C | -0.813326 | 0.289160  | 0.397966  |
| 2                                                                                   | C | -2.739391 | -1.432744 | 0.556503  | 13                                                                 | O | -0.433397 | 0.092525  | 1.619738  |
| 3                                                                                   | C | -2.450947 | -0.086972 | 0.302646  | 14                                                                 | C | -0.650603 | 1.773611  | -0.065409 |
| 4                                                                                   | C | -3.384809 | 0.703949  | -0.377049 | 15                                                                 | C | 0.850640  | 1.872413  | -0.217671 |
| 5                                                                                   | C | -4.590224 | 0.147143  | -0.804491 | 16                                                                 | H | -1.178003 | 1.972426  | -1.013714 |
| 6                                                                                   | C | -4.865371 | -1.200032 | -0.564038 | 17                                                                 | H | 1.206761  | 2.740912  | -0.787138 |
| 7                                                                                   | H | -4.151671 | -3.044316 | 0.307094  | 18                                                                 | H | 1.271407  | 1.889751  | 0.797370  |
| 8                                                                                   | H | -2.001547 | -2.030702 | 1.093642  | 19                                                                 | C | 1.169781  | 0.528436  | -0.909309 |
| 9                                                                                   | H | -3.165091 | 1.761486  | -0.522882 | 20                                                                 | H | 1.227954  | 0.693322  | -2.001679 |
| 10                                                                                  | H | -5.321107 | 0.768543  | -1.324665 | 21                                                                 | O | 0.080835  | -0.327117 | -0.639413 |
| 11                                                                                  | H | -5.806116 | -1.634742 | -0.906369 | 22                                                                 | F | -1.145573 | 2.648751  | 0.880208  |
| 12                                                                                  | C | -1.133122 | 0.458505  | 0.782805  | 23                                                                 | C | 2.486289  | -0.070653 | -0.456749 |
| 13                                                                                  | O | -0.568792 | -0.072904 | 1.715108  | 24                                                                 | C | 2.544330  | -0.748529 | 0.768195  |
| 14                                                                                  | C | -0.561800 | 1.668066  | 0.071716  | 25                                                                 | C | 3.646769  | 0.063486  | -1.221772 |
| 15                                                                                  | C | 0.807080  | 1.888672  | 0.239156  | 26                                                                 | C | 3.752733  | -1.278995 | 1.216180  |
| 16                                                                                  | H | -0.938351 | 1.781744  | -0.953254 | 27                                                                 | H | 1.614657  | -0.822643 | 1.342307  |
| 17                                                                                  | H | 1.314006  | 2.636942  | -0.374474 | 28                                                                 | C | 4.858900  | -0.466174 | -0.770780 |
| 18                                                                                  | H | 1.272492  | 1.617319  | 1.188618  | 29                                                                 | H | 3.602496  | 0.582720  | -2.182940 |
| 19                                                                                  | C | 1.282805  | -0.114432 | -1.235423 | 30                                                                 | C | 4.913728  | -1.139931 | 0.448730  |
| 20                                                                                  | H | 1.218400  | 0.678969  | -2.010208 | 31                                                                 | H | 3.794833  | -1.806428 | 2.171488  |
| 21                                                                                  | O | 0.411907  | -0.965571 | -1.120372 | 32                                                                 | H | 5.759926  | -0.357912 | -1.377491 |
| 22                                                                                  | F | -1.633506 | 2.709788  | 0.774576  | 33                                                                 | H | 5.857926  | -1.559239 | 0.800874  |
| 23                                                                                  | C | 2.639491  | -0.267384 | -0.624957 | <b>28a: C<sub>6</sub>H<sub>5</sub>COC<sub>6</sub>H<sub>5</sub></b> |   |           |           |           |
| 24                                                                                  | C | 2.891031  | -1.332978 | 0.245058  | 1                                                                  | C | -0.000058 | 1.098741  | 0.000188  |
| 25                                                                                  | C | 3.678817  | 0.605053  | -0.966536 | 2                                                                  | O | -0.000215 | 2.313103  | 0.000416  |
| 26                                                                                  | C | 4.163364  | -1.510741 | 0.786608  | 3                                                                  | C | 1.297750  | 0.347215  | 0.025924  |
| 27                                                                                  | H | 2.070368  | -2.011219 | 0.485169  | 4                                                                  | C | 2.426973  | 0.974436  | -0.517199 |
| 28                                                                                  | C | 4.951758  | 0.425075  | -0.431239 | 5                                                                  | C | 1.430112  | -0.905938 | 0.637879  |
| 29                                                                                  | H | 3.477507  | 1.433953  | -1.650521 | 6                                                                  | C | 3.667029  | 0.344416  | -0.477706 |
| 30                                                                                  | C | 5.195757  | -0.632430 | 0.450572  | 7                                                                  | H | 2.311920  | 1.959361  | -0.971832 |
| 31                                                                                  | H | 4.354842  | -2.339996 | 1.470076  | 8                                                                  | C | 2.677422  | -1.527116 | 0.693542  |
| 32                                                                                  | H | 5.758940  | 1.108829  | -0.699587 | 9                                                                  | H | 0.563442  | -1.388976 | 1.091678  |
| 33                                                                                  | H | 6.192633  | -0.773127 | 0.871658  | 10                                                                 | C | 3.792763  | -0.907857 | 0.128908  |
| <b>27b</b>                                                                          |   |           |           |           | 11                                                                 | H | 4.540004  | 0.830310  | -0.915535 |
| 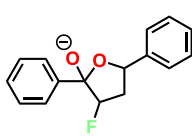 |   |           |           |           | 12                                                                 | H | 2.778171  | -2.497458 | 1.181272  |
| 1                                                                                   | C | -3.959764 | -0.885770 | -1.512156 | 13                                                                 | H | 4.765653  | -1.400418 | 0.165761  |
| 2                                                                                   | C | -2.666448 | -0.427427 | -1.259122 | 14                                                                 | C | -1.297678 | 0.347077  | -0.025993 |
| 3                                                                                   | C | -2.214879 | -0.253745 | 0.054518  | 15                                                                 | C | -1.429913 | -0.906093 | -0.637585 |
| 4                                                                                   | C | -3.080828 | -0.551860 | 1.107387  | 16                                                                 | C | -2.427195 | 0.974560  | 0.516656  |
| 5                                                                                   | C | -4.377870 | -1.006990 | 0.861689  | 17                                                                 | C | -2.677262 | -1.527498 | -0.693122 |
| 6                                                                                   | C | -4.821503 | -1.175444 | -0.450687 | 18                                                                 | H | -0.563294 | -1.389488 | -1.091157 |
| 7                                                                                   | H | -4.298215 | -1.023496 | -2.541259 | 19                                                                 | C | -3.667087 | 0.344587  | 0.477096  |
| 8                                                                                   | H | -1.985023 | -0.211818 | -2.084696 | 20                                                                 | H | -2.311970 | 1.959621  | 0.971043  |
| 9                                                                                   | H | -2.692781 | -0.420699 | 2.118306  | 21                                                                 | C | -3.792656 | -0.908112 | -0.129070 |
| 10                                                                                  | H | -5.045323 | -1.234618 | 1.695738  | 22                                                                 | H | -2.777624 | -2.498029 | -1.180554 |
| 11                                                                                  | H | -5.833656 | -1.533823 | -0.647699 | 23                                                                 | H | -4.540214 | 0.830408  | 0.914692  |
|                                                                                     |   |           |           |           | 24                                                                 | H | -4.765561 | -1.400653 | -0.165813 |
|                                                                                     |   |           |           |           | <b>28-TS (Frequency: 262.9348 i cm<sup>-1</sup>)</b>               |   |           |           |           |



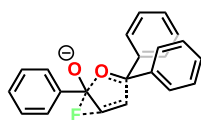

|    |   |           |           |           |
|----|---|-----------|-----------|-----------|
| 1  | C | -4.327040 | -1.523657 | -1.548279 |
| 2  | C | -3.185845 | -1.752195 | -0.784079 |
| 3  | C | -2.767319 | -0.811834 | 0.164535  |
| 4  | C | -3.516286 | 0.355679  | 0.354878  |
| 5  | C | -4.665600 | 0.579317  | -0.403488 |
| 6  | C | -5.068956 | -0.355001 | -1.358591 |
| 7  | H | -4.641155 | -2.255097 | -2.294728 |
| 8  | H | -2.591370 | -2.657679 | -0.914284 |
| 9  | H | -3.207606 | 1.060783  | 1.126401  |
| 10 | H | -5.251561 | 1.486303  | -0.245996 |
| 11 | H | -5.964599 | -0.173855 | -1.955354 |
| 12 | C | -1.510653 | -1.100130 | 0.941786  |
| 13 | O | -1.103675 | -2.240406 | 1.019711  |
| 14 | C | -0.810571 | 0.064285  | 1.624324  |
| 15 | C | 0.530045  | -0.170826 | 1.987892  |
| 16 | H | -0.973404 | 1.011918  | 1.088585  |
| 17 | H | 1.123881  | 0.662849  | 2.368336  |
| 18 | H | 0.800373  | -1.173276 | 2.329129  |
| 19 | C | 1.085104  | 0.017170  | -0.580688 |
| 20 | O | 0.112918  | -0.458653 | -1.161588 |
| 21 | F | -1.892634 | 0.259728  | 2.766300  |
| 22 | C | 2.313285  | -0.845492 | -0.422274 |
| 23 | C | 2.129747  | -2.188234 | -0.059580 |
| 24 | C | 3.592468  | -0.404828 | -0.774000 |
| 25 | C | 3.211411  | -3.059554 | -0.012064 |
| 26 | H | 1.121227  | -2.512419 | 0.206920  |
| 27 | C | 4.679962  | -1.284504 | -0.733124 |
| 28 | H | 3.747733  | 0.625259  | -1.099002 |
| 29 | C | 4.494540  | -2.608735 | -0.346718 |
| 30 | H | 3.061106  | -4.098306 | 0.287907  |
| 31 | H | 5.673321  | -0.928534 | -1.011737 |
| 32 | H | 5.343423  | -3.293611 | -0.310245 |
| 33 | C | 1.183406  | 1.511999  | -0.402708 |
| 34 | C | 2.158356  | 2.147546  | 0.380390  |
| 35 | C | 0.234018  | 2.299358  | -1.064961 |
| 36 | C | 2.186225  | 3.535050  | 0.486984  |
| 37 | H | 2.882603  | 1.546091  | 0.931497  |
| 38 | C | 0.257784  | 3.690660  | -0.956121 |
| 39 | H | -0.524141 | 1.793907  | -1.664796 |
| 40 | C | 1.236357  | 4.313126  | -0.182988 |
| 41 | H | 2.948415  | 4.015108  | 1.103004  |
| 42 | H | -0.490357 | 4.289666  | -1.478344 |
| 43 | H | 1.259265  | 5.400629  | -0.095733 |

28b

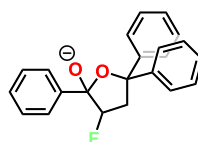

|    |   |           |           |           |
|----|---|-----------|-----------|-----------|
| 1  | C | -4.910038 | -0.924170 | -0.856305 |
| 2  | C | -3.689316 | -1.370616 | -0.344648 |
| 3  | C | -2.625021 | -0.488279 | -0.159248 |
| 4  | C | -2.799388 | 0.858307  | -0.501748 |
| 5  | C | -4.015495 | 1.311434  | -1.012778 |
| 6  | C | -5.077212 | 0.419824  | -1.190980 |
| 7  | H | -5.734374 | -1.626890 | -0.995944 |
| 8  | H | -3.519300 | -2.414465 | -0.077926 |
| 9  | H | -1.964505 | 1.552454  | -0.375858 |
| 10 | H | -4.136704 | 2.363572  | -1.278762 |
| 11 | H | -6.029248 | 0.773400  | -1.591322 |
| 12 | C | -1.314206 | -1.034504 | 0.444986  |
| 13 | O | -1.241490 | -2.320229 | 0.533531  |
| 14 | C | -0.933681 | -0.296769 | 1.768149  |
| 15 | C | 0.566999  | -0.461292 | 1.777939  |
| 16 | H | -1.229891 | 0.765832  | 1.758994  |
| 17 | H | 1.094896  | 0.134443  | 2.531065  |
| 18 | H | 0.762591  | -1.528971 | 1.941597  |
| 19 | C | 0.916030  | -0.086644 | 0.316057  |
| 20 | O | -0.240325 | -0.413306 | -0.429498 |
| 21 | F | -1.533960 | -0.889644 | 2.859674  |
| 22 | C | 2.091126  | -0.929665 | -0.202900 |
| 23 | C | 1.820903  | -2.273878 | -0.502520 |
| 24 | C | 3.390186  | -0.446360 | -0.375211 |
| 25 | C | 2.833690  | -3.113311 | -0.958249 |
| 26 | H | 0.792891  | -2.623445 | -0.357028 |
| 27 | C | 4.406832  | -1.291375 | -0.833938 |
| 28 | H | 3.622215  | 0.597471  | -0.159852 |
| 29 | C | 4.133471  | -2.624792 | -1.127127 |
| 30 | H | 2.611278  | -4.157539 | -1.187420 |
| 31 | H | 5.416216  | -0.897370 | -0.965976 |
| 32 | H | 4.926416  | -3.281957 | -1.488517 |
| 33 | C | 1.194223  | 1.413710  | 0.163536  |
| 34 | C | 1.959090  | 2.138068  | 1.086079  |
| 35 | C | 0.703365  | 2.083789  | -0.963664 |
| 36 | C | 2.217941  | 3.496430  | 0.892973  |
| 37 | H | 2.374387  | 1.642543  | 1.965586  |
| 38 | C | 0.959550  | 3.440942  | -1.159458 |
| 39 | H | 0.106185  | 1.519864  | -1.680063 |
| 40 | C | 1.716572  | 4.154681  | -0.229619 |
| 41 | H | 2.814384  | 4.041420  | 1.626708  |
| 42 | H | 0.563748  | 3.944384  | -2.043485 |
| 43 | H | 1.915243  | 5.217154  | -0.379091 |

29a

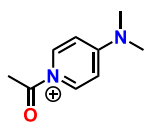

|    |   |           |           |           |
|----|---|-----------|-----------|-----------|
| 1  | C | 2.893029  | -0.166585 | 0.000227  |
| 2  | C | 3.653452  | 1.123287  | -0.000598 |
| 3  | H | 3.415771  | 1.716719  | -0.893752 |
| 4  | H | 3.415385  | 1.718264  | 0.891411  |
| 5  | H | 4.718036  | 0.873673  | -0.000138 |
| 6  | O | 3.382309  | -1.255174 | 0.001041  |
| 7  | N | 1.436325  | -0.068938 | -0.000069 |
| 8  | C | 0.777424  | 1.127179  | -0.000873 |
| 9  | C | 0.714783  | -1.230024 | 0.000571  |
| 10 | C | -0.580986 | 1.200701  | -0.000840 |
| 11 | H | 1.385983  | 2.028182  | -0.001662 |
| 12 | C | -0.644674 | -1.233519 | 0.000403  |
| 13 | H | 1.308134  | -2.142642 | 0.001359  |
| 14 | C | -1.370584 | 0.003793  | -0.000194 |
| 15 | H | -1.038394 | 2.186071  | -0.001797 |
| 16 | H | -1.154219 | -2.193273 | 0.001253  |
| 17 | N | -2.696054 | 0.039714  | -0.000121 |
| 18 | C | -3.396783 | 1.320794  | 0.002147  |
| 19 | H | -3.136647 | 1.903538  | 0.896604  |
| 20 | H | -3.143613 | 1.903214  | -0.894572 |
| 21 | H | -4.473299 | 1.134554  | 0.006553  |
| 22 | C | -3.466112 | -1.201032 | -0.001727 |
| 23 | H | -3.237644 | -1.798167 | -0.895336 |
| 24 | H | -3.246173 | -1.795608 | 0.895807  |
| 25 | H | -4.530982 | -0.956134 | -0.007422 |

29-TS (Frequency: 324.1923 i cm<sup>-1</sup>)

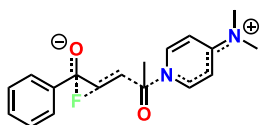

|    |   |          |           |           |
|----|---|----------|-----------|-----------|
| 1  | C | 6.017410 | 0.961054  | 1.019583  |
| 2  | C | 5.825205 | -0.059918 | 0.086617  |
| 3  | C | 4.572974 | -0.253061 | -0.494389 |
| 4  | C | 3.503460 | 0.581692  | -0.144216 |
| 5  | C | 3.705950 | 1.612808  | 0.781809  |
| 6  | C | 4.956178 | 1.799942  | 1.366292  |
| 7  | H | 6.998369 | 1.105729  | 1.475435  |
| 8  | H | 6.658767 | -0.705478 | -0.194372 |
| 9  | H | 4.411631 | -1.012863 | -1.257855 |
| 10 | H | 2.864025 | 2.258307  | 1.036974  |
| 11 | H | 5.105486 | 2.599437  | 2.093532  |
| 12 | C | 2.120185 | 0.401892  | -0.704520 |
| 13 | O | 1.318394 | 1.315437  | -0.619639 |
| 14 | C | 1.743422 | -0.940018 | -1.284045 |
| 15 | C | 0.394023 | -1.179334 | -1.514168 |

|    |   |           |           |           |
|----|---|-----------|-----------|-----------|
| 16 | H | 2.325092  | -1.777272 | -0.881272 |
| 17 | H | 0.065429  | -2.186301 | -1.776519 |
| 18 | C | -0.505183 | -1.793403 | 0.901808  |
| 19 | C | 0.561012  | -1.082155 | 1.683048  |
| 20 | H | 0.708525  | -0.035807 | 1.407547  |
| 21 | H | 0.257255  | -1.126611 | 2.742118  |
| 22 | H | 1.497643  | -1.637738 | 1.565226  |
| 23 | H | -0.234446 | -0.346664 | -1.839977 |
| 24 | F | 2.751418  | -0.687596 | -2.635616 |
| 25 | O | -0.609596 | -2.986421 | 0.829326  |
| 26 | N | -1.716421 | -0.990601 | 0.597467  |
| 27 | C | -1.662077 | 0.337163  | 0.313253  |
| 28 | C | -2.911451 | -1.631882 | 0.587957  |
| 29 | C | -2.792178 | 1.059651  | 0.059940  |
| 30 | H | -0.670423 | 0.784774  | 0.233108  |
| 31 | C | -4.084185 | -0.976413 | 0.340286  |
| 32 | H | -2.865662 | -2.699824 | 0.795424  |
| 33 | C | -4.075871 | 0.428057  | 0.077399  |
| 34 | H | -2.680451 | 2.114999  | -0.172907 |
| 35 | H | -5.006949 | -1.549905 | 0.357221  |
| 36 | N | -5.198651 | 1.110808  | -0.148231 |
| 37 | C | -5.145942 | 2.544554  | -0.405119 |
| 38 | H | -4.673485 | 3.074779  | 0.433955  |
| 39 | H | -4.583509 | 2.760165  | -1.325139 |
| 40 | H | -6.165415 | 2.920506  | -0.523371 |
| 41 | C | -6.484530 | 0.425081  | -0.144265 |
| 42 | H | -6.515680 | -0.354893 | -0.918487 |
| 43 | H | -6.679593 | -0.036580 | 0.834465  |
| 44 | H | -7.274637 | 1.151762  | -0.350343 |

29b

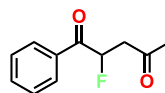

|    |   |           |           |           |
|----|---|-----------|-----------|-----------|
| 1  | C | 4.120698  | 0.058065  | -0.482675 |
| 2  | C | 3.240833  | 1.083757  | -0.829970 |
| 3  | C | 1.884784  | 0.973309  | -0.528770 |
| 4  | C | 1.404679  | -0.172782 | 0.120053  |
| 5  | C | 2.293689  | -1.200587 | 0.464147  |
| 6  | C | 3.646949  | -1.085201 | 0.166377  |
| 7  | H | 5.182061  | 0.149709  | -0.718393 |
| 8  | H | 3.612154  | 1.975582  | -1.335846 |
| 9  | H | 1.209757  | 1.787820  | -0.791063 |
| 10 | H | 1.900565  | -2.085714 | 0.965638  |
| 11 | H | 4.336078  | -1.885809 | 0.437647  |
| 12 | C | -0.039297 | -0.366457 | 0.442451  |
| 13 | O | -0.457231 | -1.399838 | 0.911474  |
| 14 | C | -1.000462 | 0.801770  | 0.168109  |
| 15 | C | -2.419669 | 0.552445  | 0.651360  |

|    |   |           |           |           |
|----|---|-----------|-----------|-----------|
| 16 | H | -0.982178 | 1.037345  | -0.909849 |
| 17 | H | -2.876149 | 1.523524  | 0.878710  |
| 18 | C | -3.340187 | -0.158165 | -0.329839 |
| 19 | C | -2.805770 | -1.353290 | -1.075124 |
| 20 | H | -2.488212 | -2.119783 | -0.354532 |
| 21 | H | -3.582121 | -1.744783 | -1.741388 |
| 22 | H | -1.914871 | -1.082416 | -1.662263 |
| 23 | H | -2.387053 | -0.046575 | 1.575346  |
| 24 | F | -0.492612 | 1.902667  | 0.834569  |
| 25 | O | -4.479519 | 0.221076  | -0.467954 |

**29c**

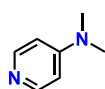

|    |   |           |           |           |
|----|---|-----------|-----------|-----------|
| 1  | N | -2.660833 | -0.000007 | 0.000222  |
| 2  | C | -1.950601 | 1.131412  | 0.000077  |
| 3  | C | -1.950580 | -1.131422 | 0.000085  |
| 4  | C | -0.564008 | 1.199376  | -0.000165 |
| 5  | H | -2.521349 | 2.066170  | 0.000175  |
| 6  | C | -0.563988 | -1.199364 | -0.000224 |
| 7  | H | -2.521328 | -2.066178 | 0.000195  |
| 8  | C | 0.189368  | 0.000007  | -0.000266 |
| 9  | H | -0.081306 | 2.174612  | -0.000246 |
| 10 | H | -0.081288 | -2.174606 | -0.000541 |
| 11 | N | 1.548972  | 0.000007  | -0.000417 |
| 12 | C | 2.267976  | 1.257125  | 0.000178  |
| 13 | H | 2.031342  | 1.860499  | -0.891316 |
| 14 | H | 2.030590  | 1.860054  | 0.891776  |
| 15 | H | 3.343863  | 1.055760  | 0.000444  |
| 16 | C | 2.267960  | -1.257126 | 0.000236  |
| 17 | H | 2.030345  | -1.860151 | 0.891695  |
| 18 | H | 2.031556  | -1.860412 | -0.891364 |
| 19 | H | 3.343835  | -1.055791 | 0.001024  |

**30a: CH<sub>2</sub>CHNO<sub>2</sub>**

|   |   |           |           |           |
|---|---|-----------|-----------|-----------|
| 1 | C | 1.861319  | 0.060745  | 0.000254  |
| 2 | H | 1.824119  | 1.150853  | 0.000981  |
| 3 | H | 2.826240  | -0.445995 | 0.000135  |
| 4 | C | 0.742874  | -0.649048 | -0.000384 |
| 5 | H | 0.639270  | -1.731598 | -0.000902 |
| 6 | N | -0.558356 | 0.028035  | 0.000002  |
| 7 | O | -0.593996 | 1.235796  | -0.000249 |
| 8 | O | -1.531790 | -0.690757 | 0.000318  |

**30-TS (Frequency: 204.6118 i cm<sup>-1</sup>)**

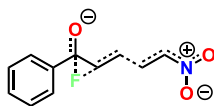

|   |   |          |          |          |
|---|---|----------|----------|----------|
| 1 | C | 0.139353 | 0.864856 | 0.697718 |
|---|---|----------|----------|----------|

|    |   |           |           |           |
|----|---|-----------|-----------|-----------|
| 2  | C | 0.216602  | 2.244858  | 0.131268  |
| 3  | H | -0.533743 | 2.887911  | 0.605310  |
| 4  | C | 0.240968  | 2.274283  | -1.267953 |
| 5  | H | 0.825501  | 1.545231  | -1.831336 |
| 6  | H | -0.135877 | 3.145287  | -1.808815 |
| 7  | O | -0.798398 | 0.510303  | 1.394819  |
| 8  | F | 1.532198  | 2.810095  | 0.947077  |
| 9  | C | -2.042256 | 0.468746  | -1.767613 |
| 10 | H | -2.611454 | 1.321594  | -1.401365 |
| 11 | H | -1.487488 | 0.566412  | -2.697640 |
| 12 | C | -2.074581 | -0.698597 | -1.123004 |
| 13 | H | -1.544589 | -1.608848 | -1.391440 |
| 14 | N | -2.842592 | -0.847886 | 0.095915  |
| 15 | O | -3.565253 | 0.052085  | 0.462045  |
| 16 | O | -2.737279 | -1.911764 | 0.678748  |
| 17 | C | 1.190448  | -0.140109 | 0.312749  |
| 18 | C | 2.476130  | 0.243474  | -0.089300 |
| 19 | C | 0.869321  | -1.500367 | 0.406573  |
| 20 | C | 3.420092  | -0.729176 | -0.419549 |
| 21 | H | 2.709243  | 1.307651  | -0.111454 |
| 22 | C | 1.811814  | -2.469366 | 0.069239  |
| 23 | H | -0.134367 | -1.776606 | 0.737561  |
| 24 | C | 3.089087  | -2.083557 | -0.345950 |
| 25 | H | 4.422782  | -0.430038 | -0.729993 |
| 26 | H | 1.554041  | -3.528047 | 0.131268  |
| 27 | H | 3.829875  | -2.841449 | -0.607169 |

**30b**

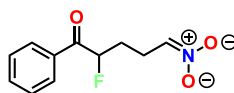

|    |   |           |           |           |
|----|---|-----------|-----------|-----------|
| 1  | C | 0.084856  | 0.198951  | 1.075543  |
| 2  | C | -0.780193 | 1.330789  | 0.505905  |
| 3  | H | -1.774421 | 1.208805  | 0.958557  |
| 4  | C | -0.913819 | 1.423589  | -1.007709 |
| 5  | H | -0.039085 | 1.953932  | -1.411984 |
| 6  | H | -1.795420 | 2.047662  | -1.199150 |
| 7  | O | -0.299094 | -0.427704 | 2.037242  |
| 8  | F | -0.225364 | 2.520962  | 0.978910  |
| 9  | C | -1.074990 | 0.059989  | -1.711099 |
| 10 | H | -1.641998 | 0.234122  | -2.643891 |
| 11 | H | -0.081649 | -0.300019 | -2.019865 |
| 12 | C | -1.684283 | -1.026931 | -0.884607 |
| 13 | H | -1.215985 | -1.996969 | -0.738920 |
| 14 | N | -2.860133 | -0.866652 | -0.289056 |
| 15 | O | -3.489762 | 0.232384  | -0.415352 |
| 16 | O | -3.364270 | -1.786485 | 0.419343  |
| 17 | C | 1.422891  | -0.077051 | 0.463617  |
| 18 | C | 2.176626  | 0.929904  | -0.151514 |

|    |   |          |           |           |
|----|---|----------|-----------|-----------|
| 19 | C | 1.936234 | -1.376820 | 0.552785  |
| 20 | C | 3.429073 | 0.630275  | -0.686991 |
| 21 | H | 1.793930 | 1.950301  | -0.184616 |
| 22 | C | 3.178263 | -1.677008 | 0.000958  |
| 23 | H | 1.340185 | -2.143160 | 1.051282  |
| 24 | C | 3.925088 | -0.672294 | -0.619858 |
| 25 | H | 4.020691 | 1.417222  | -1.156580 |
| 26 | H | 3.568971 | -2.694055 | 0.055790  |
| 27 | H | 4.900518 | -0.905851 | -1.049464 |

**31**

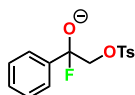

|    |   |           |           |           |
|----|---|-----------|-----------|-----------|
| 1  | C | 2.699350  | -0.139055 | -0.384960 |
| 2  | H | 3.631465  | -0.276978 | -0.944894 |
| 3  | H | 2.924504  | 0.000771  | 0.679546  |
| 4  | F | 3.041256  | 2.084796  | -0.787728 |
| 5  | O | 1.984919  | -1.383323 | -0.553744 |
| 6  | S | 1.036754  | -1.968226 | 0.587461  |
| 7  | O | 1.062926  | -3.402688 | 0.375693  |
| 8  | O | 1.427510  | -1.431882 | 1.881090  |
| 9  | C | -0.569292 | -1.371559 | 0.162348  |
| 10 | C | -1.021462 | -1.521288 | -1.148103 |
| 11 | C | -1.379619 | -0.844408 | 1.162272  |
| 12 | C | -2.315660 | -1.117954 | -1.455853 |
| 13 | H | -0.361066 | -1.924545 | -1.917116 |
| 14 | C | -2.676566 | -0.458477 | 0.835203  |
| 15 | H | -0.991280 | -0.728100 | 2.174439  |
| 16 | C | -3.160610 | -0.582823 | -0.472262 |
| 17 | H | -2.680291 | -1.219130 | -2.479981 |
| 18 | H | -3.320926 | -0.037178 | 1.609605  |
| 19 | C | 1.954270  | 1.043634  | -1.044505 |
| 20 | O | 1.697596  | 0.897822  | -2.274955 |
| 21 | C | 0.813685  | 1.606939  | -0.165899 |
| 22 | C | 0.956879  | 1.852635  | 1.203983  |
| 23 | C | -0.394456 | 1.932505  | -0.783702 |
| 24 | C | -0.091585 | 2.405491  | 1.940844  |
| 25 | H | 1.899846  | 1.620619  | 1.703459  |
| 26 | C | -1.442859 | 2.494615  | -0.055776 |
| 27 | H | -0.476515 | 1.728248  | -1.852247 |
| 28 | C | -1.294516 | 2.732093  | 1.311740  |
| 29 | H | 0.032829  | 2.590895  | 3.009805  |
| 30 | H | -2.382681 | 2.744452  | -0.553866 |
| 31 | H | -2.114297 | 3.166667  | 1.887206  |
| 32 | C | -4.544445 | -0.108604 | -0.822960 |
| 33 | H | -4.528778 | 0.968789  | -1.051322 |
| 34 | H | -4.934311 | -0.630096 | -1.706506 |
| 35 | H | -5.240175 | -0.257847 | 0.013159  |

**31-TS (Frequency: 657.3899 i cm<sup>-1</sup>)**

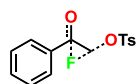

|    |   |           |           |           |
|----|---|-----------|-----------|-----------|
| 1  | C | -2.696433 | 0.310479  | 0.439556  |
| 2  | H | -3.577583 | 0.090548  | 1.031160  |
| 3  | H | -2.764725 | 0.284702  | -0.641955 |
| 4  | F | -3.273045 | 2.124087  | 0.352767  |
| 5  | O | -2.069669 | -1.329043 | 0.607724  |
| 6  | S | -1.253741 | -1.951280 | -0.539288 |
| 7  | O | -1.334271 | -3.404259 | -0.427627 |
| 8  | O | -1.621782 | -1.361824 | -1.829104 |
| 9  | C | 0.425116  | -1.479250 | -0.195223 |
| 10 | C | 0.936570  | -1.677517 | 1.086544  |
| 11 | C | 1.218068  | -0.964901 | -1.216684 |
| 12 | C | 2.265362  | -1.351124 | 1.341117  |
| 13 | H | 0.296532  | -2.073931 | 1.876907  |
| 14 | C | 2.546882  | -0.648128 | -0.946153 |
| 15 | H | 0.787020  | -0.808723 | -2.206108 |
| 16 | C | 3.088876  | -0.832915 | 0.331703  |
| 17 | H | 2.673439  | -1.500276 | 2.343028  |
| 18 | H | 3.174158  | -0.239746 | -1.741664 |
| 19 | C | -1.596627 | 1.038447  | 1.149553  |
| 20 | O | -1.511650 | 1.008882  | 2.359671  |
| 21 | C | -0.531587 | 1.692347  | 0.315936  |
| 22 | C | -0.756365 | 2.094948  | -1.005298 |
| 23 | C | 0.725425  | 1.886954  | 0.895870  |
| 24 | C | 0.278618  | 2.665024  | -1.743862 |
| 25 | H | -1.761938 | 2.007612  | -1.414187 |
| 26 | C | 1.758334  | 2.461057  | 0.157819  |
| 27 | H | 0.878121  | 1.572827  | 1.929590  |
| 28 | C | 1.537389  | 2.844844  | -1.165834 |
| 29 | H | 0.100057  | 2.984875  | -2.771835 |
| 30 | H | 2.739873  | 2.605495  | 0.613118  |
| 31 | H | 2.346245  | 3.290683  | -1.747529 |
| 32 | C | 4.513326  | -0.444378 | 0.622095  |
| 33 | H | 4.574543  | 0.627807  | 0.866558  |
| 34 | H | 4.914094  | -1.003649 | 1.477315  |
| 35 | H | 5.158673  | -0.619890 | -0.248823 |

**31-IM**

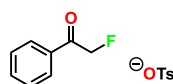

|   |   |          |           |          |
|---|---|----------|-----------|----------|
| 1 | C | 2.650258 | -1.405728 | 0.797974 |
| 2 | H | 3.304586 | -1.253664 | 1.666414 |
| 3 | H | 2.838126 | -0.637850 | 0.035382 |
| 4 | F | 2.885045 | -2.655538 | 0.256334 |

|    |   |           |           |           |
|----|---|-----------|-----------|-----------|
| 5  | O | 2.327174  | 1.585853  | 0.783929  |
| 6  | S | 1.625436  | 1.810758  | -0.500216 |
| 7  | O | 1.734264  | 3.197670  | -0.991183 |
| 8  | O | 1.968568  | 0.804479  | -1.534106 |
| 9  | C | -0.113155 | 1.554816  | -0.144946 |
| 10 | C | -0.591664 | 1.718546  | 1.150551  |
| 11 | C | -0.983501 | 1.219410  | -1.182981 |
| 12 | C | -1.952468 | 1.544624  | 1.408004  |
| 13 | H | 0.110106  | 1.954302  | 1.951314  |
| 14 | C | -2.336957 | 1.048340  | -0.915235 |
| 15 | H | -0.586807 | 1.072090  | -2.189013 |
| 16 | C | -2.842335 | 1.204520  | 0.384383  |
| 17 | H | -2.328360 | 1.664940  | 2.426819  |
| 18 | H | -3.017561 | 0.772764  | -1.724728 |
| 19 | C | 1.203453  | -1.311176 | 1.262016  |
| 20 | O | 0.940599  | -0.927021 | 2.379668  |
| 21 | C | 0.136833  | -1.736574 | 0.305273  |
| 22 | C | 0.399897  | -1.932499 | -1.056466 |
| 23 | C | -1.159869 | -1.925310 | 0.797973  |
| 24 | C | -0.628920 | -2.320901 | -1.911948 |
| 25 | H | 1.400255  | -1.756508 | -1.449767 |
| 26 | C | -2.183547 | -2.323281 | -0.056545 |
| 27 | H | -1.344063 | -1.755135 | 1.859890  |
| 28 | C | -1.917304 | -2.520960 | -1.413423 |
| 29 | H | -0.425632 | -2.467207 | -2.973833 |
| 30 | H | -3.191251 | -2.479859 | 0.332000  |
| 31 | H | -2.719052 | -2.830635 | -2.086250 |
| 32 | C | -4.301901 | 0.965547  | 0.665241  |
| 33 | H | -4.528156 | -0.111772 | 0.628711  |
| 34 | H | -4.584923 | 1.335843  | 1.659022  |
| 35 | H | -4.937402 | 1.456302  | -0.085202 |

32

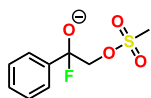

|    |   |           |           |           |
|----|---|-----------|-----------|-----------|
| 1  | C | 0.690896  | 1.722979  | 0.305960  |
| 2  | H | 1.122203  | 2.723729  | 0.171793  |
| 3  | H | 0.794962  | 1.401588  | 1.348653  |
| 4  | F | -1.359947 | 2.523111  | 0.987750  |
| 5  | C | -0.774919 | 1.766354  | -0.182324 |
| 6  | O | -0.968186 | 2.348237  | -1.290962 |
| 7  | C | -1.415449 | 0.369665  | -0.021161 |
| 8  | C | -1.944519 | -0.249737 | -1.153496 |
| 9  | C | -1.452038 | -0.308202 | 1.202930  |
| 10 | C | -2.483558 | -1.535438 | -1.079153 |
| 11 | H | -1.911682 | 0.312389  | -2.088182 |
| 12 | C | -1.987696 | -1.594349 | 1.284477  |
| 13 | H | -1.056763 | 0.176149  | 2.098105  |

|    |   |           |           |           |
|----|---|-----------|-----------|-----------|
| 14 | C | -2.500429 | -2.213807 | 0.141033  |
| 15 | H | -2.888519 | -2.013155 | -1.973636 |
| 16 | H | -2.007790 | -2.117498 | 2.242504  |
| 17 | H | -2.914586 | -3.221695 | 0.203628  |
| 18 | O | 1.448576  | 0.832264  | -0.544987 |
| 19 | S | 2.144853  | -0.491561 | 0.025701  |
| 20 | O | 3.492741  | -0.506326 | -0.510231 |
| 21 | O | 1.961387  | -0.560623 | 1.466849  |
| 22 | C | 1.221977  | -1.778993 | -0.757398 |
| 23 | H | 1.740320  | -2.713248 | -0.510785 |
| 24 | H | 0.198197  | -1.775086 | -0.366603 |
| 25 | H | 1.243822  | -1.595429 | -1.837013 |

32-TS (Frequency: 660.7201 i cm<sup>-1</sup>)

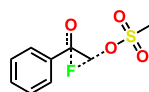

|    |   |           |           |           |
|----|---|-----------|-----------|-----------|
| 1  | C | 0.637577  | 1.755106  | 0.311342  |
| 2  | H | 1.207057  | 2.659269  | 0.123343  |
| 3  | H | 0.746086  | 1.251806  | 1.263900  |
| 4  | F | -0.743489 | 2.774471  | 1.135607  |
| 5  | C | -0.530413 | 1.518895  | -0.589213 |
| 6  | O | -0.649217 | 2.105343  | -1.644015 |
| 7  | C | -1.455007 | 0.397853  | -0.212347 |
| 8  | C | -2.098556 | -0.298710 | -1.239931 |
| 9  | C | -1.642041 | 0.007745  | 1.118292  |
| 10 | C | -2.893567 | -1.405176 | -0.945616 |
| 11 | H | -1.949309 | 0.031450  | -2.269304 |
| 12 | C | -2.441647 | -1.095241 | 1.411686  |
| 13 | H | -1.190957 | 0.612606  | 1.904255  |
| 14 | C | -3.058643 | -1.808533 | 0.381012  |
| 15 | H | -3.382679 | -1.956736 | -1.749978 |
| 16 | H | -2.591317 | -1.397832 | 2.449263  |
| 17 | H | -3.676754 | -2.677253 | 0.613739  |
| 18 | O | 1.763184  | 0.699057  | -0.553840 |
| 19 | S | 2.204931  | -0.638631 | 0.073468  |
| 20 | O | 3.608778  | -0.880645 | -0.246591 |
| 21 | O | 1.833140  | -0.697206 | 1.490880  |
| 22 | C | 1.247527  | -1.866854 | -0.781393 |
| 23 | H | 1.575741  | -2.844100 | -0.409000 |
| 24 | H | 0.185908  | -1.701802 | -0.562704 |
| 25 | H | 1.450263  | -1.772456 | -1.853931 |

32-IM

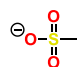

|   |   |          |           |           |
|---|---|----------|-----------|-----------|
| 1 | O | 0.549951 | -1.098456 | 0.910856  |
| 2 | S | 0.159872 | -0.000020 | -0.000066 |

|   |   |           |           |           |
|---|---|-----------|-----------|-----------|
| 3 | O | 0.551140  | 1.338237  | 0.494508  |
| 4 | O | 0.547441  | -0.240727 | -1.407146 |
| 5 | C | -1.633698 | 0.000820  | 0.001568  |
| 6 | H | -1.981919 | 0.802335  | -0.660505 |
| 7 | H | -1.982166 | -0.973503 | -0.360841 |
| 8 | H | -1.979946 | 0.174144  | 1.027243  |

**33**

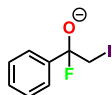

|    |   |           |           |           |
|----|---|-----------|-----------|-----------|
| 1  | C | -0.885506 | 1.159936  | -0.631341 |
| 2  | H | -1.617229 | 1.970809  | -0.548123 |
| 3  | H | -0.581314 | 1.008958  | -1.672325 |
| 4  | F | 0.815276  | 2.670306  | -0.383557 |
| 5  | C | 0.287876  | 1.448797  | 0.352499  |
| 6  | O | -0.035810 | 1.703278  | 1.545670  |
| 7  | C | 1.436376  | 0.439267  | 0.142267  |
| 8  | C | 2.108555  | 0.304620  | -1.077637 |
| 9  | C | 1.808750  | -0.375375 | 1.211657  |
| 10 | C | 3.124223  | -0.639805 | -1.228172 |
| 11 | H | 1.840301  | 0.959962  | -1.909018 |
| 12 | C | 2.823751  | -1.323425 | 1.067659  |
| 13 | H | 1.280689  | -0.235720 | 2.156803  |
| 14 | C | 3.482298  | -1.460149 | -0.155187 |
| 15 | H | 3.643868  | -0.734346 | -2.183849 |
| 16 | H | 3.103700  | -1.958108 | 1.911056  |
| 17 | H | 4.275685  | -2.200619 | -0.272546 |
| 18 | I | -1.964427 | -0.637606 | -0.084638 |

**33-TS (Frequency: 461.0191 i cm<sup>-1</sup>)**

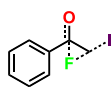

|   |   |           |          |           |
|---|---|-----------|----------|-----------|
| 1 | C | 0.681051  | 1.348903 | 0.343696  |
| 2 | H | 1.420967  | 2.102822 | 0.092042  |
| 3 | H | 0.438360  | 1.198720 | 1.389738  |
| 4 | F | -0.708891 | 2.814373 | 0.375030  |
| 5 | C | -0.330566 | 1.047417 | -0.717745 |

|    |   |           |           |           |
|----|---|-----------|-----------|-----------|
| 6  | O | -0.106228 | 1.266480  | -1.889882 |
| 7  | C | -1.544842 | 0.265209  | -0.291744 |
| 8  | C | -2.201966 | 0.501915  | 0.920833  |
| 9  | C | -2.006602 | -0.738980 | -1.147782 |
| 10 | C | -3.302193 | -0.275480 | 1.277879  |
| 11 | H | -1.859310 | 1.339340  | 1.528029  |
| 12 | C | -3.102896 | -1.521274 | -0.785157 |
| 13 | H | -1.490889 | -0.901187 | -2.096081 |
| 14 | C | -3.749786 | -1.291697 | 0.429984  |
| 15 | H | -3.821434 | -0.082702 | 2.218262  |
| 16 | H | -3.453515 | -2.311542 | -1.451001 |
| 17 | H | -4.609012 | -1.901461 | 0.714603  |
| 18 | I | 2.150028  | -0.583420 | 0.172989  |

**33-IM: I<sup>-</sup>**

|   |   |          |          |          |
|---|---|----------|----------|----------|
| 1 | I | 0.000000 | 0.000000 | 0.000000 |
|---|---|----------|----------|----------|

**34**

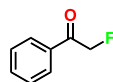

|    |   |           |           |           |
|----|---|-----------|-----------|-----------|
| 1  | C | -2.444009 | -0.361750 | 0.198232  |
| 2  | H | -3.385284 | 0.115610  | -0.104124 |
| 3  | H | -2.538580 | -0.729492 | 1.233013  |
| 4  | F | -2.178243 | -1.423813 | -0.630061 |
| 5  | C | -1.345205 | 0.691788  | 0.145309  |
| 6  | O | -1.656943 | 1.859479  | 0.205862  |
| 7  | C | 0.083713  | 0.262719  | 0.065573  |
| 8  | C | 1.042836  | 1.248126  | -0.205626 |
| 9  | C | 0.490902  | -1.058460 | 0.295775  |
| 10 | C | 2.392780  | 0.918025  | -0.256253 |
| 11 | H | 0.706098  | 2.272112  | -0.372848 |
| 12 | C | 1.845893  | -1.383695 | 0.256206  |
| 13 | H | -0.243703 | -1.835447 | 0.505187  |
| 14 | C | 2.794805  | -0.399961 | -0.023494 |
| 15 | H | 3.135502  | 1.686479  | -0.474240 |
| 16 | H | 2.161665  | -2.410924 | 0.442021  |
| 17 | H | 3.853747  | -0.660606 | -0.059689 |

## 2. Thermodynamics Data

In this section, all the thermodynamics data of the calculated reactions is presented in table. The symbol of the table is shown below.

| Structure                 |          | The structure of below calculation results                             |
|---------------------------|----------|------------------------------------------------------------------------|
| ZPE (M05-2X/Gas)          | a.u.     | The SPE at the level of M05-2X/6-31G* without solvent                  |
| ZPE (M05-2X/SMD)          | a.u.     | The SPE at the level of M05-2X/6-31G* with solvent by SMD model        |
| Solvation delta G         | kJ/mol   | The Solvation delta G is calculated by <b>Eq. (1)</b> shown in article |
| ZPE (M06-2X/IEFPCM)       | a.u.     | The SPE at the level of M06-2X/def2-SVP with solvent by IEFPCM model   |
| ZPE (double hybrid)       | a.u.     | The SPE at the level of rev-DSDPBEP86-D3(BJ)/def2-TZVPP                |
| ZPE_corr                  | a.u.     | Zero-point correction                                                  |
| U_corr                    | a.u.     | Thermal correction to Energy                                           |
| H_corr                    | a.u.     | Thermal correction to Enthalpy                                         |
| G_corr                    | a.u.     | Thermal correction to Gibbs Free Energy                                |
| U(T)                      | a.u.     | Sum of ZPE (double hybrid) and U_corr                                  |
| H(T)                      | a.u.     | Sum of ZPE (double hybrid) and H_corr                                  |
| G(T)                      | a.u.     | Sum of ZPE (double hybrid) and G_corr                                  |
| Electron energy barrier   | kJ/mol   | The electron energy barrier in the unit of kJ/mol                      |
| Delta electron energy     | kJ/mol   | The delta electron energy in the unit of kJ/mol                        |
| Gibbs Free Energy Barrier | kJ/mol   | The Gibbs free energy barrier in the unit of kJ/mol                    |
| Delta G                   | kJ/mol   | The delta Gibbs free energy in the unit of kJ/mol                      |
| Electron energy barrier   | kcal/mol | The electron energy barrier in the unit of kcal/mol                    |
| Delta electron energy     | kcal/mol | The delta electron energy in the unit of kcal/mol                      |
| Gibbs Free Energy Barrier | kcal/mol | The Gibbs free energy barrier in the unit of kcal/mol                  |
| Delta G                   | kcal/mol | The delta Gibbs free energy in the unit of kcal/mol                    |

**Table S4:** Thermodynamics data of epoxide-induced 1,2-fluorine migration.

| Structure                 |          | 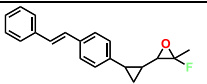 |  |  |
|---------------------------|----------|-----------------------------------------------------------------------------------|------------------------------------------------------------------------------------|-------------------------------------------------------------------------------------|
| ZPE (M05-2X/Gas)          | a.u.     | -948.47351480                                                                     | -948.39837210                                                                      | -948.49408690                                                                       |
| ZPE (M05-2X/SMD)          | a.u.     | -948.50345630                                                                     | -948.44370570                                                                      | -948.52548090                                                                       |
| Solvation delta G         | kJ/mol   | -78.61140825                                                                      | -119.02336680                                                                      | -82.42494700                                                                        |
| ZPE (M06-2X/IEFPCM)       | a.u.     | -947.49438670                                                                     | -947.42516120                                                                      | -947.51531000                                                                       |
| ZPE (double hybrid)       | a.u.     | -947.15594260                                                                     | -947.09158510                                                                      | -947.18120980                                                                       |
| ZPE_corr                  | a.u.     | 0.322474                                                                          | 0.334935                                                                           | 0.337839                                                                            |
| U_corr                    | a.u.     | 0.357892                                                                          | 0.354583                                                                           | 0.357774                                                                            |
| H_corr                    | a.u.     | 0.358837                                                                          | 0.355528                                                                           | 0.358718                                                                            |
| G_corr                    | a.u.     | 0.287012                                                                          | 0.283464                                                                           | 0.285425                                                                            |
| U(T)                      | a.u.     | -946.7980506000                                                                   | -946.7370021000                                                                    | -946.8234358000                                                                     |
| H(T)                      | a.u.     | -946.7971056000                                                                   | -946.7360571000                                                                    | -946.8224918000                                                                     |
| G(T)                      | a.u.     | -946.8689306000                                                                   | -946.8081211000                                                                    | -946.8957848000                                                                     |
| Electron energy barrier   | kJ/mol   | 181.7515502497                                                                    |                                                                                    |                                                                                     |
| Delta electron energy     | kJ/mol   | -54.9341241501                                                                    |                                                                                    |                                                                                     |
| Gibbs Free Energy Barrier | kJ/mol   | 119.2433837001                                                                    |                                                                                    |                                                                                     |
| Delta G                   | kJ/mol   | -74.3192408501                                                                    |                                                                                    |                                                                                     |
| Electron energy barrier   | kcal/mol | 43.4396630616                                                                     |                                                                                    |                                                                                     |
| Delta electron energy     | kcal/mol | -13.1295707816                                                                    |                                                                                    |                                                                                     |
| Gibbs Free Energy Barrier | kcal/mol | 28.4998527008                                                                     |                                                                                    |                                                                                     |
| Delta G                   | kcal/mol | -17.7627248686                                                                    |                                                                                    |                                                                                     |



**Table S5:** Thermodynamics data of **3a**.

| Structure                 |          | 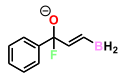 |  |  |
|---------------------------|----------|-----------------------------------------------------------------------------------|------------------------------------------------------------------------------------|-------------------------------------------------------------------------------------|
| ZPE (M05-2X/Gas)          | a.u.     | -548.21846319                                                                     | -548.19654747                                                                      | -548.21739657                                                                       |
| ZPE (M05-2X/SMD)          | a.u.     | -548.30599311                                                                     | -548.29130484                                                                      | -548.31454801                                                                       |
| Solvation delta G         | kJ/mol   | -229.80981021                                                                     | -248.78547756                                                                      | -255.07108209                                                                       |
| ZPE (M06-2X/IEFPCM)       | a.u.     | -547.73600948                                                                     | -547.72112080                                                                      | -547.74648949                                                                       |
| ZPE (double hybrid)       | a.u.     | -547.50984894                                                                     | -547.50620451                                                                      | -547.51255760                                                                       |
| ZPE_corr                  | a.u.     | 0.156801                                                                          | 0.156623                                                                           | 0.158291                                                                            |
| U_corr                    | a.u.     | 0.167955                                                                          | 0.167509                                                                           | 0.169104                                                                            |
| H_corr                    | a.u.     | 0.168899                                                                          | 0.168453                                                                           | 0.170048                                                                            |
| G_corr                    | a.u.     | 0.119061                                                                          | 0.119294                                                                           | 0.120966                                                                            |
| U(T)                      | a.u.     | -547.3418939364                                                                   | -547.3386955104                                                                    | -547.3434535982                                                                     |
| H(T)                      | a.u.     | -547.3409499364                                                                   | -547.3377515104                                                                    | -547.3425095982                                                                     |
| G(T)                      | a.u.     | -547.3907879364                                                                   | -547.3869105104                                                                    | -547.3915915982                                                                     |
| Electron energy barrier   | kJ/mol   | 39.0902135872                                                                     |                                                                                    |                                                                                     |
| Delta electron energy     | kJ/mol   | -27.5152741315                                                                    |                                                                                    |                                                                                     |
| Gibbs Free Energy Barrier | kJ/mol   | -8.7954852287                                                                     |                                                                                    |                                                                                     |
| Delta G                   | kJ/mol   | -27.3712858568                                                                    |                                                                                    |                                                                                     |
| Electron energy barrier   | kcal/mol | 9.3427852742                                                                      |                                                                                    |                                                                                     |
| Delta electron energy     | kcal/mol | -6.5763083488                                                                     |                                                                                    |                                                                                     |
| Gibbs Free Energy Barrier | kcal/mol | -2.1021714218                                                                     |                                                                                    |                                                                                     |
| Delta G                   | kcal/mol | -6.5418943252                                                                     |                                                                                    |                                                                                     |

**Table S6:** Thermodynamics data of **3b**.

| Structure                 |          | 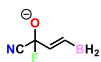 |  |  |
|---------------------------|----------|-----------------------------------------------------------------------------------|-----------------------------------------------------------------------------------|-------------------------------------------------------------------------------------|
| ZPE (M05-2X/Gas)          | a.u.     | -409.42729193                                                                     | -409.40361061                                                                     | -409.42595216                                                                       |
| ZPE (M05-2X/SMD)          | a.u.     | -409.50618400                                                                     | -409.48064066                                                                     | -409.50085382                                                                       |
| Solvation delta G         | kJ/mol   | -207.13114029                                                                     | -202.24238577                                                                     | -196.65430308                                                                       |
| ZPE (M06-2X/IEFPCM)       | a.u.     | -409.09179385                                                                     | -409.06709868                                                                     | -409.09075476                                                                       |
| ZPE (double hybrid)       | a.u.     | -408.95222328                                                                     | -408.94366527                                                                     | -408.95578851                                                                       |
| ZPE_corr                  | a.u.     | 0.073759                                                                          | 0.073326                                                                          | 0.074627                                                                            |
| U_corr                    | a.u.     | 0.082268                                                                          | 0.081451                                                                          | 0.082926                                                                            |
| H_corr                    | a.u.     | 0.083212                                                                          | 0.082395                                                                          | 0.083870                                                                            |
| G_corr                    | a.u.     | 0.040412                                                                          | 0.040536                                                                          | 0.041166                                                                            |
| U(T)                      | a.u.     | -408.8699552751                                                                   | -408.8622142733                                                                   | -408.8728625098                                                                     |
| H(T)                      | a.u.     | -408.8690112751                                                                   | -408.8612702733                                                                   | -408.8719185098                                                                     |
| G(T)                      | a.u.     | -408.9118112751                                                                   | -408.9031292733                                                                   | -408.9146225098                                                                     |
| Electron energy barrier   | kJ/mol   | 64.8371583330                                                                     |                                                                                   |                                                                                     |
| Delta electron energy     | kJ/mol   | 2.7281255439                                                                      |                                                                                   |                                                                                     |
| Gibbs Free Energy Barrier | kJ/mol   | 27.6833502134                                                                     |                                                                                   |                                                                                     |
| Delta G                   | kJ/mol   | 3.0959403454                                                                      |                                                                                   |                                                                                     |
| Electron energy barrier   | kcal/mol | 15.4964527565                                                                     |                                                                                   |                                                                                     |
| Delta electron energy     | kcal/mol | 0.6520376539                                                                      |                                                                                   |                                                                                     |
| Gibbs Free Energy Barrier | kcal/mol | 6.6164794965                                                                      |                                                                                   |                                                                                     |
| Delta G                   | kcal/mol | 0.7399475013                                                                      |                                                                                   |                                                                                     |

**Table S7:** Thermodynamics data of **3c**.

| Structure                 |          | 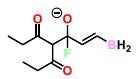 |  |  |
|---------------------------|----------|-----------------------------------------------------------------------------------|------------------------------------------------------------------------------------|-------------------------------------------------------------------------------------|
| ZPE (M05-2X/Gas)          | a.u.     | -740.37089590                                                                     | -740.35066459                                                                      | -740.35974677                                                                       |
| ZPE (M05-2X/SMD)          | a.u.     | -740.44749930                                                                     | -740.43174245                                                                      | -740.44957536                                                                       |
| Solvation delta G         | kJ/mol   | -201.12223720                                                                     | -212.86992931                                                                      | -235.84495254                                                                       |
| ZPE (M06-2X/IEFPCM)       | a.u.     | -739.68521629                                                                     | -739.66883032                                                                      | -739.68754649                                                                       |
| ZPE (double hybrid)       | a.u.     | -739.46932686                                                                     | -739.46375113                                                                      | -739.46377005                                                                       |
| ZPE_corr                  | a.u.     | 0.236087                                                                          | 0.235990                                                                           | 0.236617                                                                            |
| U_corr                    | a.u.     | 0.253483                                                                          | 0.253035                                                                           | 0.253840                                                                            |
| H_corr                    | a.u.     | 0.254427                                                                          | 0.253979                                                                           | 0.254784                                                                            |
| G_corr                    | a.u.     | 0.190560                                                                          | 0.191103                                                                           | 0.190757                                                                            |
| U(T)                      | a.u.     | -739.2158438616                                                                   | -739.2107161302                                                                    | -739.2099300512                                                                     |
| H(T)                      | a.u.     | -739.2148998616                                                                   | -739.2097721302                                                                    | -739.2089860512                                                                     |
| G(T)                      | a.u.     | -739.2787668616                                                                   | -739.2726481302                                                                    | -739.2730130512                                                                     |
| Electron energy barrier   | kJ/mol   | 43.0213484821                                                                     |                                                                                    |                                                                                     |
| Delta electron energy     | kJ/mol   | -6.1179479766                                                                     |                                                                                    |                                                                                     |
| Gibbs Free Energy Barrier | kJ/mol   | 4.3170373172                                                                      |                                                                                    |                                                                                     |
| Delta G                   | kJ/mol   | -19.6160859525                                                                    |                                                                                    |                                                                                     |
| Electron energy barrier   | kcal/mol | 10.2823490636                                                                     |                                                                                    |                                                                                     |
| Delta electron energy     | kcal/mol | -1.4622246598                                                                     |                                                                                    |                                                                                     |
| Gibbs Free Energy Barrier | kcal/mol | 1.0317966819                                                                      |                                                                                    |                                                                                     |
| Delta G                   | kcal/mol | -4.6883570632                                                                     |                                                                                    |                                                                                     |

**Table S8:** Thermodynamics data of **3d**.

| Structure                 |          | 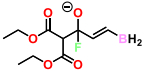 |  |  |
|---------------------------|----------|-----------------------------------------------------------------------------------|------------------------------------------------------------------------------------|-------------------------------------------------------------------------------------|
| ZPE (M05-2X/Gas)          | a.u.     | -890.80989338                                                                     | -890.79223321                                                                      | -890.81025584                                                                       |
| ZPE (M05-2X/SMD)          | a.u.     | -890.89876429                                                                     | -890.88541384                                                                      | -890.90768608                                                                       |
| Solvation delta G         | kJ/mol   | -225.40470581                                                                     | -236.71987567                                                                      | -247.87722148                                                                       |
| ZPE (M06-2X/IEFPCM)       | a.u.     | -889.99249981                                                                     | -889.97784753                                                                      | -890.00103379                                                                       |
| ZPE (double hybrid)       | a.u.     | -889.76610149                                                                     | -889.76223442                                                                      | -889.77099571                                                                       |
| ZPE_corr                  | a.u.     | 0.247668                                                                          | 0.247509                                                                           | 0.248699                                                                            |
| U_corr                    | a.u.     | 0.266930                                                                          | 0.266294                                                                           | 0.267546                                                                            |
| H_corr                    | a.u.     | 0.267874                                                                          | 0.267239                                                                           | 0.268490                                                                            |
| G_corr                    | a.u.     | 0.197825                                                                          | 0.199015                                                                           | 0.199621                                                                            |
| U(T)                      | a.u.     | -889.51843349                                                                     | -889.51472542                                                                      | -889.52229671                                                                       |
| H(T)                      | a.u.     | -889.49917149                                                                     | -889.49594042                                                                      | -889.50344971                                                                       |
| G(T)                      | a.u.     | -889.49822749                                                                     | -889.49499542                                                                      | -889.50250571                                                                       |
| Electron energy barrier   | kJ/mol   | 10.1530039947                                                                     |                                                                                    |                                                                                     |
| Delta electron energy     | kJ/mol   | -12.8497807011                                                                    |                                                                                    |                                                                                     |
| Gibbs Free Energy Barrier | kJ/mol   | -2.8293583653                                                                     |                                                                                    |                                                                                     |
| Delta G                   | kJ/mol   | -33.7049883652                                                                    |                                                                                    |                                                                                     |
| Electron energy barrier   | kcal/mol | 2.4266261938                                                                      |                                                                                    |                                                                                     |
| Delta electron energy     | kcal/mol | -3.0711712957                                                                     |                                                                                    |                                                                                     |
| Gibbs Free Energy Barrier | kcal/mol | -0.6762328789                                                                     |                                                                                    |                                                                                     |
| Delta G                   | kcal/mol | -8.0556855557                                                                     |                                                                                    |                                                                                     |

**Table S9:** Thermodynamics data of **4a**.

| Structure                 |          | 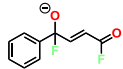 |  |  |
|---------------------------|----------|-----------------------------------------------------------------------------------|------------------------------------------------------------------------------------|-------------------------------------------------------------------------------------|
| ZPE (M05-2X/Gas)          | a.u.     | -735.36335651                                                                     | -735.34613475                                                                      | -735.36011410                                                                       |
| ZPE (M05-2X/SMD)          | a.u.     | -735.44887544                                                                     | -735.43605517                                                                      | -735.45194583                                                                       |
| Solvation delta G         | kJ/mol   | -224.52995597                                                                     | -236.08606796                                                                      | -241.10420449                                                                       |
| ZPE (M06-2X/IEFPCM)       | a.u.     | -734.69652771                                                                     | -734.68296994                                                                      | -734.70124914                                                                       |
| ZPE (double hybrid)       | a.u.     | -734.49940571                                                                     | -734.49674211                                                                      | -734.49590538                                                                       |
| ZPE_corr                  | a.u.     | 0.148950                                                                          | 0.148396                                                                           | 0.149852                                                                            |
| U_corr                    | a.u.     | 0.160977                                                                          | 0.160307                                                                           | 0.161872                                                                            |
| H_corr                    | a.u.     | 0.161921                                                                          | 0.161252                                                                           | 0.162817                                                                            |
| G_corr                    | a.u.     | 0.108783                                                                          | 0.108851                                                                           | 0.109397                                                                            |
| U(T)                      | a.u.     | -734.3384287130                                                                   | -734.3364351122                                                                    | -734.3340333828                                                                     |
| H(T)                      | a.u.     | -734.3374847130                                                                   | -734.3354901122                                                                    | -734.3330883828                                                                     |
| G(T)                      | a.u.     | -734.3906227130                                                                   | -734.3878911122                                                                    | -734.3865083828                                                                     |
| Electron energy barrier   | kJ/mol   | 35.5959330115                                                                     |                                                                                    |                                                                                     |
| Delta electron energy     | kJ/mol   | -12.3961039629                                                                    |                                                                                    |                                                                                     |
| Gibbs Free Energy Barrier | kJ/mol   | -4.3842939636                                                                     |                                                                                    |                                                                                     |
| Delta G                   | kJ/mol   | -5.7720745309                                                                     |                                                                                    |                                                                                     |
| Electron energy barrier   | kcal/mol | 8.5076321729                                                                      |                                                                                    |                                                                                     |
| Delta electron energy     | kcal/mol | -2.9627399529                                                                     |                                                                                    |                                                                                     |
| Gibbs Free Energy Barrier | kcal/mol | -1.0478714062                                                                     |                                                                                    |                                                                                     |
| Delta G                   | kcal/mol | -1.3795589223                                                                     |                                                                                    |                                                                                     |

**Table S10:** Thermodynamics data of **4b**.

| Structure                 |          | 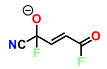 |  |  |
|---------------------------|----------|-----------------------------------------------------------------------------------|-----------------------------------------------------------------------------------|-------------------------------------------------------------------------------------|
| ZPE (M05-2X/Gas)          | a.u.     | -596.57063294                                                                     | -596.54532158                                                                     | -596.56429253                                                                       |
| ZPE (M05-2X/SMD)          | a.u.     | -596.64724936                                                                     | -596.62063122                                                                     | -596.63606899                                                                       |
| Solvation delta G         | kJ/mol   | -201.15642909                                                                     | -197.72544932                                                                     | -188.44909836                                                                       |
| ZPE (M06-2X/IEFPCM)       | a.u.     | -596.05054767                                                                     | -596.02414829                                                                     | -596.04282494                                                                       |
| ZPE (double hybrid)       | a.u.     | -595.94064729                                                                     | -595.92869249                                                                     | -595.93537093                                                                       |
| ZPE_corr                  | a.u.     | 0.065757                                                                          | 0.065009                                                                          | 0.066255                                                                            |
| U_corr                    | a.u.     | 0.075158                                                                          | 0.074187                                                                          | 0.075671                                                                            |
| H_corr                    | a.u.     | 0.076102                                                                          | 0.075131                                                                          | 0.076615                                                                            |
| G_corr                    | a.u.     | 0.029624                                                                          | 0.029556                                                                          | 0.029931                                                                            |
| U(T)                      | a.u.     | -595.8654892910                                                                   | -595.8545054944                                                                   | -595.8596999309                                                                     |
| H(T)                      | a.u.     | -595.8645452910                                                                   | -595.8535614944                                                                   | -595.8587559309                                                                     |
| G(T)                      | a.u.     | -595.9110232910                                                                   | -595.8991364944                                                                   | -595.9054399309                                                                     |
| Electron energy barrier   | kJ/mol   | 69.3115669392                                                                     |                                                                                   |                                                                                     |
| Delta electron energy     | kJ/mol   | 20.2760381171                                                                     |                                                                                   |                                                                                     |
| Gibbs Free Energy Barrier | kJ/mol   | 34.6397642963                                                                     |                                                                                   |                                                                                     |
| Delta G                   | kJ/mol   | 27.3664426492                                                                     |                                                                                   |                                                                                     |
| Electron energy barrier   | kcal/mol | 16.5658620792                                                                     |                                                                                   |                                                                                     |
| Delta electron energy     | kcal/mol | 4.8460894161                                                                      |                                                                                   |                                                                                     |
| Gibbs Free Energy Barrier | kcal/mol | 8.2791023653                                                                      |                                                                                   |                                                                                     |
| Delta G                   | kcal/mol | 6.5407367708                                                                      |                                                                                   |                                                                                     |

**Table S11:** Thermodynamics data of **4c**.

| Structure                 |          | 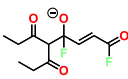 |  |  |
|---------------------------|----------|-----------------------------------------------------------------------------------|------------------------------------------------------------------------------------|-------------------------------------------------------------------------------------|
| ZPE (M05-2X/Gas)          | a.u.     | -927.51047283                                                                     | -927.48943228                                                                      | -927.49774523                                                                       |
| ZPE (M05-2X/SMD)          | a.u.     | -927.58642687                                                                     | -927.56995195                                                                      | -927.58353264                                                                       |
| Solvation delta G         | kJ/mol   | -199.41733990                                                                     | -211.40440146                                                                      | -225.23485546                                                                       |
| ZPE (M06-2X/IEFPCM)       | a.u.     | -926.64158902                                                                     | -926.62399960                                                                      | -926.63855853                                                                       |
| ZPE (double hybrid)       | a.u.     | -926.45512623                                                                     | -926.44719003                                                                      | -926.44313094                                                                       |
| ZPE_corr                  | a.u.     | 0.228632                                                                          | 0.227994                                                                           | 0.228402                                                                            |
| U_corr                    | a.u.     | 0.246846                                                                          | 0.246078                                                                           | 0.246811                                                                            |
| H_corr                    | a.u.     | 0.247790                                                                          | 0.247022                                                                           | 0.247755                                                                            |
| G_corr                    | a.u.     | 0.181024                                                                          | 0.180805                                                                           | 0.179744                                                                            |
| U(T)                      | a.u.     | -926.2082802336                                                                   | -926.2011120265                                                                    | -926.1963199354                                                                     |
| H(T)                      | a.u.     | -926.2073362336                                                                   | -926.2001680265                                                                    | -926.1953759354                                                                     |
| G(T)                      | a.u.     | -926.2741022336                                                                   | -926.2663850265                                                                    | -926.2633869354                                                                     |
| Electron energy barrier   | kJ/mol   | 46.1810117079                                                                     |                                                                                    |                                                                                     |
| Delta electron energy     | kJ/mol   | 7.9565436186                                                                      |                                                                                    |                                                                                     |
| Gibbs Free Energy Barrier | kJ/mol   | 8.2744658598                                                                      |                                                                                    |                                                                                     |
| Delta G                   | kJ/mol   | 2.3154999952                                                                      |                                                                                    |                                                                                     |
| Electron energy barrier   | kcal/mol | 11.0375266988                                                                     |                                                                                    |                                                                                     |
| Delta electron energy     | kcal/mol | 1.9016595647                                                                      |                                                                                    |                                                                                     |
| Gibbs Free Energy Barrier | kcal/mol | 1.9776448040                                                                      |                                                                                    |                                                                                     |
| Delta G                   | kcal/mol | 0.5534177809                                                                      |                                                                                    |                                                                                     |

**Table S12:** Thermodynamics data of **4d**.

| Structure                 |          | 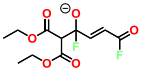 |  |  |
|---------------------------|----------|-----------------------------------------------------------------------------------|------------------------------------------------------------------------------------|-------------------------------------------------------------------------------------|
| ZPE (M05-2X/Gas)          | a.u.     | -1077.95448881                                                                    | -1077.93504835                                                                     | -1077.95278705                                                                      |
| ZPE (M05-2X/SMD)          | a.u.     | -1078.04187319                                                                    | -1078.02706914                                                                     | -1078.04515402                                                                      |
| Solvation delta G         | kJ/mol   | -221.50180817                                                                     | -233.67470263                                                                      | -234.58359821                                                                       |
| ZPE (M06-2X/IEFPCM)       | a.u.     | -1076.95268170                                                                    | -1076.93638945                                                                     | -1076.95551301                                                                      |
| ZPE (double hybrid)       | a.u.     | -1076.75611113                                                                    | -1076.74920663                                                                     | -1076.75433690                                                                      |
| ZPE_corr                  | a.u.     | 0.239682                                                                          | 0.239046                                                                           | 0.240009                                                                            |
| U_corr                    | a.u.     | 0.259826                                                                          | 0.259026                                                                           | 0.260154                                                                            |
| H_corr                    | a.u.     | 0.260770                                                                          | 0.259971                                                                           | 0.261098                                                                            |
| G_corr                    | a.u.     | 0.187998                                                                          | 0.187691                                                                           | 0.187966                                                                            |
| U(T)                      | a.u.     | -1076.51642913                                                                    | -1076.51016063                                                                     | -1076.51432790                                                                      |
| H(T)                      | a.u.     | -1076.49628513                                                                    | -1076.49018063                                                                     | -1076.49418290                                                                      |
| G(T)                      | a.u.     | -1076.49534113                                                                    | -1076.48923563                                                                     | -1076.49323890                                                                      |
| Electron energy barrier   | kJ/mol   | 18.1277526728                                                                     |                                                                                    |                                                                                     |
| Delta electron energy     | kJ/mol   | 4.6582419154                                                                      |                                                                                    |                                                                                     |
| Gibbs Free Energy Barrier | kJ/mol   | 3.8570837171                                                                      |                                                                                    |                                                                                     |
| Delta G                   | kJ/mol   | -7.5623841295                                                                     |                                                                                    |                                                                                     |
| Electron energy barrier   | kcal/mol | 4.3326368721                                                                      |                                                                                    |                                                                                     |
| Delta electron energy     | kcal/mol | 1.1133465381                                                                      |                                                                                    |                                                                                     |
| Gibbs Free Energy Barrier | kcal/mol | 0.9218651332                                                                      |                                                                                    |                                                                                     |
| Delta G                   | kcal/mol | -1.8074531858                                                                     |                                                                                    |                                                                                     |



**Table S13:** Thermodynamics data of **5a**.

| Structure                 |          | 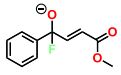 |  |  |
|---------------------------|----------|-----------------------------------------------------------------------------------|------------------------------------------------------------------------------------|-------------------------------------------------------------------------------------|
| ZPE (M05-2X/Gas)          | a.u.     | -750.63874463                                                                     | -750.61920733                                                                      | -750.62814422                                                                       |
| ZPE (M05-2X/SMD)          | a.u.     | -750.73139296                                                                     | -750.71409420                                                                      | -750.72054535                                                                       |
| Solvation delta G         | kJ/mol   | -243.24819567                                                                     | -249.12546931                                                                      | -242.59917732                                                                       |
| ZPE (M06-2X/IEFPCM)       | a.u.     | -749.95917229                                                                     | -749.94190894                                                                      | -749.95127213                                                                       |
| ZPE (double hybrid)       | a.u.     | -749.72275078                                                                     | -749.71672366                                                                      | -749.71178743                                                                       |
| ZPE_corr                  | a.u.     | 0.189722                                                                          | 0.189383                                                                           | 0.190423                                                                            |
| U_corr                    | a.u.     | 0.203663                                                                          | 0.203109                                                                           | 0.204301                                                                            |
| H_corr                    | a.u.     | 0.204607                                                                          | 0.204054                                                                           | 0.205245                                                                            |
| G_corr                    | a.u.     | 0.146643                                                                          | 0.147479                                                                           | 0.147556                                                                            |
| U(T)                      | a.u.     | -749.5190877771                                                                   | -749.5136146611                                                                    | -749.5074864268                                                                     |
| H(T)                      | a.u.     | -749.5181437771                                                                   | -749.5126696611                                                                    | -749.5065424268                                                                     |
| G(T)                      | a.u.     | -749.5761077771                                                                   | -749.5692446611                                                                    | -749.5642314268                                                                     |
| Electron energy barrier   | kJ/mol   | 45.3249490546                                                                     |                                                                                    |                                                                                     |
| Delta electron energy     | kJ/mol   | 20.7418779566                                                                     |                                                                                    |                                                                                     |
| Gibbs Free Energy Barrier | kJ/mol   | 12.1418375729                                                                     |                                                                                    |                                                                                     |
| Delta G                   | kJ/mol   | 31.8303759825                                                                     |                                                                                    |                                                                                     |
| Electron energy barrier   | kcal/mol | 10.8329228142                                                                     |                                                                                    |                                                                                     |
| Delta electron energy     | kcal/mol | 4.9574278099                                                                      |                                                                                    |                                                                                     |
| Gibbs Free Energy Barrier | kcal/mol | 2.9019688272                                                                      |                                                                                    |                                                                                     |
| Delta G                   | kcal/mol | 7.6076424432                                                                      |                                                                                    |                                                                                     |

**Table S14:** Thermodynamics data of **5b**.

| Structure                 |          |                 |                 |                 |
|---------------------------|----------|-----------------|-----------------|-----------------|
| ZPE (M05-2X/Gas)          | a.u.     | -611.84735073   | -611.81770901   | -611.83430188   |
| ZPE (M05-2X/SMD)          | a.u.     | -611.93141632   | -611.89761855   | -611.90810926   |
| Solvation delta G         | kJ/mol   | -220.71418817   | -209.80248939   | -193.78129719   |
| ZPE (M06-2X/IEFPCM)       | a.u.     | -611.31468521   | -611.28208906   | -611.29573608   |
| ZPE (double hybrid)       | a.u.     | -611.16513706   | -611.14762112   | -611.15326412   |
| ZPE_corr                  | a.u.     | 0.106794        | 0.105905        | 0.106944        |
| U_corr                    | a.u.     | 0.117982        | 0.116882        | 0.118163        |
| H_corr                    | a.u.     | 0.118926        | 0.117826        | 0.119107        |
| G_corr                    | a.u.     | 0.068402        | 0.068088        | 0.068414        |
| U(T)                      | a.u.     | -611.0471550619 | -611.0307391231 | -611.0351011198 |
| H(T)                      | a.u.     | -611.0462110619 | -611.0297951231 | -611.0341571198 |
| G(T)                      | a.u.     | -611.0967350619 | -611.0795331231 | -611.0848501198 |
| Electron energy barrier   | kJ/mol   | 85.5811970760   |                 |                 |
| Delta electron energy     | kJ/mol   | 49.7509513169   |                 |                 |
| Gibbs Free Energy Barrier | kJ/mol   | 56.0753891713   |                 |                 |
| Delta G                   | kJ/mol   | 58.1368064560   |                 |                 |
| Electron energy barrier   | kcal/mol | 20.4543970067   |                 |                 |
| Delta electron energy     | kcal/mol | 11.8907627430   |                 |                 |
| Gibbs Free Energy Barrier | kcal/mol | 13.4023396681   |                 |                 |
| Delta G                   | kcal/mol | 13.8950302237   |                 |                 |

**Table S15:** Thermodynamics data of **5c**.

| Structure                 |          | 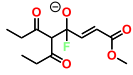 |  |  |
|---------------------------|----------|-----------------------------------------------------------------------------------|------------------------------------------------------------------------------------|-------------------------------------------------------------------------------------|
| ZPE (M05-2X/Gas)          | a.u.     | -942.78720055                                                                     | -942.76201960                                                                      | -942.76666570                                                                       |
| ZPE (M05-2X/SMD)          | a.u.     | -942.86949187                                                                     | -942.84675329                                                                      | -942.85268611                                                                       |
| Solvation delta G         | kJ/mol   | -216.05585541                                                                     | -222.46828472                                                                      | -225.84659433                                                                       |
| ZPE (M06-2X/IEFPCM)       | a.u.     | -941.90492964                                                                     | -941.88171216                                                                      | -941.88953356                                                                       |
| ZPE (double hybrid)       | a.u.     | -941.67969216                                                                     | -941.66538964                                                                      | -941.65971514                                                                       |
| ZPE_corr                  | a.u.     | 0.269361                                                                          | 0.268795                                                                           | 0.269071                                                                            |
| U_corr                    | a.u.     | 0.289493                                                                          | 0.288723                                                                           | 0.289260                                                                            |
| H_corr                    | a.u.     | 0.290437                                                                          | 0.289667                                                                           | 0.290204                                                                            |
| G_corr                    | a.u.     | 0.218930                                                                          | 0.219048                                                                           | 0.218532                                                                            |
| U(T)                      | a.u.     | -941.3901991648                                                                   | -941.3766666421                                                                    | -941.3704551426                                                                     |
| H(T)                      | a.u.     | -941.3892551648                                                                   | -941.3757226421                                                                    | -941.3695111426                                                                     |
| G(T)                      | a.u.     | -941.4607621648                                                                   | -941.4463416421                                                                    | -941.4411831426                                                                     |
| Electron energy barrier   | kJ/mol   | 60.9575016163                                                                     |                                                                                    |                                                                                     |
| Delta electron energy     | kJ/mol   | 40.4224237930                                                                     |                                                                                    |                                                                                     |
| Gibbs Free Energy Barrier | kJ/mol   | 31.4486528316                                                                     |                                                                                    |                                                                                     |
| Delta G                   | kJ/mol   | 41.6139837587                                                                     |                                                                                    |                                                                                     |
| Electron energy barrier   | kcal/mol | 14.5691925469                                                                     |                                                                                    |                                                                                     |
| Delta electron energy     | kcal/mol | 9.6611911551                                                                      |                                                                                    |                                                                                     |
| Gibbs Free Energy Barrier | kcal/mol | 7.5164084205                                                                      |                                                                                    |                                                                                     |
| Delta G                   | kcal/mol | 9.9459808219                                                                      |                                                                                    |                                                                                     |

**Table S16:** Thermodynamics data of **5d**.

| Structure                 |          |  |  |  |
|---------------------------|----------|-----------------------------------------------------------------------------------|------------------------------------------------------------------------------------|-------------------------------------------------------------------------------------|
| ZPE (M05-2X/Gas)          | a.u.     | -1093.23541745                                                                    | -1093.21703788                                                                     | -1093.22141565                                                                      |
| ZPE (M05-2X/SMD)          | a.u.     | -1093.32620128                                                                    | -1093.30693659                                                                     | -1093.30992541                                                                      |
| Solvation delta G         | kJ/mol   | -230.42706414                                                                     | -228.10318159                                                                      | -224.45649336                                                                       |
| ZPE (M06-2X/IEFPCM)       | a.u.     | -1092.21872732                                                                    | -1092.19926659                                                                     | -1092.20354215                                                                      |
| ZPE (double hybrid)       | a.u.     | -1091.98342849                                                                    | -1091.97395352                                                                     | -1091.97002865                                                                      |
| ZPE_corr                  | a.u.     | 0.280642                                                                          | 0.280484                                                                           | 0.281110                                                                            |
| U_corr                    | a.u.     | 0.302395                                                                          | 0.301876                                                                           | 0.302849                                                                            |
| H_corr                    | a.u.     | 0.303339                                                                          | 0.302820                                                                           | 0.303794                                                                            |
| G_corr                    | a.u.     | 0.227779                                                                          | 0.228424                                                                           | 0.228627                                                                            |
| U(T)                      | a.u.     | -1091.70278649                                                                    | -1091.69346952                                                                     | -1091.68891865                                                                      |
| H(T)                      | a.u.     | -1091.68103349                                                                    | -1091.67207752                                                                     | -1091.66717965                                                                      |
| G(T)                      | a.u.     | -1091.68008949                                                                    | -1091.67113352                                                                     | -1091.66623465                                                                      |
| Electron energy barrier   | kJ/mol   | 24.8765350481                                                                     |                                                                                    |                                                                                     |
| Delta electron energy     | kJ/mol   | 35.1812843833                                                                     |                                                                                    |                                                                                     |
| Gibbs Free Energy Barrier | kJ/mol   | 25.8377831078                                                                     |                                                                                    |                                                                                     |
| Delta G                   | kJ/mol   | 42.3464576677                                                                     |                                                                                    |                                                                                     |
| Electron energy barrier   | kcal/mol | 5.9456345717                                                                      |                                                                                    |                                                                                     |
| Delta electron energy     | kcal/mol | 8.4085287723                                                                      |                                                                                    |                                                                                     |
| Gibbs Free Energy Barrier | kcal/mol | 6.1753783718                                                                      |                                                                                    |                                                                                     |
| Delta G                   | kcal/mol | 10.1210462877                                                                     |                                                                                    |                                                                                     |

**Table S17:** Thermodynamics data of **6a**.

| Structure                 |          | 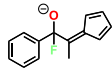 |  |  |
|---------------------------|----------|-----------------------------------------------------------------------------------|-----------------------------------------------------------------------------------|-------------------------------------------------------------------------------------|
| ZPE (M05-2X/Gas)          | a.u.     | -715.69003479                                                                     | -715.66822784                                                                     | -715.70530375                                                                       |
| ZPE (M05-2X/SMD)          | a.u.     | -715.78360009                                                                     | -715.76647625                                                                     | -715.80285238                                                                       |
| Solvation delta G         | kJ/mol   | -245.65569778                                                                     | -257.95121096                                                                     | -256.11392019                                                                       |
| ZPE (M06-2X/IEFPCM)       | a.u.     | -715.03163569                                                                     | -715.01404142                                                                     | -715.05195116                                                                       |
| ZPE (double hybrid)       | a.u.     | -714.73712759                                                                     | -714.73037847                                                                     | -714.75074273                                                                       |
| ZPE_corr                  | a.u.     | 0.220568                                                                          | 0.219353                                                                          | 0.221351                                                                            |
| U_corr                    | a.u.     | 0.234129                                                                          | 0.233243                                                                          | 0.234825                                                                            |
| H_corr                    | a.u.     | 0.235073                                                                          | 0.234187                                                                          | 0.235769                                                                            |
| G_corr                    | a.u.     | 0.179754                                                                          | 0.177338                                                                          | 0.180508                                                                            |
| U(T)                      | a.u.     | -714.5029985877                                                                   | -714.4971354700                                                                   | -714.5159177308                                                                     |
| H(T)                      | a.u.     | -714.5020545877                                                                   | -714.4961914700                                                                   | -714.5149737308                                                                     |
| G(T)                      | a.u.     | -714.5573735877                                                                   | -714.5530404700                                                                   | -714.5702347308                                                                     |
| Electron energy barrier   | kJ/mol   | 46.1937611360                                                                     |                                                                                   |                                                                                     |
| Delta electron energy     | kJ/mol   | -53.3382612338                                                                    |                                                                                   |                                                                                     |
| Gibbs Free Energy Barrier | kJ/mol   | -0.9189126601                                                                     |                                                                                   |                                                                                     |
| Delta G                   | kJ/mol   | -44.2251535957                                                                    |                                                                                   |                                                                                     |
| Electron energy barrier   | kcal/mol | 11.0405738853                                                                     |                                                                                   |                                                                                     |
| Delta electron energy     | kcal/mol | -12.7481503905                                                                    |                                                                                   |                                                                                     |
| Gibbs Free Energy Barrier | kcal/mol | -0.2196253968                                                                     |                                                                                   |                                                                                     |
| Delta G                   | kcal/mol | -10.5700653909                                                                    |                                                                                   |                                                                                     |

**Table S18:** Thermodynamics data of **6b**.

| Structure                 |          |  |  |  |
|---------------------------|----------|-----------------------------------------------------------------------------------|-----------------------------------------------------------------------------------|-------------------------------------------------------------------------------------|
| ZPE (M05-2X/Gas)          | a.u.     | -576.89983504                                                                     | -576.87294478                                                                     | -576.90456606                                                                       |
| ZPE (M05-2X/SMD)          | a.u.     | -576.98538943                                                                     | -576.95822736                                                                     | -576.98834783                                                                       |
| Solvation delta G         | kJ/mol   | -224.62305357                                                                     | -223.90941904                                                                     | -219.96903451                                                                       |
| ZPE (M06-2X/IEFPCM)       | a.u.     | -576.38862738                                                                     | -576.36169199                                                                     | -576.39396370                                                                       |
| ZPE (double hybrid)       | a.u.     | -576.18031749                                                                     | -576.16815301                                                                     | -576.18488782                                                                       |
| ZPE_corr                  | a.u.     | 0.137424                                                                          | 0.136327                                                                          | 0.137380                                                                            |
| U_corr                    | a.u.     | 0.148415                                                                          | 0.147276                                                                          | 0.148438                                                                            |
| H_corr                    | a.u.     | 0.149359                                                                          | 0.148220                                                                          | 0.149382                                                                            |
| G_corr                    | a.u.     | 0.100196                                                                          | 0.099428                                                                          | 0.099994                                                                            |
| U(T)                      | a.u.     | -576.0319024862                                                                   | -576.0208770064                                                                   | -576.0364498156                                                                     |
| H(T)                      | a.u.     | -576.0309584862                                                                   | -576.0199330064                                                                   | -576.0355058156                                                                     |
| G(T)                      | a.u.     | -576.0801214862                                                                   | -576.0687250064                                                                   | -576.0848938156                                                                     |
| Electron energy barrier   | kJ/mol   | 70.7188716961                                                                     |                                                                                   |                                                                                     |
| Delta electron energy     | kJ/mol   | -14.0104976580                                                                    |                                                                                   |                                                                                     |
| Gibbs Free Energy Barrier | kJ/mol   | 30.6350924021                                                                     |                                                                                   |                                                                                     |
| Delta G                   | kJ/mol   | -7.8757318310                                                                     |                                                                                   |                                                                                     |
| Electron energy barrier   | kcal/mol | 16.9022159886                                                                     |                                                                                   |                                                                                     |
| Delta electron energy     | kcal/mol | -3.3485893064                                                                     |                                                                                   |                                                                                     |
| Gibbs Free Energy Barrier | kcal/mol | 7.3219628112                                                                      |                                                                                   |                                                                                     |
| Delta G                   | kcal/mol | -1.8823450839                                                                     |                                                                                   |                                                                                     |

**Table S19:** Thermodynamics data of **6c**.

| Structure                 |          | 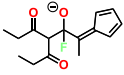 |  |  |
|---------------------------|----------|-----------------------------------------------------------------------------------|------------------------------------------------------------------------------------|-------------------------------------------------------------------------------------|
| ZPE (M05-2X/Gas)          | a.u.     | -907.83848484                                                                     | -907.80445320                                                                      | -907.85476994                                                                       |
| ZPE (M05-2X/SMD)          | a.u.     | -907.92216513                                                                     | -907.90072191                                                                      | -907.94274545                                                                       |
| Solvation delta G         | kJ/mol   | -219.70261190                                                                     | -252.75351123                                                                      | -230.97971463                                                                       |
| ZPE (M06-2X/IEFPCM)       | a.u.     | -906.97901990                                                                     | -906.95474003                                                                      | -907.00042470                                                                       |
| ZPE (double hybrid)       | a.u.     | -906.69438200                                                                     | -906.67764131                                                                      | -906.71080801                                                                       |
| ZPE_corr                  | a.u.     | 0.299891                                                                          | 0.298509                                                                           | 0.299769                                                                            |
| U_corr                    | a.u.     | 0.319771                                                                          | 0.318620                                                                           | 0.319604                                                                            |
| H_corr                    | a.u.     | 0.320715                                                                          | 0.319564                                                                           | 0.320548                                                                            |
| G_corr                    | a.u.     | 0.250720                                                                          | 0.249015                                                                           | 0.251291                                                                            |
| U(T)                      | a.u.     | -906.3746109961                                                                   | -906.3590213090                                                                    | -906.3912040107                                                                     |
| H(T)                      | a.u.     | -906.3736669961                                                                   | -906.3580773090                                                                    | -906.3902600107                                                                     |
| G(T)                      | a.u.     | -906.4436619961                                                                   | -906.4286263090                                                                    | -906.4595170107                                                                     |
| Electron energy barrier   | kJ/mol   | 63.7468118126                                                                     |                                                                                    |                                                                                     |
| Delta electron energy     | kJ/mol   | -56.1982997746                                                                    |                                                                                    |                                                                                     |
| Gibbs Free Energy Barrier | kJ/mol   | 6.4252970143                                                                      |                                                                                    |                                                                                     |
| Delta G                   | kJ/mol   | -52.9044435941                                                                    |                                                                                    |                                                                                     |
| Electron energy barrier   | kcal/mol | 15.2358536837                                                                     |                                                                                    |                                                                                     |
| Delta electron energy     | kcal/mol | -13.4317160073                                                                    |                                                                                    |                                                                                     |
| Gibbs Free Energy Barrier | kcal/mol | 1.5356828428                                                                      |                                                                                    |                                                                                     |
| Delta G                   | kcal/mol | -12.6444654862                                                                    |                                                                                    |                                                                                     |

**Table S20:** Thermodynamics data of **6d**.

| Structure                 |          | 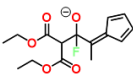 |  |  |
|---------------------------|----------|-----------------------------------------------------------------------------------|------------------------------------------------------------------------------------|-------------------------------------------------------------------------------------|
| ZPE (M05-2X/Gas)          | a.u.     | -1058.28554858                                                                    | -1058.25719733                                                                     | -1058.29263480                                                                      |
| ZPE (M05-2X/SMD)          | a.u.     | -1058.37632514                                                                    | -1058.36010894                                                                     | -1058.39588863                                                                      |
| Solvation delta G         | kJ/mol   | -230.40797676                                                                     | -262.26855053                                                                      | -263.16704914                                                                       |
| ZPE (M06-2X/IEFPCM)       | a.u.     | -1057.29117601                                                                    | -1057.26954247                                                                     | -1057.30594148                                                                      |
| ZPE (double hybrid)       | a.u.     | -1056.99812683                                                                    | -1056.98795906                                                                     | -1057.00547784                                                                      |
| ZPE_corr                  | a.u.     | 0.311097                                                                          | 0.310090                                                                           | 0.311125                                                                            |
| U_corr                    | a.u.     | 0.332678                                                                          | 0.332009                                                                           | 0.333138                                                                            |
| H_corr                    | a.u.     | 0.333622                                                                          | 0.332954                                                                           | 0.334082                                                                            |
| G_corr                    | a.u.     | 0.260325                                                                          | 0.256787                                                                           | 0.257442                                                                            |
| U(T)                      | a.u.     | -1056.68702983                                                                    | -1056.67786906                                                                     | -1056.69435284                                                                      |
| H(T)                      | a.u.     | -1056.66544883                                                                    | -1056.65595006                                                                     | -1056.67233984                                                                      |
| G(T)                      | a.u.     | -1056.66450483                                                                    | -1056.65500506                                                                     | -1056.67139584                                                                      |
| Electron energy barrier   | kJ/mol   | 26.6954790848                                                                     |                                                                                    |                                                                                     |
| Delta electron energy     | kJ/mol   | -19.3000859444                                                                    |                                                                                    |                                                                                     |
| Gibbs Free Energy Barrier | kJ/mol   | -6.9189286902                                                                     |                                                                                    |                                                                                     |
| Delta G                   | kJ/mol   | -50.8514283291                                                                    |                                                                                    |                                                                                     |
| Electron energy barrier   | kcal/mol | 6.38203726302                                                                     |                                                                                    |                                                                                     |
| Delta electron energy     | kcal/mol | -4.6128312487                                                                     |                                                                                    |                                                                                     |
| Gibbs Free Energy Barrier | kcal/mol | -1.6536636449                                                                     |                                                                                    |                                                                                     |
| Delta G                   | kcal/mol | -12.1537830614                                                                    |                                                                                    |                                                                                     |



**Table S21:** Thermodynamics data of **7a**.

| Structure                 |          | 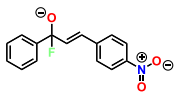 |  |  |
|---------------------------|----------|-----------------------------------------------------------------------------------|------------------------------------------------------------------------------------|-------------------------------------------------------------------------------------|
| ZPE (M05-2X/Gas)          | a.u.     | -958.31044238                                                                     | -958.29389455                                                                      | -958.31190388                                                                       |
| ZPE (M05-2X/SMD)          | a.u.     | -958.40120515                                                                     | -958.38134046                                                                      | -958.39572821                                                                       |
| Solvation delta G         | kJ/mol   | -238.29764476                                                                     | -229.58923933                                                                      | -220.08076529                                                                       |
| ZPE (M06-2X/IEFPCM)       | a.u.     | -957.40705933                                                                     | -957.38798564                                                                      | -957.40505522                                                                       |
| ZPE (double hybrid)       | a.u.     | -957.09813775                                                                     | -957.09473543                                                                      | -957.09692642                                                                       |
| ZPE_corr                  | a.u.     | 0.231354                                                                          | 0.230869                                                                           | 0.231923                                                                            |
| U_corr                    | a.u.     | 0.247868                                                                          | 0.247267                                                                           | 0.248413                                                                            |
| H_corr                    | a.u.     | 0.248812                                                                          | 0.248211                                                                           | 0.249357                                                                            |
| G_corr                    | a.u.     | 0.183799                                                                          | 0.184531                                                                           | 0.185147                                                                            |
| U(T)                      | a.u.     | -956.8502697541                                                                   | -956.8474684274                                                                    | -956.8485134187                                                                     |
| H(T)                      | a.u.     | -956.8493257541                                                                   | -956.8465244274                                                                    | -956.8475694187                                                                     |
| G(T)                      | a.u.     | -956.9143387541                                                                   | -956.9102044274                                                                    | -956.9117794187                                                                     |
| Electron energy barrier   | kJ/mol   | 50.0779757205                                                                     |                                                                                    |                                                                                     |
| Delta electron energy     | kJ/mol   | 5.2617934306                                                                      |                                                                                    |                                                                                     |
| Gibbs Free Energy Barrier | kJ/mol   | 19.5630802052                                                                     |                                                                                    |                                                                                     |
| Delta G                   | kJ/mol   | 24.9364144587                                                                     |                                                                                    |                                                                                     |
| Electron energy barrier   | kcal/mol | 11.9689234514                                                                     |                                                                                    |                                                                                     |
| Delta electron energy     | kcal/mol | 1.2575988123                                                                      |                                                                                    |                                                                                     |
| Gibbs Free Energy Barrier | kcal/mol | 4.6756883856                                                                      |                                                                                    |                                                                                     |
| Delta G                   | kcal/mol | 5.9599460943                                                                      |                                                                                    |                                                                                     |

**Table S22:** Thermodynamics data of **7b**.

| Structure                 |          | 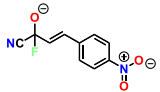 |  |  |
|---------------------------|----------|-----------------------------------------------------------------------------------|------------------------------------------------------------------------------------|-------------------------------------------------------------------------------------|
| ZPE (M05-2X/Gas)          | a.u.     | -819.51843190                                                                     | -819.49080259                                                                      | -819.50418650                                                                       |
| ZPE (M05-2X/SMD)          | a.u.     | -819.60243625                                                                     | -819.56425749                                                                      | -819.57469326                                                                       |
| Solvation delta G         | kJ/mol   | -220.55342092                                                                     | -192.85583995                                                                      | -185.11549575                                                                       |
| ZPE (M06-2X/IEFPCM)       | a.u.     | -818.76359573                                                                     | -818.72718693                                                                      | -818.74096441                                                                       |
| ZPE (double hybrid)       | a.u.     | -818.53990141                                                                     | -818.52440278                                                                      | -818.52502342                                                                       |
| ZPE_corr                  | a.u.     | 0.148436                                                                          | 0.147102                                                                           | 0.148115                                                                            |
| U_corr                    | a.u.     | 0.162236                                                                          | 0.160838                                                                           | 0.161985                                                                            |
| H_corr                    | a.u.     | 0.163180                                                                          | 0.161782                                                                           | 0.162929                                                                            |
| G_corr                    | a.u.     | 0.105222                                                                          | 0.104295                                                                           | 0.105022                                                                            |
| U(T)                      | a.u.     | -818.3776654063                                                                   | -818.3635647805                                                                    | -818.3630384209                                                                     |
| H(T)                      | a.u.     | -818.3767214063                                                                   | -818.3626207805                                                                    | -818.3620944209                                                                     |
| G(T)                      | a.u.     | -818.4346794063                                                                   | -818.4201077805                                                                    | -818.4200014209                                                                     |
| Electron energy barrier   | kJ/mol   | 95.5912833959                                                                     |                                                                                    |                                                                                     |
| Delta electron energy     | kJ/mol   | 59.4185175322                                                                     |                                                                                    |                                                                                     |
| Gibbs Free Energy Barrier | kJ/mol   | 65.9553844339                                                                     |                                                                                    |                                                                                     |
| Delta G                   | kJ/mol   | 73.9749756541                                                                     |                                                                                    |                                                                                     |
| Electron energy barrier   | kcal/mol | 22.8468650564                                                                     |                                                                                    |                                                                                     |
| Delta electron energy     | kcal/mol | 14.2013665230                                                                     |                                                                                    |                                                                                     |
| Gibbs Free Energy Barrier | kcal/mol | 15.7637152089                                                                     |                                                                                    |                                                                                     |
| Delta G                   | kcal/mol | 17.6804435120                                                                     |                                                                                    |                                                                                     |

**Table S23:** Thermodynamics data of **7c**.

| Structure                 |          | 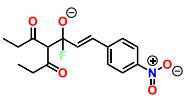 |  |  |
|---------------------------|----------|-----------------------------------------------------------------------------------|------------------------------------------------------------------------------------|-------------------------------------------------------------------------------------|
| ZPE (M05-2X/Gas)          | a.u.     | -1150.44582947                                                                    | -1150.42008243                                                                     | -1150.45157351                                                                      |
| ZPE (M05-2X/SMD)          | a.u.     | -1150.53319156                                                                    | -1150.50602357                                                                     | -1150.53026408                                                                      |
| Solvation delta G         | kJ/mol   | -229.36916729                                                                     | -225.63846307                                                                      | -206.60209154                                                                       |
| ZPE (M06-2X/IEFPCM)       | a.u.     | -1149.34665881                                                                    | -1149.31793590                                                                     | -1149.34458950                                                                      |
| ZPE (double hybrid)       | a.u.     | -1149.04492995                                                                    | -1149.03230891                                                                     | -1149.04799946                                                                      |
| ZPE_corr                  | a.u.     | 0.310811                                                                          | 0.309574                                                                           | 0.310465                                                                            |
| U_corr                    | a.u.     | 0.333532                                                                          | 0.332353                                                                           | 0.333515                                                                            |
| H_corr                    | a.u.     | 0.334476                                                                          | 0.333297                                                                           | 0.334459                                                                            |
| G_corr                    | a.u.     | 0.255624                                                                          | 0.254536                                                                           | 0.254297                                                                            |
| U(T)                      | a.u.     | -1148.7113979479                                                                  | -1148.6999559091                                                                   | -1148.7144844630                                                                    |
| H(T)                      | a.u.     | -1148.7104539479                                                                  | -1148.6990119091                                                                   | -1148.7135404630                                                                    |
| G(T)                      | a.u.     | -1148.7893059479                                                                  | -1148.7777729091                                                                   | -1148.7937024630                                                                    |
| Electron energy barrier   | kJ/mol   | 75.4120002048                                                                     |                                                                                    |                                                                                     |
| Delta electron energy     | kJ/mol   | 5.4329734051                                                                      |                                                                                    |                                                                                     |
| Gibbs Free Energy Barrier | kJ/mol   | 34.0106975946                                                                     |                                                                                    |                                                                                     |
| Delta G                   | kJ/mol   | 11.2240253647                                                                     |                                                                                    |                                                                                     |
| Electron energy barrier   | kcal/mol | 18.0239006226                                                                     |                                                                                    |                                                                                     |
| Delta electron energy     | kcal/mol | 1.2985118081                                                                      |                                                                                    |                                                                                     |
| Gibbs Free Energy Barrier | kcal/mol | 8.1287518151                                                                      |                                                                                    |                                                                                     |
| Delta G                   | kcal/mol | 2.6826064447                                                                      |                                                                                    |                                                                                     |

**Table S24:** Thermodynamics data of **7d**.

| Structure                 |          | 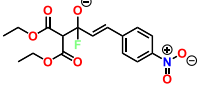 |  |  |
|---------------------------|----------|-----------------------------------------------------------------------------------|------------------------------------------------------------------------------------|-------------------------------------------------------------------------------------|
| ZPE (M05-2X/Gas)          | a.u.     | -1300.89591909                                                                    | -1300.87817896                                                                     | -1300.89844489                                                                      |
| ZPE (M05-2X/SMD)          | a.u.     | -1300.99293952                                                                    | -1300.97060992                                                                     | -1300.98670619                                                                      |
| Solvation delta G         | kJ/mol   | -246.80125744                                                                     | -234.75160396                                                                      | -223.80416163                                                                       |
| ZPE (M06-2X/IEFPCM)       | a.u.     | -1299.66249716                                                                    | -1299.63810922                                                                     | -1299.65613739                                                                      |
| ZPE (double hybrid)       | a.u.     | -1299.35089815                                                                    | -1299.34604564                                                                     | -1299.35111701                                                                      |
| ZPE_corr                  | a.u.     | 0.321569                                                                          | 0.320573                                                                           | 0.321756                                                                            |
| U_corr                    | a.u.     | 0.346474                                                                          | 0.345497                                                                           | 0.346679                                                                            |
| H_corr                    | a.u.     | 0.347419                                                                          | 0.346441                                                                           | 0.347623                                                                            |
| G_corr                    | a.u.     | 0.261145                                                                          | 0.260869                                                                           | 0.261959                                                                            |
| U(T)                      | a.u.     | -1299.02932915                                                                    | -1299.02547264                                                                     | -1299.02936101                                                                      |
| H(T)                      | a.u.     | -1299.00442415                                                                    | -1299.00054864                                                                     | -1299.00443801                                                                      |
| G(T)                      | a.u.     | -1299.00347915                                                                    | -1298.99960464                                                                     | -1299.00349401                                                                      |
| Electron energy barrier   | kJ/mol   | 12.7402516152                                                                     |                                                                                    |                                                                                     |
| Delta electron energy     | kJ/mol   | -0.5746156170                                                                     |                                                                                    |                                                                                     |
| Gibbs Free Energy Barrier | kJ/mol   | 22.2221660999                                                                     |                                                                                    |                                                                                     |
| Delta G                   | kJ/mol   | 22.9580821985                                                                     |                                                                                    |                                                                                     |
| Electron energy barrier   | kcal/mol | 3.0449932159                                                                      |                                                                                    |                                                                                     |
| Delta electron energy     | kcal/mol | -0.1373364285                                                                     |                                                                                    |                                                                                     |
| Gibbs Free Energy Barrier | kcal/mol | 5.3112251673                                                                      |                                                                                    |                                                                                     |
| Delta G                   | kcal/mol | 5.4871133362                                                                      |                                                                                    |                                                                                     |

**Table S25:** Thermodynamics data of **8a**.

| Structure                 |          | 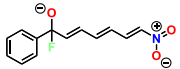 |  |  |
|---------------------------|----------|-----------------------------------------------------------------------------------|------------------------------------------------------------------------------------|-------------------------------------------------------------------------------------|
| ZPE (M05-2X/Gas)          | a.u.     | -882.05992673                                                                     | -882.04545318                                                                      | -882.07584655                                                                       |
| ZPE (M05-2X/SMD)          | a.u.     | -882.14887858                                                                     | -882.13309857                                                                      | -882.16351757                                                                       |
| Solvation delta G         | kJ/mol   | -233.54307955                                                                     | -230.11296882                                                                      | -230.18028139                                                                       |
| ZPE (M06-2X/IEFPCM)       | a.u.     | -881.23470376                                                                     | -881.21890475                                                                      | -881.25258121                                                                       |
| ZPE (double hybrid)       | a.u.     | -880.97135603                                                                     | -880.97077692                                                                      | -880.98254552                                                                       |
| ZPE_corr                  | a.u.     | 0.216981                                                                          | 0.216385                                                                           | 0.218029                                                                            |
| U_corr                    | a.u.     | 0.233300                                                                          | 0.232560                                                                           | 0.234258                                                                            |
| H_corr                    | a.u.     | 0.234244                                                                          | 0.233504                                                                           | 0.235202                                                                            |
| G_corr                    | a.u.     | 0.169855                                                                          | 0.170090                                                                           | 0.170757                                                                            |
| U(T)                      | a.u.     | -880.7380560256                                                                   | -880.7382169220                                                                    | -880.7482875181                                                                     |
| H(T)                      | a.u.     | -880.7371120256                                                                   | -880.7372729220                                                                    | -880.7473435181                                                                     |
| G(T)                      | a.u.     | -880.8015010256                                                                   | -880.8006869220                                                                    | -880.8117885181                                                                     |
| Electron energy barrier   | kJ/mol   | 41.4803007551                                                                     |                                                                                    |                                                                                     |
| Delta electron energy     | kJ/mol   | -46.9372397238                                                                    |                                                                                    |                                                                                     |
| Gibbs Free Energy Barrier | kJ/mol   | 5.5675397052                                                                      |                                                                                    |                                                                                     |
| Delta G                   | kJ/mol   | -23.6470134242                                                                    |                                                                                    |                                                                                     |
| Electron energy barrier   | kcal/mol | 9.9140298172                                                                      |                                                                                    |                                                                                     |
| Delta electron energy     | kcal/mol | -11.2182695325                                                                    |                                                                                    |                                                                                     |
| Gibbs Free Energy Barrier | kcal/mol | 1.3306739257                                                                      |                                                                                    |                                                                                     |
| Delta G                   | kcal/mol | -5.6517718509                                                                     |                                                                                    |                                                                                     |

**Table S26:** Thermodynamics data of **8b**.

| Structure                 |          | 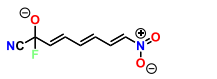 |  |  |
|---------------------------|----------|-----------------------------------------------------------------------------------|------------------------------------------------------------------------------------|-------------------------------------------------------------------------------------|
| ZPE (M05-2X/Gas)          | a.u.     | -743.26696293                                                                     | -743.24463094                                                                      | -743.26688095                                                                       |
| ZPE (M05-2X/SMD)          | a.u.     | -743.34969492                                                                     | -743.31744649                                                                      | -743.34144192                                                                       |
| Solvation delta G         | kJ/mol   | -217.21283449                                                                     | -191.17722915                                                                      | -195.75981623                                                                       |
| ZPE (M06-2X/IEFPCM)       | a.u.     | -742.59080178                                                                     | -742.55981762                                                                      | -742.58729719                                                                       |
| ZPE (double hybrid)       | a.u.     | -742.41250562                                                                     | -742.40257380                                                                      | -742.40911465                                                                       |
| ZPE_corr                  | a.u.     | 0.134085                                                                          | 0.132869                                                                           | 0.134256                                                                            |
| U_corr                    | a.u.     | 0.147705                                                                          | 0.146309                                                                           | 0.147860                                                                            |
| H_corr                    | a.u.     | 0.148649                                                                          | 0.147253                                                                           | 0.148804                                                                            |
| G_corr                    | a.u.     | 0.091138                                                                          | 0.090470                                                                           | 0.090324                                                                            |
| U(T)                      | a.u.     | -742.2648006244                                                                   | -742.2562647966                                                                    | -742.2612546501                                                                     |
| H(T)                      | a.u.     | -742.2638566244                                                                   | -742.2553207966                                                                    | -742.2603106501                                                                     |
| G(T)                      | a.u.     | -742.3213676244                                                                   | -742.3121037966                                                                    | -742.3187906501                                                                     |
| Electron energy barrier   | kJ/mol   | 81.3489094545                                                                     |                                                                                    |                                                                                     |
| Delta electron energy     | kJ/mol   | 9.2012957941                                                                      |                                                                                    |                                                                                     |
| Gibbs Free Energy Barrier | kJ/mol   | 50.3577851798                                                                     |                                                                                    |                                                                                     |
| Delta G                   | kJ/mol   | 28.2188640755                                                                     |                                                                                    |                                                                                     |
| Electron energy barrier   | kcal/mol | 19.4428559882                                                                     |                                                                                    |                                                                                     |
| Delta electron energy     | kcal/mol | 2.1991624747                                                                      |                                                                                    |                                                                                     |
| Gibbs Free Energy Barrier | kcal/mol | 12.0357995171                                                                     |                                                                                    |                                                                                     |
| Delta G                   | kcal/mol | 6.7444703813                                                                      |                                                                                    |                                                                                     |

**Table S27:** Thermodynamics data of **8c**.

| Structure                 |          | 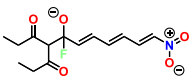 |  |  |
|---------------------------|----------|-----------------------------------------------------------------------------------|------------------------------------------------------------------------------------|-------------------------------------------------------------------------------------|
| ZPE (M05-2X/Gas)          | a.u.     | -1074.20712402                                                                    | -1074.18855154                                                                     | -1074.20765763                                                                      |
| ZPE (M05-2X/SMD)          | a.u.     | -1074.28735515                                                                    | -1074.26678220                                                                     | -1074.29330249                                                                      |
| Solvation delta G         | kJ/mol   | -210.64683181                                                                     | -205.39459783                                                                      | -224.86057993                                                                       |
| ZPE (M06-2X/IEFPCM)       | a.u.     | -1073.18074965                                                                    | -1073.15973593                                                                     | -1073.18708571                                                                      |
| ZPE (double hybrid)       | a.u.     | -1072.92739367                                                                    | -1072.92089936                                                                     | -1072.92533220                                                                      |
| ZPE_corr                  | a.u.     | 0.296843                                                                          | 0.295883                                                                           | 0.296761                                                                            |
| U_corr                    | a.u.     | 0.319318                                                                          | 0.318212                                                                           | 0.319362                                                                            |
| H_corr                    | a.u.     | 0.320262                                                                          | 0.319156                                                                           | 0.320307                                                                            |
| G_corr                    | a.u.     | 0.242169                                                                          | 0.241926                                                                           | 0.241373                                                                            |
| U(T)                      | a.u.     | -1072.6080756684                                                                  | -1072.6026873575                                                                   | -1072.6059701956                                                                    |
| H(T)                      | a.u.     | -1072.6071316684                                                                  | -1072.6017433575                                                                   | -1072.6050251956                                                                    |
| G(T)                      | a.u.     | -1072.6852246684                                                                  | -1072.6789733575                                                                   | -1072.6839591956                                                                    |
| Electron energy barrier   | kJ/mol   | 55.1715218604                                                                     |                                                                                    |                                                                                     |
| Delta electron energy     | kJ/mol   | -16.6353255299                                                                    |                                                                                    |                                                                                     |
| Gibbs Free Energy Barrier | kJ/mol   | 21.6650507520                                                                     |                                                                                    |                                                                                     |
| Delta G                   | kJ/mol   | -10.8912492788                                                                    |                                                                                    |                                                                                     |
| Electron energy barrier   | kcal/mol | 13.1863101961                                                                     |                                                                                    |                                                                                     |
| Delta electron energy     | kcal/mol | -3.9759382242                                                                     |                                                                                    |                                                                                     |
| Gibbs Free Energy Barrier | kcal/mol | 5.1780714034                                                                      |                                                                                    |                                                                                     |
| Delta G                   | kcal/mol | -2.6030710513                                                                     |                                                                                    |                                                                                     |

**Table S28:** Thermodynamics data of **8d**.

| Structure                 |          | 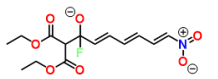 |  |  |
|---------------------------|----------|-----------------------------------------------------------------------------------|------------------------------------------------------------------------------------|-------------------------------------------------------------------------------------|
| ZPE (M05-2X/Gas)          | a.u.     | -1224.65449847                                                                    | -1224.64168994                                                                     | -1224.66222816                                                                      |
| ZPE (M05-2X/SMD)          | a.u.     | -1224.74335238                                                                    | -1224.72650648                                                                     | -1224.74916345                                                                      |
| Solvation delta G         | kJ/mol   | -225.36005919                                                                     | -214.75994425                                                                      | -220.32272237                                                                       |
| ZPE (M06-2X/IEFPCM)       | a.u.     | -1223.49267773                                                                    | -1223.47574655                                                                     | -1223.50002036                                                                      |
| ZPE (double hybrid)       | a.u.     | -1223.23129894                                                                    | -1223.22885352                                                                     | -1223.23668449                                                                      |
| ZPE_corr                  | a.u.     | 0.307209                                                                          | 0.307016                                                                           | 0.308211                                                                            |
| U_corr                    | a.u.     | 0.331846                                                                          | 0.331204                                                                           | 0.332770                                                                            |
| H_corr                    | a.u.     | 0.332790                                                                          | 0.332148                                                                           | 0.333714                                                                            |
| G_corr                    | a.u.     | 0.248030                                                                          | 0.249082                                                                           | 0.248431                                                                            |
| U(T)                      | a.u.     | -1222.92408994                                                                    | -1222.92183752                                                                     | -1222.92847349                                                                      |
| H(T)                      | a.u.     | -1222.89945294                                                                    | -1222.89764952                                                                     | -1222.90391449                                                                      |
| G(T)                      | a.u.     | -1222.89850894                                                                    | -1222.89670552                                                                     | -1222.90297049                                                                      |
| Electron energy barrier   | kJ/mol   | 6.4204478471                                                                      |                                                                                    |                                                                                     |
| Delta electron energy     | kJ/mol   | -14.1397565362                                                                    |                                                                                    |                                                                                     |
| Gibbs Free Energy Barrier | kJ/mol   | 15.3349917830                                                                     |                                                                                    |                                                                                     |
| Delta G                   | kJ/mol   | -6.6764577252                                                                     |                                                                                    |                                                                                     |
| Electron energy barrier   | kcal/mol | 1.5345238640                                                                      |                                                                                    |                                                                                     |
| Delta electron energy     | kcal/mol | -3.3794829197                                                                     |                                                                                    |                                                                                     |
| Gibbs Free Energy Barrier | kcal/mol | 3.6651509998                                                                      |                                                                                    |                                                                                     |
| Delta G                   | kcal/mol | -1.5957116934                                                                     |                                                                                    |                                                                                     |



**Table S29:** Thermodynamics data of **9**.

| Structure                 |          |  |  |  |
|---------------------------|----------|-----------------------------------------------------------------------------------|------------------------------------------------------------------------------------|-------------------------------------------------------------------------------------|
| ZPE (M05-2X/Gas)          | a.u.     | -1357.74457429                                                                    | -1357.74133853                                                                     | -1357.81273772                                                                      |
| ZPE (M05-2X/SMD)          | a.u.     | -1357.78412234                                                                    | -1357.77664905                                                                     | -1357.83298395                                                                      |
| Solvation delta G         | kJ/mol   | -103.83340528                                                                     | -92.70777026                                                                       | -53.15647686                                                                        |
| ZPE (M06-2X/IEFPCM)       | a.u.     | -1356.95833716                                                                    | -1356.94925632                                                                     | -1357.01051035                                                                      |
| ZPE (double hybrid)       | a.u.     | -1356.47835761                                                                    | -1356.48126075                                                                     | -1356.53761190                                                                      |
| ZPE_corr                  | a.u.     | 0.168913                                                                          | 0.168258                                                                           | 0.170567                                                                            |
| U_corr                    | a.u.     | 0.181480                                                                          | 0.180494                                                                           | 0.182964                                                                            |
| H_corr                    | a.u.     | 0.182424                                                                          | 0.181438                                                                           | 0.183908                                                                            |
| G_corr                    | a.u.     | 0.128096                                                                          | 0.128819                                                                           | 0.130577                                                                            |
| U(T)                      | a.u.     | -1356.2968776118                                                                  | -1356.3007667498                                                                   | -1356.3546479026                                                                    |
| H(T)                      | a.u.     | -1356.2959336118                                                                  | -1356.2998227498                                                                   | -1356.3537039026                                                                    |
| G(T)                      | a.u.     | -1356.3502616118                                                                  | -1356.3524417498                                                                   | -1356.4070349026                                                                    |
| Electron energy barrier   | kJ/mol   | 23.8417454201                                                                     |                                                                                    |                                                                                     |
| Delta electron energy     | kJ/mol   | -136.9807103452                                                                   |                                                                                    |                                                                                     |
| Gibbs Free Energy Barrier | kJ/mol   | 5.4016826963                                                                      |                                                                                    |                                                                                     |
| Delta G                   | kJ/mol   | -98.3813465849                                                                    |                                                                                    |                                                                                     |
| Electron energy barrier   | kcal/mol | 5.6983139149                                                                      |                                                                                    |                                                                                     |
| Delta electron energy     | kcal/mol | -32.7391755127                                                                    |                                                                                    |                                                                                     |
| Gibbs Free Energy Barrier | kcal/mol | 1.2910331492                                                                      |                                                                                    |                                                                                     |
| Delta G                   | kcal/mol | -23.5137061627                                                                    |                                                                                    |                                                                                     |

**Table S30:** Thermodynamics data of **10**.

| Structure                 |          | 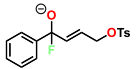 |  |  |
|---------------------------|----------|-----------------------------------------------------------------------------------|------------------------------------------------------------------------------------|-------------------------------------------------------------------------------------|
| ZPE (M05-2X/Gas)          | a.u.     | -1456.18025554                                                                    | -1456.15891727                                                                     | -1456.22121279                                                                      |
| ZPE (M05-2X/SMD)          | a.u.     | -1456.28243499                                                                    | -1456.25395433                                                                     | -1456.31894241                                                                      |
| Solvation delta G         | kJ/mol   | -268.27214597                                                                     | -249.51980103                                                                      | -256.58911731                                                                       |
| ZPE (M06-2X/IEFPCM)       | a.u.     | -1455.05556727                                                                    | -1455.02741334                                                                     | -1455.09348801                                                                      |
| ZPE (double hybrid)       | a.u.     | -1454.62700406                                                                    | -1454.61016369                                                                     | -1454.66983141                                                                      |
| ZPE_corr                  | a.u.     | 0.300107                                                                          | 0.297937                                                                           | 0.299045                                                                            |
| U_corr                    | a.u.     | 0.320842                                                                          | 0.319076                                                                           | 0.320968                                                                            |
| H_corr                    | a.u.     | 0.321786                                                                          | 0.320020                                                                           | 0.321912                                                                            |
| G_corr                    | a.u.     | 0.249617                                                                          | 0.245971                                                                           | 0.246350                                                                            |
| U(T)                      | a.u.     | -1454.3061620584                                                                  | -1454.2910876921                                                                   | -1454.3488634098                                                                    |
| H(T)                      | a.u.     | -1454.3052180584                                                                  | -1454.2901436921                                                                   | -1454.3479194098                                                                    |
| G(T)                      | a.u.     | -1454.3773870584                                                                  | -1454.3641926921                                                                   | -1454.4234814098                                                                    |
| Electron energy barrier   | kJ/mol   | 73.9181432148                                                                     |                                                                                    |                                                                                     |
| Delta electron energy     | kJ/mol   | -99.5609028703                                                                    |                                                                                    |                                                                                     |
| Gibbs Free Energy Barrier | kJ/mol   | 53.3941536660                                                                     |                                                                                    |                                                                                     |
| Delta G                   | kJ/mol   | -109.3376909364                                                                   |                                                                                    |                                                                                     |
| Electron energy barrier   | kcal/mol | 17.6668602330                                                                     |                                                                                    |                                                                                     |
| Delta electron energy     | kcal/mol | -23.7956268810                                                                    |                                                                                    |                                                                                     |
| Gibbs Free Energy Barrier | kcal/mol | 12.7615090024                                                                     |                                                                                    |                                                                                     |
| Delta G                   | kcal/mol | -26.1323353098                                                                    |                                                                                    |                                                                                     |

**Table S31:** Thermodynamics data of **11**.

| Structure                 |          |  |  |  |
|---------------------------|----------|-----------------------------------------------------------------------------------|------------------------------------------------------------------------------------|-------------------------------------------------------------------------------------|
| ZPE (M05-2X/Gas)          | a.u.     | -675.36428796                                                                     | -675.32334719                                                                      | -675.33387056                                                                       |
| ZPE (M05-2X/SMD)          | a.u.     | -675.46050310                                                                     | -675.41952465                                                                      | -675.42343400                                                                       |
| Solvation delta G         | kJ/mol   | -252.61285007                                                                     | -252.51390810                                                                      | -235.14880909                                                                       |
| ZPE (M06-2X/IEFPCM)       | a.u.     | -674.76002570                                                                     | -674.71944557                                                                      | -674.72503811                                                                       |
| ZPE (double hybrid)       | a.u.     | -674.51840099                                                                     | -674.48798625                                                                      | -674.49120860                                                                       |
| ZPE_corr                  | a.u.     | 0.184936                                                                          | 0.183696                                                                           | 0.184313                                                                            |
| U_corr                    | a.u.     | 0.197280                                                                          | 0.195860                                                                           | 0.196791                                                                            |
| H_corr                    | a.u.     | 0.198225                                                                          | 0.196804                                                                           | 0.197735                                                                            |
| G_corr                    | a.u.     | 0.144480                                                                          | 0.143798                                                                           | 0.144574                                                                            |
| U(T)                      | a.u.     | -674.3211209945                                                                   | -674.2921262543                                                                    | -674.2944175999                                                                     |
| H(T)                      | a.u.     | -674.3201759945                                                                   | -674.2911822543                                                                    | -674.2934735999                                                                     |
| G(T)                      | a.u.     | -674.3739209945                                                                   | -674.3441882543                                                                    | -674.3466345999                                                                     |
| Electron energy barrier   | kJ/mol   | 106.5431313149                                                                    |                                                                                    |                                                                                     |
| Delta electron energy     | kJ/mol   | 91.8599201702                                                                     |                                                                                    |                                                                                     |
| Gibbs Free Energy Barrier | kJ/mol   | 78.1622512310                                                                     |                                                                                    |                                                                                     |
| Delta G                   | kJ/mol   | 89.1044698927                                                                     |                                                                                    |                                                                                     |
| Electron energy barrier   | kcal/mol | 25.4644195303                                                                     |                                                                                    |                                                                                     |
| Delta electron energy     | kcal/mol | 21.9550478418                                                                     |                                                                                    |                                                                                     |
| Gibbs Free Energy Barrier | kcal/mol | 18.6812263936                                                                     |                                                                                    |                                                                                     |
| Delta G                   | kcal/mol | 21.2964794199                                                                     |                                                                                    |                                                                                     |

**Table S32:** Thermodynamics data of **12**.

| Structure                 |          | 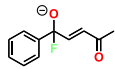 |  |  |
|---------------------------|----------|-----------------------------------------------------------------------------------|------------------------------------------------------------------------------------|-------------------------------------------------------------------------------------|
| ZPE (M05-2X/Gas)          | a.u.     | -675.41565096                                                                     | -675.39683417                                                                      | -675.40284407                                                                       |
| ZPE (M05-2X/SMD)          | a.u.     | -675.50814591                                                                     | -675.49110688                                                                      | -675.49802901                                                                       |
| Solvation delta G         | kJ/mol   | -242.84548860                                                                     | -247.51299485                                                                      | -249.90805472                                                                       |
| ZPE (M06-2X/IEFPCM)       | a.u.     | -674.80661064                                                                     | -674.78993452                                                                      | -674.79921483                                                                       |
| ZPE (double hybrid)       | a.u.     | -674.57280341                                                                     | -674.56836270                                                                      | -674.56036238                                                                       |
| ZPE_corr                  | a.u.     | 0.183831                                                                          | 0.183561                                                                           | 0.184502                                                                            |
| U_corr                    | a.u.     | 0.196761                                                                          | 0.196354                                                                           | 0.197519                                                                            |
| H_corr                    | a.u.     | 0.197705                                                                          | 0.197298                                                                           | 0.198463                                                                            |
| G_corr                    | a.u.     | 0.143012                                                                          | 0.143239                                                                           | 0.143158                                                                            |
| U(T)                      | a.u.     | -674.3760424146                                                                   | -674.3720086954                                                                    | -674.3628433809                                                                     |
| H(T)                      | a.u.     | -674.3750984146                                                                   | -674.3710646954                                                                    | -674.3618993809                                                                     |
| G(T)                      | a.u.     | -674.4297914146                                                                   | -674.4251236954                                                                    | -674.4172043809                                                                     |
| Electron energy barrier   | kJ/mol   | 43.7831530601                                                                     |                                                                                    |                                                                                     |
| Delta electron energy     | kJ/mol   | 19.4176860275                                                                     |                                                                                    |                                                                                     |
| Gibbs Free Energy Barrier | kJ/mol   | 7.5875906628                                                                      |                                                                                    |                                                                                     |
| Delta G                   | kJ/mol   | 25.9846909649                                                                     |                                                                                    |                                                                                     |
| Electron energy barrier   | kcal/mol | 10.4644247276                                                                     |                                                                                    |                                                                                     |
| Delta electron energy     | kcal/mol | 4.6409383431                                                                      |                                                                                    |                                                                                     |
| Gibbs Free Energy Barrier | kcal/mol | 1.8134776919                                                                      |                                                                                    |                                                                                     |
| Delta G                   | kcal/mol | 6.2104901924                                                                      |                                                                                    |                                                                                     |

**Table S33:** Thermodynamics data of **13**.

| Structure                 |          | 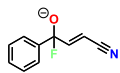 |  |  |
|---------------------------|----------|-----------------------------------------------------------------------------------|------------------------------------------------------------------------------------|-------------------------------------------------------------------------------------|
| ZPE (M05-2X/Gas)          | a.u.     | -615.03725154                                                                     | -615.01487205                                                                      | -615.01941068                                                                       |
| ZPE (M05-2X/SMD)          | a.u.     | -615.12299382                                                                     | -615.10698718                                                                      | -615.11476645                                                                       |
| Solvation delta G         | kJ/mol   | -225.11635089                                                                     | -241.84827119                                                                      | -250.35658201                                                                       |
| ZPE (M06-2X/IEFPCM)       | a.u.     | -614.48523640                                                                     | -614.46856040                                                                      | -614.47618131                                                                       |
| ZPE (double hybrid)       | a.u.     | -614.25651510                                                                     | -614.24849566                                                                      | -614.23944199                                                                       |
| ZPE_corr                  | a.u.     | 0.145017                                                                          | 0.144696                                                                           | 0.145599                                                                            |
| U_corr                    | a.u.     | 0.156176                                                                          | 0.155738                                                                           | 0.156912                                                                            |
| H_corr                    | a.u.     | 0.157120                                                                          | 0.156683                                                                           | 0.157856                                                                            |
| G_corr                    | a.u.     | 0.106797                                                                          | 0.106835                                                                           | 0.106892                                                                            |
| U(T)                      | a.u.     | -614.1003391044                                                                   | -614.0927576628                                                                    | -614.0825299920                                                                     |
| H(T)                      | a.u.     | -614.0993951044                                                                   | -614.0918126628                                                                    | -614.0815859920                                                                     |
| G(T)                      | a.u.     | -614.1497181044                                                                   | -614.1416606628                                                                    | -614.1325499920                                                                     |
| Electron energy barrier   | kJ/mol   | 43.7828511276                                                                     |                                                                                    |                                                                                     |
| Delta electron energy     | kJ/mol   | 23.7741492970                                                                     |                                                                                    |                                                                                     |
| Gibbs Free Energy Barrier | kJ/mol   | 4.4228926732                                                                      |                                                                                    |                                                                                     |
| Delta G                   | kJ/mol   | 19.8346479313                                                                     |                                                                                    |                                                                                     |
| Electron energy barrier   | kcal/mol | 10.4643525639                                                                     |                                                                                    |                                                                                     |
| Delta electron energy     | kcal/mol | 5.6821580538                                                                      |                                                                                    |                                                                                     |
| Gibbs Free Energy Barrier | kcal/mol | 1.0570967192                                                                      |                                                                                    |                                                                                     |
| Delta G                   | kcal/mol | 4.7405946298                                                                      |                                                                                    |                                                                                     |

**Table S34:** Thermodynamics data of **14**.

| Structure                 |          | 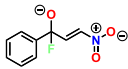 |  |  |
|---------------------------|----------|-----------------------------------------------------------------------------------|------------------------------------------------------------------------------------|-------------------------------------------------------------------------------------|
| ZPE (M05-2X/Gas)          | a.u.     | -727.27302562                                                                     | -727.25567090                                                                      | -727.27318961                                                                       |
| ZPE (M05-2X/SMD)          | a.u.     | -727.35662817                                                                     | -727.34395271                                                                      | -727.36520349                                                                       |
| Solvation delta G         | kJ/mol   | -219.49851340                                                                     | -231.78389216                                                                      | -241.58243406                                                                       |
| ZPE (M06-2X/IEFPCM)       | a.u.     | -726.61188159                                                                     | -726.59830028                                                                      | -726.62275786                                                                       |
| ZPE (double hybrid)       | a.u.     | -726.41458600                                                                     | -726.41116321                                                                      | -726.41195593                                                                       |
| ZPE_corr                  | a.u.     | 0.149758                                                                          | 0.149162                                                                           | 0.150908                                                                            |
| U_corr                    | a.u.     | 0.161632                                                                          | 0.160906                                                                           | 0.162744                                                                            |
| H_corr                    | a.u.     | 0.162576                                                                          | 0.161850                                                                           | 0.163688                                                                            |
| G_corr                    | a.u.     | 0.109794                                                                          | 0.109870                                                                           | 0.110822                                                                            |
| U(T)                      | a.u.     | -726.2529539991                                                                   | -726.2502572051                                                                    | -726.2492119337                                                                     |
| H(T)                      | a.u.     | -726.2520099991                                                                   | -726.2493132051                                                                    | -726.2482679337                                                                     |
| G(T)                      | a.u.     | -726.3047919991                                                                   | -726.3012932051                                                                    | -726.3011339337                                                                     |
| Electron energy barrier   | kJ/mol   | 35.6577372813                                                                     |                                                                                    |                                                                                     |
| Delta electron energy     | kJ/mol   | -28.5556495106                                                                    |                                                                                    |                                                                                     |
| Gibbs Free Energy Barrier | kJ/mol   | -3.0992951308                                                                     |                                                                                    |                                                                                     |
| Delta G                   | kJ/mol   | -12.4796699523                                                                    |                                                                                    |                                                                                     |
| Electron energy barrier   | kcal/mol | 8.5224037479                                                                      |                                                                                    |                                                                                     |
| Delta electron energy     | kcal/mol | -6.8249640322                                                                     |                                                                                    |                                                                                     |
| Gibbs Free Energy Barrier | kcal/mol | -0.7407493142                                                                     |                                                                                    |                                                                                     |
| Delta G                   | kcal/mol | -2.9827127037                                                                     |                                                                                    |                                                                                     |

**Table S35:** Thermodynamics data of **15**.

| Structure                 |          | 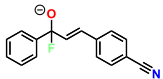 |  |  |
|---------------------------|----------|-----------------------------------------------------------------------------------|------------------------------------------------------------------------------------|-------------------------------------------------------------------------------------|
| ZPE (M05-2X/Gas)          | a.u.     | -846.07230904                                                                     | -846.05501664                                                                      | -846.06606878                                                                       |
| ZPE (M05-2X/SMD)          | a.u.     | -846.16578513                                                                     | -846.14430410                                                                      | -846.15245675                                                                       |
| Solvation delta G         | kJ/mol   | -245.42146117                                                                     | -234.42423148                                                                      | -226.81161786                                                                       |
| ZPE (M06-2X/IEFPCM)       | a.u.     | -845.27865084                                                                     | -845.25804910                                                                      | -845.26851306                                                                       |
| ZPE (double hybrid)       | a.u.     | -844.93895343                                                                     | -844.93356851                                                                      | -844.93100564                                                                       |
| ZPE_corr                  | a.u.     | 0.226959                                                                          | 0.226277                                                                           | 0.227296                                                                            |
| U_corr                    | a.u.     | 0.242758                                                                          | 0.242050                                                                           | 0.243171                                                                            |
| H_corr                    | a.u.     | 0.243702                                                                          | 0.242994                                                                           | 0.244116                                                                            |
| G_corr                    | a.u.     | 0.181130                                                                          | 0.180857                                                                           | 0.181433                                                                            |
| U(T)                      | a.u.     | -844.6961954348                                                                   | -844.6915185131                                                                    | -844.6878346384                                                                     |
| H(T)                      | a.u.     | -844.6952514348                                                                   | -844.6905745131                                                                    | -844.6868896384                                                                     |
| G(T)                      | a.u.     | -844.7578234348                                                                   | -844.7527115131                                                                    | -844.7495726384                                                                     |
| Electron energy barrier   | kJ/mol   | 54.0898867485                                                                     |                                                                                    |                                                                                     |
| Delta electron energy     | kJ/mol   | 26.6167361392                                                                     |                                                                                    |                                                                                     |
| Gibbs Free Energy Barrier | kJ/mol   | 24.4185801885                                                                     |                                                                                    |                                                                                     |
| Delta G                   | kJ/mol   | 40.2723094389                                                                     |                                                                                    |                                                                                     |
| Electron energy barrier   | kcal/mol | 12.9277931999                                                                     |                                                                                    |                                                                                     |
| Delta electron energy     | kcal/mol | 6.3615526145                                                                      |                                                                                    |                                                                                     |
| Gibbs Free Energy Barrier | kcal/mol | 5.8361807334                                                                      |                                                                                    |                                                                                     |
| Delta G                   | kcal/mol | 9.6253129634                                                                      |                                                                                    |                                                                                     |

**Table S36:** Thermodynamics data of **16**.

| Structure                 |          | 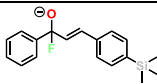 |  |  |
|---------------------------|----------|-----------------------------------------------------------------------------------|------------------------------------------------------------------------------------|-------------------------------------------------------------------------------------|
| ZPE (M05-2X/Gas)          | a.u.     | -1162.45161459                                                                    | -1162.43099443                                                                     | -1162.43481451                                                                      |
| ZPE (M05-2X/SMD)          | a.u.     | -1162.55043209                                                                    | -1162.52335234                                                                     | -1162.52410619                                                                      |
| Solvation delta G         | kJ/mol   | -259.44534625                                                                     | -242.48569270                                                                      | -234.43530584                                                                       |
| ZPE (M06-2X/IEFPCM)       | a.u.     | -1161.54222877                                                                    | -1161.51579365                                                                     | -1161.51790245                                                                      |
| ZPE (double hybrid)       | a.u.     | -1161.02066564                                                                    | -1161.00832357                                                                     | -1161.00428222                                                                      |
| ZPE_corr                  | a.u.     | 0.328730                                                                          | 0.327951                                                                           | 0.328279                                                                            |
| U_corr                    | a.u.     | 0.350753                                                                          | 0.349821                                                                           | 0.350510                                                                            |
| H_corr                    | a.u.     | 0.351697                                                                          | 0.350765                                                                           | 0.351454                                                                            |
| G_corr                    | a.u.     | 0.274905                                                                          | 0.275342                                                                           | 0.274546                                                                            |
| U(T)                      | a.u.     | -1160.6699126421                                                                  | -1160.6585025735                                                                   | -1160.6537722235                                                                    |
| H(T)                      | a.u.     | -1160.6689686421                                                                  | -1160.6575585735                                                                   | -1160.6528282235                                                                    |
| G(T)                      | a.u.     | -1160.7457606421                                                                  | -1160.7329815735                                                                   | -1160.7297362235                                                                    |
| Electron energy barrier   | kJ/mol   | 69.4054075602                                                                     |                                                                                    |                                                                                     |
| Delta electron energy     | kJ/mol   | 63.8687531600                                                                     |                                                                                    |                                                                                     |
| Gibbs Free Energy Barrier | kJ/mol   | 50.5110981543                                                                     |                                                                                    |                                                                                     |
| Delta G                   | kJ/mol   | 67.0821514445                                                                     |                                                                                    |                                                                                     |
| Electron energy barrier   | kcal/mol | 16.5882905259                                                                     |                                                                                    |                                                                                     |
| Delta electron energy     | kcal/mol | 15.2649983652                                                                     |                                                                                    |                                                                                     |
| Gibbs Free Energy Barrier | kcal/mol | 12.0724421975                                                                     |                                                                                    |                                                                                     |
| Delta G                   | kcal/mol | 16.0330189877                                                                     |                                                                                    |                                                                                     |



**Table S37:** Thermodynamics data of **17**.

| Structure                 |          | 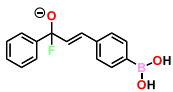 |  |  |
|---------------------------|----------|-----------------------------------------------------------------------------------|------------------------------------------------------------------------------------|-------------------------------------------------------------------------------------|
| ZPE (M05-2X/Gas)          | a.u.     | -929.81819706                                                                     | -929.79684501                                                                      | -929.80140082                                                                       |
| ZPE (M05-2X/SMD)          | a.u.     | -929.92867656                                                                     | -929.90267614                                                                      | -929.90460736                                                                       |
| Solvation delta G         | kJ/mol   | -290.06390887                                                                     | -277.85963707                                                                      | -270.96878127                                                                       |
| ZPE (M06-2X/IEFPCM)       | a.u.     | -928.97025152                                                                     | -928.94472541                                                                      | -928.94823554                                                                       |
| ZPE (double hybrid)       | a.u.     | -928.62529526                                                                     | -928.61356112                                                                      | -928.60940067                                                                       |
| ZPE_corr                  | a.u.     | 0.252733                                                                          | 0.251804                                                                           | 0.252428                                                                            |
| U_corr                    | a.u.     | 0.270297                                                                          | 0.269357                                                                           | 0.270245                                                                            |
| H_corr                    | a.u.     | 0.271242                                                                          | 0.270301                                                                           | 0.271189                                                                            |
| G_corr                    | a.u.     | 0.204728                                                                          | 0.204174                                                                           | 0.203790                                                                            |
| U(T)                      | a.u.     | -928.3549982629                                                                   | -928.3442041161                                                                    | -928.3391556709                                                                     |
| H(T)                      | a.u.     | -928.3540532629                                                                   | -928.3432601161                                                                    | -928.3382116709                                                                     |
| G(T)                      | a.u.     | -928.4205672629                                                                   | -928.4093871161                                                                    | -928.4056106709                                                                     |
| Electron energy barrier   | kJ/mol   | 67.0187939285                                                                     |                                                                                    |                                                                                     |
| Delta electron energy     | kJ/mol   | 57.8029581157                                                                     |                                                                                    |                                                                                     |
| Gibbs Free Energy Barrier | kJ/mol   | 41.5577470714                                                                     |                                                                                    |                                                                                     |
| Delta G                   | kJ/mol   | 58.3636596860                                                                     |                                                                                    |                                                                                     |
| Electron energy barrier   | kcal/mol | 16.0178761780                                                                     |                                                                                    |                                                                                     |
| Delta electron energy     | kcal/mol | 13.8152385554                                                                     |                                                                                    |                                                                                     |
| Gibbs Free Energy Barrier | kcal/mol | 9.9325399310                                                                      |                                                                                    |                                                                                     |
| Delta G                   | kcal/mol | 13.9492494469                                                                     |                                                                                    |                                                                                     |

**Table S38:** Thermodynamics data of **18**.

| Structure                 |          | 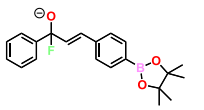 |  |  |
|---------------------------|----------|-----------------------------------------------------------------------------------|------------------------------------------------------------------------------------|-------------------------------------------------------------------------------------|
| ZPE (M05-2X/Gas)          | a.u.     | -1164.47365803                                                                    | -1164.45344667                                                                     | -1164.45985700                                                                      |
| ZPE (M05-2X/SMD)          | a.u.     | -1164.57857158                                                                    | -1164.55327344                                                                     | -1164.55600868                                                                      |
| Solvation delta G         | kJ/mol   | -275.45052552                                                                     | -262.09518464                                                                      | -252.44623584                                                                       |
| ZPE (M06-2X/IEFPCM)       | a.u.     | -1163.35015983                                                                    | -1163.32566887                                                                     | -1163.33054839                                                                      |
| ZPE (double hybrid)       | a.u.     | -1162.91361254                                                                    | -1162.90319436                                                                     | -1162.89943623                                                                      |
| ZPE_corr                  | a.u.     | 0.400408                                                                          | 0.399714                                                                           | 0.400258                                                                            |
| U_corr                    | a.u.     | 0.424463                                                                          | 0.423651                                                                           | 0.424424                                                                            |
| H_corr                    | a.u.     | 0.425407                                                                          | 0.424595                                                                           | 0.425369                                                                            |
| G_corr                    | a.u.     | 0.344234                                                                          | 0.344505                                                                           | 0.343922                                                                            |
| U(T)                      | a.u.     | -1162.4891495374                                                                  | -1162.4795433553                                                                   | -1162.4750122276                                                                    |
| H(T)                      | a.u.     | -1162.4882055374                                                                  | -1162.4785993553                                                                   | -1162.4740672276                                                                    |
| G(T)                      | a.u.     | -1162.5693785374                                                                  | -1162.5586893553                                                                   | -1162.5555142276                                                                    |
| Electron energy barrier   | kJ/mol   | 64.3010154796                                                                     |                                                                                    |                                                                                     |
| Delta electron energy     | kJ/mol   | 51.4898357196                                                                     |                                                                                    |                                                                                     |
| Gibbs Free Energy Barrier | kJ/mol   | 41.4197884934                                                                     |                                                                                    |                                                                                     |
| Delta G                   | kJ/mol   | 59.4050350649                                                                     |                                                                                    |                                                                                     |
| Electron energy barrier   | kcal/mol | 15.3683115391                                                                     |                                                                                    |                                                                                     |
| Delta electron energy     | kcal/mol | 12.3063660898                                                                     |                                                                                    |                                                                                     |
| Gibbs Free Energy Barrier | kcal/mol | 9.8995670395                                                                      |                                                                                    |                                                                                     |
| Delta G                   | kcal/mol | 14.1981441360                                                                     |                                                                                    |                                                                                     |

**Table S39:** Thermodynamics data of **19**.

| Structure                 |          |                  |                  |                  |
|---------------------------|----------|------------------|------------------|------------------|
| ZPE (M05-2X/Gas)          | a.u.     | -1557.81953800   | -1557.80090489   | -1557.80781555   |
| ZPE (M05-2X/SMD)          | a.u.     | -1557.92900877   | -1557.90366315   | -1557.90612128   |
| Solvation delta G         | kJ/mol   | -287.41550664    | -269.79181163    | -258.10169411    |
| ZPE (M06-2X/IEFPCM)       | a.u.     | -1556.54072160   | -1556.51612949   | -1556.52035702   |
| ZPE (double hybrid)       | a.u.     | -1555.84483822   | -1555.83569553   | -1555.83281780   |
| ZPE_corr                  | a.u.     | 0.402682         | 0.402069         | 0.402520         |
| U_corr                    | a.u.     | 0.428253         | 0.427459         | 0.428255         |
| H_corr                    | a.u.     | 0.429197         | 0.428403         | 0.429199         |
| G_corr                    | a.u.     | 0.341843         | 0.342266         | 0.341233         |
| U(T)                      | a.u.     | -1555.4165852171 | -1555.4082365322 | -1555.4045627951 |
| H(T)                      | a.u.     | -1555.4156412171 | -1555.4072925322 | -1555.4036187951 |
| G(T)                      | a.u.     | -1555.5029952171 | -1555.4934295322 | -1555.4915847951 |
| Electron energy barrier   | kJ/mol   | 64.5665848055    |                  |                  |
| Delta electron energy     | kJ/mol   | 53.4672047905    |                  |                  |
| Gibbs Free Energy Barrier | kJ/mol   | 42.7384007111    |                  |                  |
| Delta G                   | kJ/mol   | 59.2718754818    |                  |                  |
| Electron energy barrier   | kcal/mol | 15.4317841313    |                  |                  |
| Delta electron energy     | kcal/mol | 12.7789686402    |                  |                  |
| Gibbs Free Energy Barrier | kcal/mol | 10.2147229233    |                  |                  |
| Delta G                   | kcal/mol | 14.1663182318    |                  |                  |

**Table S40:** Thermodynamics data of **20**.

| Structure                 |          | 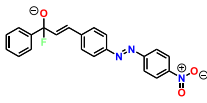 |  |  |
|---------------------------|----------|-----------------------------------------------------------------------------------|------------------------------------------------------------------------------------|-------------------------------------------------------------------------------------|
| ZPE (M05-2X/Gas)          | a.u.     | -1298.78802112                                                                    | -1298.77426131                                                                     | -1298.80400300                                                                      |
| ZPE (M05-2X/SMD)          | a.u.     | -1298.88477562                                                                    | -1298.86410544                                                                     | -1298.88544668                                                                      |
| Solvation delta G         | kJ/mol   | -254.02893975                                                                     | -235.88576332                                                                      | -213.83038184                                                                       |
| ZPE (M06-2X/IEFPCM)       | a.u.     | -1297.53108004                                                                    | -1297.51124202                                                                     | -1297.53443425                                                                      |
| ZPE (double hybrid)       | a.u.     | -1297.09227697                                                                    | -1297.09193053                                                                     | -1297.10712965                                                                      |
| ZPE_corr                  | a.u.     | 0.322474                                                                          | 0.321925                                                                           | 0.323491                                                                            |
| U_corr                    | a.u.     | 0.345668                                                                          | 0.344979                                                                           | 0.346415                                                                            |
| H_corr                    | a.u.     | 0.346613                                                                          | 0.345923                                                                           | 0.347359                                                                            |
| G_corr                    | a.u.     | 0.264019                                                                          | 0.264752                                                                           | 0.267044                                                                            |
| U(T)                      | a.u.     | -1296.7466089662                                                                  | -1296.7469515311                                                                   | -1296.7607146533                                                                    |
| H(T)                      | a.u.     | -1296.7456639662                                                                  | -1296.7460075311                                                                   | -1296.7597706533                                                                    |
| G(T)                      | a.u.     | -1296.8282579662                                                                  | -1296.8271785311                                                                   | -1296.8400856533                                                                    |
| Electron energy barrier   | kJ/mol   | 52.0847215099                                                                     |                                                                                    |                                                                                     |
| Delta electron energy     | kJ/mol   | -8.8064783550                                                                     |                                                                                    |                                                                                     |
| Gibbs Free Energy Barrier | kJ/mol   | 20.9772332904                                                                     |                                                                                    |                                                                                     |
| Delta G                   | kJ/mol   | 9.1449654286                                                                      |                                                                                    |                                                                                     |
| Electron energy barrier   | kcal/mol | 12.4485472060                                                                     |                                                                                    |                                                                                     |
| Delta electron energy     | kcal/mol | -2.1047988420                                                                     |                                                                                    |                                                                                     |
| Gibbs Free Energy Barrier | kcal/mol | 5.0136790847                                                                      |                                                                                    |                                                                                     |
| Delta G                   | kcal/mol | 2.1856991942                                                                      |                                                                                    |                                                                                     |

**Table S41:** Thermodynamics data of the reaction of **21** and **22**.

| Structure                 |          |  | CO <sub>2</sub> |  |  |
|---------------------------|----------|-----------------------------------------------------------------------------------|-----------------|------------------------------------------------------------------------------------|-------------------------------------------------------------------------------------|
| ZPE (M05-2X/Gas)          | a.u.     | -522.77478819                                                                     | -188.55290226   | -711.30502637                                                                      | -711.36104732                                                                       |
| ZPE (M05-2X/SMD)          | a.u.     | -522.87027155                                                                     | -188.55322108   | -711.39147931                                                                      | -711.46012928                                                                       |
| Solvation delta G         | kJ/mol   | -250.69157481                                                                     | -0.83707766     | -226.98219397                                                                      | -260.13966235                                                                       |
| ZPE (M06-2X/IEFPCM)       | a.u.     | -522.32728049                                                                     | -188.37322033   | -710.66692025                                                                      | -710.73464067                                                                       |
| ZPE (double hybrid)       | a.u.     | -522.11771680                                                                     | -188.36815455   | -710.46486579                                                                      | -710.50588455                                                                       |
| ZPE_corr                  | a.u.     | 0.145773                                                                          | 0.012012        | 0.157416                                                                           | 0.163534                                                                            |
| U_corr                    | a.u.     | 0.155191                                                                          | 0.014629        | 0.170725                                                                           | 0.175524                                                                            |
| H_corr                    | a.u.     | 0.156135                                                                          | 0.015574        | 0.171669                                                                           | 0.176468                                                                            |
| G_corr                    | a.u.     | 0.110742                                                                          | -0.008673       | 0.114985                                                                           | 0.123406                                                                            |
| U(T)                      | a.u.     | -521.9625257958                                                                   | -188.3535255507 | -710.2941407903                                                                    | -710.3303605501                                                                     |
| H(T)                      | a.u.     | -521.9615817958                                                                   | -188.3525805507 | -710.2931967903                                                                    | -710.3294165501                                                                     |
| G(T)                      | a.u.     | -522.0069747958                                                                   | -188.3768275507 | -710.3498807903                                                                    | -710.3824785501                                                                     |
| Electron energy barrier   | kJ/mol   | 88.1657707822                                                                     |                 |                                                                                    |                                                                                     |
| Delta electron energy     | kJ/mol   | -89.6341761749                                                                    |                 |                                                                                    |                                                                                     |
| Gibbs Free Energy Barrier | kJ/mol   | 113.6075043829                                                                    |                 |                                                                                    |                                                                                     |
| Delta G                   | kJ/mol   | -5.1353823791                                                                     |                 |                                                                                    |                                                                                     |
| Electron energy barrier   | kcal/mol | 21.0721249480                                                                     |                 |                                                                                    |                                                                                     |
| Delta electron energy     | kcal/mol | -21.4230822598                                                                    |                 |                                                                                    |                                                                                     |
| Gibbs Free Energy Barrier | kcal/mol | 27.1528452158                                                                     |                 |                                                                                    |                                                                                     |
| Delta G                   | kcal/mol | -1.2273858459                                                                     |                 |                                                                                    |                                                                                     |

**Table S42:** Thermodynamics data of the reaction of **21** and **23**.

| Structure                 |          |  | HCHO            |  |  |
|---------------------------|----------|-----------------------------------------------------------------------------------|-----------------|------------------------------------------------------------------------------------|-------------------------------------------------------------------------------------|
| ZPE (M05-2X/Gas)          | a.u.     | -522.77478819                                                                     | -114.47527365   | -637.23214750                                                                      | -637.25447175                                                                       |
| ZPE (M05-2X/SMD)          | a.u.     | -522.87027155                                                                     | -114.47944252   | -637.31948565                                                                      | -637.35880398                                                                       |
| Solvation delta G         | kJ/mol   | -250.69157481                                                                     | -10.94537344    | -229.30632333                                                                      | -273.92428824                                                                       |
| ZPE (M06-2X/IEFPCM)       | a.u.     | -522.32728049                                                                     | -114.36510008   | -636.70078348                                                                      | -636.70191680                                                                       |
| ZPE (double hybrid)       | a.u.     | -522.11771680                                                                     | -114.35682972   | -636.45939476                                                                      | -636.47540989                                                                       |
| ZPE_corr                  | a.u.     | 0.145773                                                                          | 0.027211        | 0.174630                                                                           | 0.179245                                                                            |
| U_corr                    | a.u.     | 0.155191                                                                          | 0.030077        | 0.187371                                                                           | 0.190928                                                                            |
| H_corr                    | a.u.     | 0.156135                                                                          | 0.031021        | 0.188315                                                                           | 0.191872                                                                            |
| G_corr                    | a.u.     | 0.110742                                                                          | 0.005552        | 0.134290                                                                           | 0.139924                                                                            |
| U(T)                      | a.u.     | -521.9625257958                                                                   | -114.3267527239 | -636.2720237587                                                                    | -636.2844818890                                                                     |
| H(T)                      | a.u.     | -521.9615817958                                                                   | -114.3258087239 | -636.2710797587                                                                    | -636.2835378890                                                                     |
| G(T)                      | a.u.     | -522.0069747958                                                                   | -114.3512777239 | -636.3251047587                                                                    | -636.3354858890                                                                     |
| Electron energy barrier   | kJ/mol   | -22.0618507068                                                                    |                 |                                                                                    |                                                                                     |
| Delta electron energy     | kJ/mol   | -25.0373718647                                                                    |                 |                                                                                    |                                                                                     |
| Gibbs Free Energy Barrier | kJ/mol   | 119.3600714484                                                                    |                 |                                                                                    |                                                                                     |
| Delta G                   | kJ/mol   | 47.4864488766                                                                     |                 |                                                                                    |                                                                                     |
| Electron energy barrier   | kcal/mol | -5.2729088687                                                                     |                 |                                                                                    |                                                                                     |
| Delta electron energy     | kcal/mol | -5.9840754935                                                                     |                 |                                                                                    |                                                                                     |
| Gibbs Free Energy Barrier | kcal/mol | 28.5277417420                                                                     |                 |                                                                                    |                                                                                     |
| Delta G                   | kcal/mol | 11.3495336703                                                                     |                 |                                                                                    |                                                                                     |

**Table S43:** Thermodynamics data of the reaction of **21** and **24**.

| Structure                 |          |  | HCHO            |  |  |
|---------------------------|----------|-----------------------------------------------------------------------------------|-----------------|------------------------------------------------------------------------------------|-------------------------------------------------------------------------------------|
| ZPE (M05-2X/Gas)          | a.u.     | -522.77478819                                                                     | -114.47526324   | -637.22887941                                                                      | -637.30015905                                                                       |
| ZPE (M05-2X/SMD)          | a.u.     | -522.87027155                                                                     | -114.47942688   | -637.31934410                                                                      | -637.39327715                                                                       |
| Solvation delta G         | kJ/mol   | -250.69157481                                                                     | -10.93164470    | -237.51503834                                                                      | -244.48157943                                                                       |
| ZPE (M06-2X/IEFPCM)       | a.u.     | -522.32728049                                                                     | -114.36510050   | -636.69901866                                                                      | -636.73442086                                                                       |
| ZPE (double hybrid)       | a.u.     | -522.11771680                                                                     | -114.35681901   | -636.45716380                                                                      | -636.51096522                                                                       |
| ZPE_corr                  | a.u.     | 0.145773                                                                          | 0.027200        | 0.174599                                                                           | 0.182237                                                                            |
| U_corr                    | a.u.     | 0.155191                                                                          | 0.030065        | 0.187449                                                                           | 0.192917                                                                            |
| H_corr                    | a.u.     | 0.156135                                                                          | 0.031009        | 0.188393                                                                           | 0.193862                                                                            |
| G_corr                    | a.u.     | 0.110742                                                                          | 0.005541        | 0.133365                                                                           | 0.144816                                                                            |
| U(T)                      | a.u.     | -521.9625257958                                                                   | -114.3267540060 | -636.2697148042                                                                    | -636.3180482221                                                                     |
| H(T)                      | a.u.     | -521.9615817958                                                                   | -114.3258100060 | -636.2687708042                                                                    | -636.3171032221                                                                     |
| G(T)                      | a.u.     | -522.0069747958                                                                   | -114.3512780060 | -636.3237988042                                                                    | -636.3661492221                                                                     |
| Electron energy barrier   | kJ/mol   | -17.4272130870                                                                    |                 |                                                                                    |                                                                                     |
| Delta electron energy     | kJ/mol   | -110.3756813106                                                                   |                 |                                                                                    |                                                                                     |
| Gibbs Free Energy Barrier | kJ/mol   | 114.5671518854                                                                    |                 |                                                                                    |                                                                                     |
| Delta G                   | kJ/mol   | -3.5904115248                                                                     |                 |                                                                                    |                                                                                     |
| Electron energy barrier   | kcal/mol | -4.1652038927                                                                     |                 |                                                                                    |                                                                                     |
| Delta electron energy     | kcal/mol | -26.3804209633                                                                    |                 |                                                                                    |                                                                                     |
| Gibbs Free Energy Barrier | kcal/mol | 27.3822064736                                                                     |                 |                                                                                    |                                                                                     |
| Delta G                   | kcal/mol | -0.8581289495                                                                     |                 |                                                                                    |                                                                                     |

**Table S44:** Thermodynamics data of the reaction of **21** and **25**.

| Structure                 |          |  | CH <sub>3</sub> CHO |  |  |
|---------------------------|----------|-----------------------------------------------------------------------------------|---------------------|------------------------------------------------------------------------------------|-------------------------------------------------------------------------------------|
| ZPE (M05-2X/Gas)          | a.u.     | -522.77478819                                                                     | -153.79662761       | -676.54589144                                                                      | -676.62025408                                                                       |
| ZPE (M05-2X/SMD)          | a.u.     | -522.87027155                                                                     | -153.80381438       | -676.63675195                                                                      | -676.71117263                                                                       |
| Solvation delta G         | kJ/mol   | -250.69157481                                                                     | -18.86887514        | -238.55427951                                                                      | -238.70666615                                                                       |
| ZPE (M06-2X/IEFPCM)       | a.u.     | -522.32728049                                                                     | -153.64262547       | -675.97337370                                                                      | -676.00800088                                                                       |
| ZPE (double hybrid)       | a.u.     | -522.11771680                                                                     | -153.61928002       | -675.71347098                                                                      | -675.77060093                                                                       |
| ZPE_corr                  | a.u.     | 0.145773                                                                          | 0.055901            | 0.202886                                                                           | 0.210056                                                                            |
| U_corr                    | a.u.     | 0.155191                                                                          | 0.059789            | 0.216813                                                                           | 0.221979                                                                            |
| H_corr                    | a.u.     | 0.156135                                                                          | 0.060733            | 0.217758                                                                           | 0.222923                                                                            |
| G_corr                    | a.u.     | 0.110742                                                                          | 0.030972            | 0.161592                                                                           | 0.171338                                                                            |
| U(T)                      | a.u.     | -521.9625257958                                                                   | -153.5594910155     | -675.4966579797                                                                    | -675.5486219350                                                                     |
| H(T)                      | a.u.     | -521.9615817958                                                                   | -153.5585470155     | -675.4957129797                                                                    | -675.5476779350                                                                     |
| G(T)                      | a.u.     | -522.0069747958                                                                   | -153.5883080155     | -675.5518789797                                                                    | -675.5992629350                                                                     |
| Electron energy barrier   | kJ/mol   | -9.1045644974                                                                     |                     |                                                                                    |                                                                                     |
| Delta electron energy     | kJ/mol   | -100.0182098344                                                                   |                     |                                                                                    |                                                                                     |
| Gibbs Free Energy Barrier | kJ/mol   | 144.9629301987                                                                    |                     |                                                                                    |                                                                                     |
| Delta G                   | kJ/mol   | 20.4039691232                                                                     |                     |                                                                                    |                                                                                     |
| Electron energy barrier   | kcal/mol | -2.1760431399                                                                     |                     |                                                                                    |                                                                                     |
| Delta electron energy     | kcal/mol | -23.9049258686                                                                    |                     |                                                                                    |                                                                                     |
| Gibbs Free Energy Barrier | kcal/mol | 34.6469718448                                                                     |                     |                                                                                    |                                                                                     |
| Delta G                   | kcal/mol | 4.8766656604                                                                      |                     |                                                                                    |                                                                                     |



**Table S45:** Thermodynamics data of the reaction of **21** and **26**.

| Structure                 |          |  | CH <sub>3</sub> COCH <sub>3</sub> |  |  |
|---------------------------|----------|-----------------------------------------------------------------------------------|-----------------------------------|------------------------------------------------------------------------------------|-------------------------------------------------------------------------------------|
| ZPE (M05-2X/Gas)          | a.u.     | -522.77478819                                                                     | -193.11546085                     | -715.86415875                                                                      | -715.93463565                                                                       |
| ZPE (M05-2X/SMD)          | a.u.     | -522.87027155                                                                     | -193.12426270                     | -715.95304498                                                                      | -716.02464296                                                                       |
| Solvation delta G         | kJ/mol   | -250.69157481                                                                     | -23.10925717                      | -233.37079424                                                                      | -236.31419241                                                                       |
| ZPE (M06-2X/IEFPCM)       | a.u.     | -522.32728049                                                                     | -192.91762108                     | -715.25274604                                                                      | -715.27755718                                                                       |
| ZPE (double hybrid)       | a.u.     | -522.11771680                                                                     | -192.87904601                     | -714.97064375                                                                      | -715.02678689                                                                       |
| ZPE_corr                  | a.u.     | 0.145773                                                                          | 0.083901                          | 0.230686                                                                           | 0.237754                                                                            |
| U_corr                    | a.u.     | 0.155191                                                                          | 0.089234                          | 0.245979                                                                           | 0.250876                                                                            |
| H_corr                    | a.u.     | 0.156135                                                                          | 0.090178                          | 0.246924                                                                           | 0.251820                                                                            |
| G_corr                    | a.u.     | 0.110742                                                                          | 0.055908                          | 0.187404                                                                           | 0.198610                                                                            |
| U(T)                      | a.u.     | -521.9625257958                                                                   | -192.7898120056                   | -714.7246647503                                                                    | -714.7759108863                                                                     |
| H(T)                      | a.u.     | -521.9615817958                                                                   | -192.7888680056                   | -714.7237197503                                                                    | -714.7749668863                                                                     |
| G(T)                      | a.u.     | -522.0069747958                                                                   | -192.8231380056                   | -714.7832397503                                                                    | -714.8281768863                                                                     |
| Electron energy barrier   | kJ/mol   | -20.5956533596                                                                    |                                   |                                                                                    |                                                                                     |
| Delta electron energy     | kJ/mol   | -85.7372883019                                                                    |                                   |                                                                                    |                                                                                     |
| Gibbs Free Energy Barrier | kJ/mol   | 163.4952334587                                                                    |                                   |                                                                                    |                                                                                     |
| Delta G                   | kJ/mol   | 42.5693846990                                                                     |                                   |                                                                                    |                                                                                     |
| Electron energy barrier   | kcal/mol | -4.9224792924                                                                     |                                   |                                                                                    |                                                                                     |
| Delta electron energy     | kcal/mol | -20.4917037050                                                                    |                                   |                                                                                    |                                                                                     |
| Gibbs Free Energy Barrier | kcal/mol | 39.0762986278                                                                     |                                   |                                                                                    |                                                                                     |
| Delta G                   | kcal/mol | 10.1743271269                                                                     |                                   |                                                                                    |                                                                                     |

**Table S46:** Thermodynamics data of the reaction of **21** and **27**.

| Structure                 |          |  | C <sub>6</sub> H <sub>5</sub> CHO |  |  |
|---------------------------|----------|-----------------------------------------------------------------------------------|-----------------------------------|------------------------------------------------------------------------------------|-------------------------------------------------------------------------------------|
| ZPE (M05-2X/Gas)          | a.u.     | -522.77478819                                                                     | -345.52810710                     | -868.27998367                                                                      | -868.35504290                                                                       |
| ZPE (M05-2X/SMD)          | a.u.     | -522.87027155                                                                     | -345.54089581                     | -868.37558405                                                                      | -868.44802155                                                                       |
| Solvation delta G         | kJ/mol   | -250.69157481                                                                     | -33.57675811                      | -250.99880032                                                                      | -244.11545608                                                                       |
| ZPE (M06-2X/IEFPCM)       | a.u.     | -522.32728049                                                                     | -345.17365197                     | -867.50618829                                                                      | -867.53977854                                                                       |
| ZPE (double hybrid)       | a.u.     | -522.11771680                                                                     | -345.05268763                     | -867.15228545                                                                      | -867.20790248                                                                       |
| ZPE_corr                  | a.u.     | 0.145773                                                                          | 0.111093                          | 0.257102                                                                           | 0.263947                                                                            |
| U_corr                    | a.u.     | 0.155191                                                                          | 0.117354                          | 0.274068                                                                           | 0.278953                                                                            |
| H_corr                    | a.u.     | 0.156135                                                                          | 0.118298                          | 0.275012                                                                           | 0.279898                                                                            |
| G_corr                    | a.u.     | 0.110742                                                                          | 0.080578                          | 0.210475                                                                           | 0.220462                                                                            |
| U(T)                      | a.u.     | -521.9625257958                                                                   | -344.9353336255                   | -866.8782174544                                                                    | -866.9289494788                                                                     |
| H(T)                      | a.u.     | -521.9615817958                                                                   | -344.9343896255                   | -866.8772734544                                                                    | -866.9280044788                                                                     |
| G(T)                      | a.u.     | -522.0069747958                                                                   | -344.9721096255                   | -866.9418104544                                                                    | -866.9874404788                                                                     |
| Electron energy barrier   | kJ/mol   | -13.7992052946                                                                    |                                   |                                                                                    |                                                                                     |
| Delta electron energy     | kJ/mol   | -101.9903935421                                                                   |                                   |                                                                                    |                                                                                     |
| Gibbs Free Energy Barrier | kJ/mol   | 131.1323325880                                                                    |                                   |                                                                                    |                                                                                     |
| Delta G                   | kJ/mol   | 18.2140477909                                                                     |                                   |                                                                                    |                                                                                     |
| Electron energy barrier   | kcal/mol | -3.2980892195                                                                     |                                   |                                                                                    |                                                                                     |
| Delta electron energy     | kcal/mol | -24.3762890875                                                                    |                                   |                                                                                    |                                                                                     |
| Gibbs Free Energy Barrier | kcal/mol | 31.3413796816                                                                     |                                   |                                                                                    |                                                                                     |
| Delta G                   | kcal/mol | 4.3532619003                                                                      |                                   |                                                                                    |                                                                                     |

**Table S47:** Thermodynamics data of the reaction of **21** and **28**.

| Structure                 |          |  | $C_6H_5COC_6H_5$ |  |  |
|---------------------------|----------|-----------------------------------------------------------------------------------|------------------|------------------------------------------------------------------------------------|-------------------------------------------------------------------------------------|
| ZPE (M05-2X/Gas)          | a.u.     | -522.77478819                                                                     | -576.57055597    | -1099.32338466                                                                     | -1099.39431656                                                                      |
| ZPE (M05-2X/SMD)          | a.u.     | -522.87027155                                                                     | -576.58971426    | -1099.42001454                                                                     | -1099.48998652                                                                      |
| Solvation delta G         | kJ/mol   | -250.69157481                                                                     | -50.30007202     | -253.70174994                                                                      | -251.18147998                                                                       |
| ZPE (M06-2X/IEFPCM)       | a.u.     | -522.32728049                                                                     | -575.97250424    | -1098.26756456                                                                     | -1098.33536421                                                                      |
| ZPE (double hybrid)       | a.u.     | -522.11771680                                                                     | -575.73991917    | -1097.84007911                                                                     | -1097.89380577                                                                      |
| ZPE_corr                  | a.u.     | 0.145773                                                                          | 0.193475         | 0.339074                                                                           | 0.345498                                                                            |
| U_corr                    | a.u.     | 0.155191                                                                          | 0.204108         | 0.360448                                                                           | 0.364970                                                                            |
| H_corr                    | a.u.     | 0.156135                                                                          | 0.205052         | 0.361393                                                                           | 0.365914                                                                            |
| G_corr                    | a.u.     | 0.110742                                                                          | 0.156013         | 0.286406                                                                           | 0.296467                                                                            |
| U(T)                      | a.u.     | -521.9625257958                                                                   | -575.5358111672  | -1097.4796311086                                                                   | -1097.5288357707                                                                    |
| H(T)                      | a.u.     | -521.9615817958                                                                   | -575.5348671672  | -1097.4786861086                                                                   | -1097.5278917707                                                                    |
| G(T)                      | a.u.     | -522.0069747958                                                                   | -575.5839061672  | -1097.5536731086                                                                   | -1097.5973387707                                                                    |
| Electron energy barrier   | kJ/mol   | 84.5940642116                                                                     |                  |                                                                                    |                                                                                     |
| Delta electron energy     | kJ/mol   | -93.4139168636                                                                    |                  |                                                                                    |                                                                                     |
| Gibbs Free Energy Barrier | kJ/mol   | 144.9791186639                                                                    |                  |                                                                                    |                                                                                     |
| Delta G                   | kJ/mol   | 32.8551927803                                                                     |                  |                                                                                    |                                                                                     |
| Electron energy barrier   | kcal/mol | 20.2184665898                                                                     |                  |                                                                                    |                                                                                     |
| Delta electron energy     | kcal/mol | -22.3264619655                                                                    |                  |                                                                                    |                                                                                     |
| Gibbs Free Energy Barrier | kcal/mol | 34.6508409808                                                                     |                  |                                                                                    |                                                                                     |
| Delta G                   | kcal/mol | 7.8525795364                                                                      |                  |                                                                                    |                                                                                     |

**Table S48:** Thermodynamics data of the reaction of **21** and **29**.

| Structure                 |          |  |  |  |  |  |
|---------------------------|----------|-----------------------------------------------------------------------------------|-----------------------------------------------------------------------------------|------------------------------------------------------------------------------------|-------------------------------------------------------------------------------------|-------------------------------------------------------------------------------------|
| ZPE (M05-2X/Gas)          | a.u.     | -522.77478819                                                                     | -535.22560396                                                                     | -1058.09769515                                                                     | -675.99204777                                                                       | -382.20283048                                                                       |
| ZPE (M05-2X/SMD)          | a.u.     | -522.87027155                                                                     | -535.31499060                                                                     | -1058.15582881                                                                     | -676.01269179                                                                       | -382.21887469                                                                       |
| Solvation delta G         | kJ/mol   | -250.69157481                                                                     | -234.68462595                                                                     | -152.62992433                                                                      | -54.20087714                                                                        | -42.12408648                                                                        |
| ZPE (M06-2X/IEFPCM)       | a.u.     | -522.32728049                                                                     | -534.73724526                                                                     | -1057.04312189                                                                     | -675.30405308                                                                       | -381.80935035                                                                       |
| ZPE (double hybrid)       | a.u.     | -522.11771680                                                                     | -534.50319629                                                                     | -1056.71848374                                                                     | -675.13813399                                                                       | -381.66519353                                                                       |
| ZPE_corr                  | a.u.     | 0.145773                                                                          | 0.214555                                                                          | 0.360924                                                                           | 0.198628                                                                            | 0.163213                                                                            |
| U_corr                    | a.u.     | 0.155191                                                                          | 0.226554                                                                          | 0.383584                                                                           | 0.211550                                                                            | 0.171700                                                                            |
| H_corr                    | a.u.     | 0.156135                                                                          | 0.227498                                                                          | 0.384528                                                                           | 0.212494                                                                            | 0.172644                                                                            |
| G_corr                    | a.u.     | 0.110742                                                                          | 0.175760                                                                          | 0.307564                                                                           | 0.157637                                                                            | 0.129765                                                                            |
| U(T)                      | a.u.     | -521.9625257958                                                                   | -534.2766422895                                                                   | -1056.3348997371                                                                   | -674.9265839939                                                                     | -381.4934935264                                                                     |
| H(T)                      | a.u.     | -521.9615817958                                                                   | -534.2756982895                                                                   | -1056.3339557371                                                                   | -674.9256399939                                                                     | -381.4925495264                                                                     |
| G(T)                      | a.u.     | -522.0069747958                                                                   | -534.3274362895                                                                   | -1056.4109197371                                                                   | -674.9804969939                                                                     | -381.5354285264                                                                     |
| Electron energy barrier   | kJ/mol   | 56.1958396808                                                                     |                                                                                   |                                                                                    |                                                                                     |                                                                                     |
| Delta electron energy     | kJ/mol   | -128.3283383376                                                                   |                                                                                   |                                                                                    |                                                                                     |                                                                                     |
| Gibbs Free Energy Barrier | kJ/mol   | 131.8728112531                                                                    |                                                                                   |                                                                                    |                                                                                     |                                                                                     |
| Delta G                   | kJ/mol   | -87.5149118782                                                                    |                                                                                   |                                                                                    |                                                                                     |                                                                                     |
| Electron energy barrier   | kcal/mol | 13.4311280308                                                                     |                                                                                   |                                                                                    |                                                                                     |                                                                                     |
| Delta electron energy     | kcal/mol | -30.6712089717                                                                    |                                                                                   |                                                                                    |                                                                                     |                                                                                     |
| Gibbs Free Energy Barrier | kcal/mol | 31.5183583301                                                                     |                                                                                   |                                                                                    |                                                                                     |                                                                                     |
| Delta G                   | kcal/mol | -20.9165659365                                                                    |                                                                                   |                                                                                    |                                                                                     |                                                                                     |

**Table S49:** Thermodynamics data of the reaction of **21** and **30**.

| Structure                 |          |  | CH <sub>2</sub> CHNO <sub>2</sub> |  |  |
|---------------------------|----------|-----------------------------------------------------------------------------------|-----------------------------------|------------------------------------------------------------------------------------|-------------------------------------------------------------------------------------|
| ZPE (M05-2X/Gas)          | a.u.     | -522.77478819                                                                     | -283.03814450                     | -805.80161146                                                                      | -805.87592820                                                                       |
| ZPE (M05-2X/SMD)          | a.u.     | -522.87027155                                                                     | -283.04659078                     | -805.88944510                                                                      | -805.96888340                                                                       |
| Solvation delta G         | kJ/mol   | -250.69157481                                                                     | -22.17571339                      | -230.60721394                                                                      | -244.05388548                                                                       |
| ZPE (M06-2X/IEFPCM)       | a.u.     | -522.32728049                                                                     | -282.75729771                     | -805.06116946                                                                      | -805.14201849                                                                       |
| ZPE (double hybrid)       | a.u.     | -522.11771680                                                                     | -282.73135176                     | -804.84102977                                                                      | -804.90025427                                                                       |
| ZPE_corr                  | a.u.     | 0.145773                                                                          | 0.055971                          | 0.202055                                                                           | 0.208541                                                                            |
| U_corr                    | a.u.     | 0.155191                                                                          | 0.060631                          | 0.217398                                                                           | 0.222712                                                                            |
| H_corr                    | a.u.     | 0.156135                                                                          | 0.061575                          | 0.218343                                                                           | 0.223657                                                                            |
| G_corr                    | a.u.     | 0.110742                                                                          | 0.028172                          | 0.158525                                                                           | 0.165728                                                                            |
| U(T)                      | a.u.     | -521.9625257958                                                                   | -282.6707207625                   | -804.6236317654                                                                    | -804.6775422724                                                                     |
| H(T)                      | a.u.     | -521.9615817958                                                                   | -282.6697767625                   | -804.6226867654                                                                    | -804.6765972724                                                                     |
| G(T)                      | a.u.     | -522.0069747958                                                                   | -282.7031797625                   | -804.6825047654                                                                    | -804.7345262724                                                                     |
| Electron energy barrier   | kJ/mol   | 61.4596337424                                                                     |                                   |                                                                                    |                                                                                     |
| Delta electron energy     | kJ/mol   | -150.8094945228                                                                   |                                   |                                                                                    |                                                                                     |
| Gibbs Free Energy Barrier | kJ/mol   | 114.8546055142                                                                    |                                   |                                                                                    |                                                                                     |
| Delta G                   | kJ/mol   | -35.1745326476                                                                    |                                   |                                                                                    |                                                                                     |
| Electron energy barrier   | kcal/mol | 14.6892050054                                                                     |                                   |                                                                                    |                                                                                     |
| Delta electron energy     | kcal/mol | -36.0443342550                                                                    |                                   |                                                                                    |                                                                                     |
| Gibbs Free Energy Barrier | kcal/mol | 27.4509095397                                                                     |                                   |                                                                                    |                                                                                     |
| Delta G                   | kcal/mol | -8.4069150687                                                                     |                                   |                                                                                    |                                                                                     |

**Table S50:** Thermodynamics data of the reaction of **31**.

| Structure                 |          | 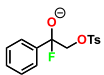 |  |  |
|---------------------------|----------|-----------------------------------------------------------------------------------|------------------------------------------------------------------------------------|-------------------------------------------------------------------------------------|
| ZPE (M05-2X/Gas)          | a.u.     | -1378.79788270                                                                    | -1378.77525980                                                                     | -1378.83756710                                                                      |
| ZPE (M05-2X/SMD)          | a.u.     | -1378.89622400                                                                    | -1378.87323440                                                                     | -1378.93155740                                                                      |
| Solvation delta G         | kJ/mol   | -250.26920163                                                                     | -249.30643078                                                                      | -238.84565113                                                                       |
| ZPE (M06-2X/IEFPCM)       | a.u.     | -1377.75464940                                                                    | -1377.72437140                                                                     | -1377.78963390                                                                      |
| ZPE (double hybrid)       | a.u.     | -1377.35938710                                                                    | -1377.34911530                                                                     | -1377.40173130                                                                      |
| ZPE_corr                  | a.u.     | 0.266249                                                                          | 0.264445                                                                           | 0.265474                                                                            |
| U_corr                    | a.u.     | 0.285003                                                                          | 0.283602                                                                           | 0.285565                                                                            |
| H_corr                    | a.u.     | 0.285948                                                                          | 0.284547                                                                           | 0.286510                                                                            |
| G_corr                    | a.u.     | 0.217990                                                                          | 0.215609                                                                           | 0.214499                                                                            |
| U(T)                      | a.u.     | -1377.07438410                                                                    | -1377.06551330                                                                     | -1377.11616630                                                                      |
| H(T)                      | a.u.     | -1377.07343910                                                                    | -1377.06456830                                                                     | -1377.11522130                                                                      |
| G(T)                      | a.u.     | -1377.14139710                                                                    | -1377.13350630                                                                     | -1377.18723230                                                                      |
| Electron energy barrier   | kJ/mol   | 79.49488900                                                                       |                                                                                    |                                                                                     |
| Delta electron energy     | kJ/mol   | -91.85180475                                                                      |                                                                                    |                                                                                     |
| Gibbs Free Energy Barrier | kJ/mol   | 21.68006625                                                                       |                                                                                    |                                                                                     |
| Delta G                   | kJ/mol   | -108.91676710                                                                     |                                                                                    |                                                                                     |
| Electron energy barrier   | kcal/mol | 18.99973446                                                                       |                                                                                    |                                                                                     |
| Delta electron energy     | kcal/mol | -21.95310821                                                                      |                                                                                    |                                                                                     |
| Gibbs Free Energy Barrier | kcal/mol | 5.18166019                                                                        |                                                                                    |                                                                                     |
| Delta G                   | kcal/mol | -26.03173210                                                                      |                                                                                    |                                                                                     |

**Table S51:** Thermodynamics data of the reaction of **32**.

| Structure                 |          | 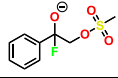 |  |  |  |
|---------------------------|----------|-----------------------------------------------------------------------------------|-----------------------------------------------------------------------------------|------------------------------------------------------------------------------------|-------------------------------------------------------------------------------------|
| ZPE (M05-2X/Gas)          | a.u.     | -1147.76714490                                                                    | -1147.74067650                                                                    | -484.06053320                                                                      | -663.71424230                                                                       |
| ZPE (M05-2X/SMD)          | a.u.     | -1147.85890140                                                                    | -1147.83234830                                                                    | -484.07503940                                                                      | -663.80698220                                                                       |
| Solvation delta G         | kJ/mol   | -232.98080923                                                                     | -232.75842938                                                                     | -30.16014658                                                                       | -235.56272593                                                                       |
| ZPE (M06-2X/IEFPCM)       | a.u.     | -1146.96315630                                                                    | -1146.92914870                                                                    | -483.56788820                                                                      | -663.40794030                                                                       |
| ZPE (double hybrid)       | a.u.     | -1146.67917830                                                                    | -1146.66643730                                                                    | -483.45032990                                                                      | -663.24197410                                                                       |
| ZPE_corr                  | a.u.     | 0.185253                                                                          | 0.183262                                                                          | 0.132542                                                                           | 0.050853                                                                            |
| U_corr                    | a.u.     | 0.199009                                                                          | 0.197658                                                                          | 0.140919                                                                           | 0.055847                                                                            |
| H_corr                    | a.u.     | 0.199953                                                                          | 0.198602                                                                          | 0.141863                                                                           | 0.056791                                                                            |
| G_corr                    | a.u.     | 0.144564                                                                          | 0.139859                                                                          | 0.098306                                                                           | 0.022629                                                                            |
| U(T)                      | a.u.     | -1146.48016930                                                                    | -1146.46877930                                                                    | -483.30941090                                                                      | -663.18612710                                                                       |
| H(T)                      | a.u.     | -1146.47922530                                                                    | -1146.46783530                                                                    | -483.30846690                                                                      | -663.18518310                                                                       |
| G(T)                      | a.u.     | -1146.53461430                                                                    | -1146.52657830                                                                    | -483.35202390                                                                      | -663.21934510                                                                       |
| Electron energy barrier   | kJ/mol   | 89.28695380                                                                       |                                                                                   |                                                                                    |                                                                                     |
| Delta electron energy     | kJ/mol   | -33.27086110                                                                      |                                                                                   |                                                                                    |                                                                                     |
| Gibbs Free Energy Barrier | kJ/mol   | 21.32089785                                                                       |                                                                                   |                                                                                    |                                                                                     |
| Delta G                   | kJ/mol   | -129.24152813                                                                     |                                                                                   |                                                                                    |                                                                                     |
| Electron energy barrier   | kcal/mol | 21.34009412                                                                       |                                                                                   |                                                                                    |                                                                                     |
| Delta electron energy     | kcal/mol | -7.95192665                                                                       |                                                                                   |                                                                                    |                                                                                     |
| Gibbs Free Energy Barrier | kcal/mol | 5.09581689                                                                        |                                                                                   |                                                                                    |                                                                                     |
| Delta G                   | kcal/mol | -30.88946657                                                                      |                                                                                   |                                                                                    |                                                                                     |

**Table S52:** Thermodynamics data of the reaction of **33**.

| Structure                 |          |                 |               |               | I <sup>-</sup> |
|---------------------------|----------|-----------------|---------------|---------------|----------------|
| ZPE (M05-2X/Gas)          | a.u.     | -781.40195350   | -781.39101820 | -484.06053320 | -297.74503850  |
| ZPE (M05-2X/SMD)          | a.u.     | -781.49091390   | -781.47943800 | -484.07503940 | -297.84671810  |
| Solvation delta G         | kJ/mol   | -225.63964868   | -224.22030338 | -30.16014658  | -259.03390828  |
| ZPE (M06-2X/IEFPCM)       | a.u.     | -781.32296510   | -781.30564550 | -483.56788820 | -297.80569510  |
| ZPE (double hybrid)       | a.u.     | -780.87181130   | -780.86666390 | -483.45032990 | -297.44266230  |
| ZPE_corr                  | a.u.     | 0.130749        | 0.129956      | 0.132542      | 0.000000       |
| U_corr                    | a.u.     | 0.140757        | 0.140241      | 0.140919      | 0.001416       |
| H_corr                    | a.u.     | 0.141701        | 0.141186      | 0.141863      | 0.002360       |
| G_corr                    | a.u.     | 0.092491        | 0.091426      | 0.098306      | -0.016848      |
| U(T)                      | a.u.     | -780.73105430   | -780.72642290 | -483.30941090 | -297.44124630  |
| H(T)                      | a.u.     | -780.73011030   | -780.72547790 | -483.30846690 | -297.44030230  |
| G(T)                      | a.u.     | -780.77932030   | -780.77523790 | -483.35202390 | -297.45951030  |
| Electron energy barrier   | kJ/mol   | 45.47260980     |               |               |                |
| Delta electron energy     | kJ/mol   | -132.89808410   |               |               |                |
| Gibbs Free Energy Barrier | kJ/mol   | 12.1376864998   |               |               |                |
| Delta G                   | kJ/mol   | -148.1320006295 |               |               |                |
| Electron energy barrier   | kcal/mol | 10.86821458     |               |               |                |
| Delta electron energy     | kcal/mol | -31.76340442    |               |               |                |
| Gibbs Free Energy Barrier | kcal/mol | 2.9009766969    |               |               |                |
| Delta G                   | kcal/mol | -35.4043978560  |               |               |                |
